# Supplementary material
Source: PubMed Central journal article supplement (PMC2852354)
Supplement: me.2009-0499_1.pdf [file me.2009-0499_1.pdf]

## Supplementary Material

| <b>File</b> | <b>Content</b>                                                                                                                                                                                                                                                                                                                        | <b>Format</b> | <b>Size</b> |
|-------------|---------------------------------------------------------------------------------------------------------------------------------------------------------------------------------------------------------------------------------------------------------------------------------------------------------------------------------------|---------------|-------------|
| SM1         | BED files for SRC-3 and Pol II ChIP-Seq experiments                                                                                                                                                                                                                                                                                   | txt           | 1.8 MB      |
| SM2         | SRC-3 /Pol II ChIP-Seq Binding Sites Analysis: counts and genomic mappings (includes ER and FoxA1 comparative analyses), peak distance distributions (comparison between SRC-3 and ER binding sites), TSS distance density plots, and comparison to known/suspected ER target genes.                                                  | xls           | 144 KB      |
| SM3         | Validation Experiments: accompanying ChIP-chip experiments, IP validation by qPCR                                                                                                                                                                                                                                                     | doc           | 312 KB      |
| SM4         | MCF-7 E2 Gene Expression Consensus Array and integrated ChIP binding site analysis: database exports for extended promoter (EPR) and gene transcribed (G10) regions, 2-set and 3-set intersections of potential target genes, and gene lists for select expression classes used for the functional classification of gene regulation. | xls           | 3.2 MB      |
| SM5         | Functional Annotation of Gene Regulation: Summary and enriched DAVID annotations for select expression classes                                                                                                                                                                                                                        | xls           | 2.1 MB      |
| SM6         | STAMP output of enriched motifs for SRC-3 ChIP-Seq binding sites                                                                                                                                                                                                                                                                      | pdf           | 3.7 MB      |
| SM7         | Potential SRC-3/RFX1 target genes that have a disease annotation                                                                                                                                                                                                                                                                      | xls           | 40 KB       |
| SM8         | ER/SRC3 IP/MS                                                                                                                                                                                                                                                                                                                         | pdf           | 764 KB      |
| SM9         | Primer sequences used for quantitative real-time CR                                                                                                                                                                                                                                                                                   | xls           | 20 KB       |
