# Supplementary material
Source: PubMed Central journal article supplement (PMC2852354)
Supplement: me.2009-0499_2.pdf [file me.2009-0499_2.pdf]

### Supplementary Material 3: Validation Experiments

#### A) Identification of SRC-3 and RNA Polymerase II Binding Sites in MCF-7 Breast Cancer Chromatin by ChIP-chip

We previously used Genpathway's FactorPath and TranscriptionPath methods to identify possible SRC-3 target genes in MCF-7 cells [1]. To better understand the differences between the ChIP-seq and ChIP-chip approaches in this work, we replicated the genomic mapping for SRC-3 high affinity sites by hybridizing LM-PCR amplified SRC-3 DNA from E2 treated MCF-7 cells to the Affymetrix tiled microarrays. Data analysis using a threshold that produced a FDR of 1.29% identified a total of 6,364 SRC3\_E2 sites and 2,847 potential target genes that had SRC-3 tag sequences within a 10Kb gene margin. 2,538 tag sequences (about 40%) were not within 10Kb of any annotated genes (data not shown). Comparative analyses using different threshold settings showed that the different readouts in the two ChIP platforms produced highly compatible results, indicating that the bias introduced by amplification of the DNA fragments in the ChIP-chip method was negligible in this case. The figure below illustrates an example of a good peak correlation between the two ChIP platforms for the SLC22A5 gene, and the perfect alignment in the UCSC Genome Browser [2] of the SRC-3 tag sequences with ER and FoxA1 binding sites from the re-calculated ER and FoxA1 cistromes. For the analysis of the SRC-3 cartography presented in the paper we simply used the SRC3-ChIP-seq data.

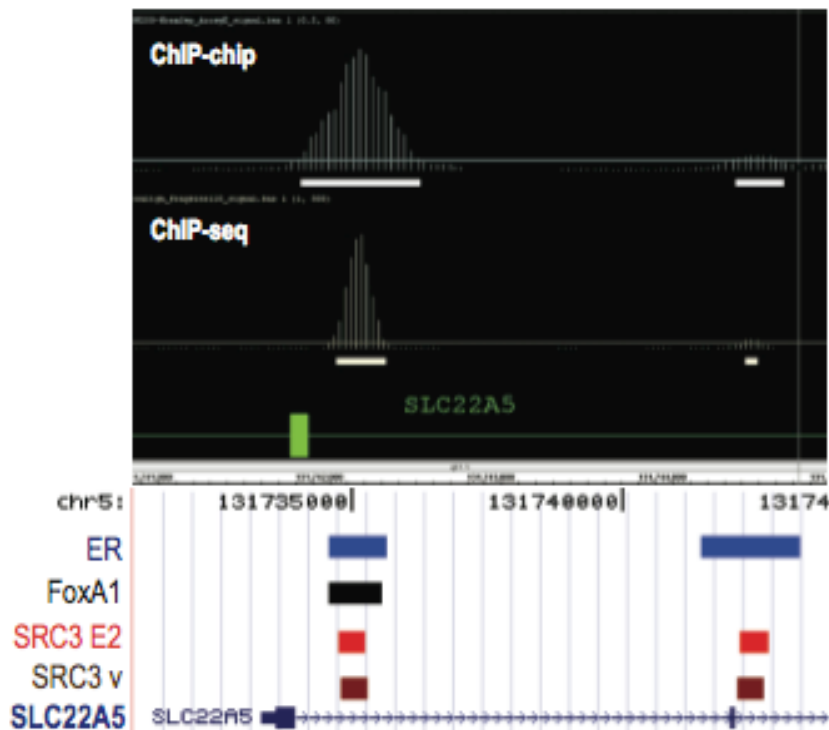

## B) IP Validation by Q-PCR

Real-time quantitative PCR on 126 randomly selected SRC-3 and Pol II ChIP target DNAs validate our ChIP assays; we found only one gene (RAPGEF1) for which recruitment was not increased upon E2 treatment of the MCF-7 cells. The SLC22A5 gene shown in the above figure, for example, measured a 42.5 fold increase in DNA over vehicle control sample.

| Name   | hg18  | start     | end       | Gene             | QPCR<br>NORM to<br>Untreated | NORM<br>Std Dev |
|--------|-------|-----------|-----------|------------------|------------------------------|-----------------|
| Val-1  | chr1  | 17719363  | 17719889  | <b>FLJ10521</b>  | 16.51                        | 2.79            |
| Val-2  | chr1  | 21440761  | 21440962  | <b>ECE1</b>      | 19.28                        | 0.92            |
| Val-3  | chr1  | 22671608  | 22671962  | <b>KIAA0478</b>  | 27.01                        | 2.42            |
| Val-4  | chr1  | 42098221  | 42098678  | <b>HIVEP3</b>    | 21.66                        | 4.72            |
| Val-5  | chr1  | 43176130  | 43176416  | <b>SLC2A1</b>    | 1.92                         | 2.19            |
| Val-6  | chr1  | 44069224  | 44069353  | <b>SIAT6</b>     | 32.47                        | 6.51            |
| Val-7  | chr1  | 108111313 | 108111862 | <b>VAV3</b>      | 5.82                         | 1.74            |
| Val-8  | chr1  | 108543172 | 108544297 | <b>SLC25A24</b>  | 7.91                         | 0.09            |
| Val-9  | chr1  | 114925317 | 114925887 | <b>BCAS2</b>     | 1.72                         | 0.27            |
| Val-10 | chr1  | 120375851 | 120376801 | <b>NOTCH2</b>    | 9.46                         | 0.89            |
| Val-11 | chr1  | 144434835 | 144435296 | <b>CD160</b>     | 13.98                        | 0.97            |
| Val-12 | chr1  | 162983974 | 162984653 | <b>PBX1</b>      | 6.97                         | 1.59            |
| Val-13 | chr1  | 167765202 | 167765567 | <b>F5</b>        | 31.74                        | 8.10            |
| Val-14 | chr1  | 177252240 | 177253052 | <b>FAM20B</b>    | 2.39                         | 0.08            |
| Val-15 | chr1  | 200505460 | 200505697 | <b>LGR6</b>      | 2.04                         | 0.07            |
| Val-16 | chr1  | 205143512 | 205143895 | <b>IL24</b>      | 17.88                        | 3.45            |
| Val-17 | chr1  | 216699867 | 216700095 | <b>TGFB2</b>     | 2.83                         | 0.49            |
| Val-18 | chr10 | 27189497  | 27190429  | <b>ABI1</b>      | 1.33                         | 0.64            |
| Val-19 | chr10 | 43988744  | 43989355  | <b>Clust10-9</b> | 20.00                        | *               |
| Val-20 | chr10 | 51217247  | 51217864  | <b>MSMB</b>      | 11.31                        | 0.63            |
| Val-21 | chr10 | 92670915  | 92671209  | <b>ANKRD1</b>    | 4.75                         | 0.88            |
| Val-22 | chr10 | 95184871  | 95185372  | <b>FER1L3</b>    | 20.00                        | *               |
| Val-23 | chr10 | 104460260 | 104460798 | <b>ARL3</b>      | 55.40                        | 9.42            |
| Val-24 | chr10 | 104918097 | 104918341 | <b>NT5C2</b>     | 15.33                        | 0.36            |
| Val-25 | chr11 | 20009901  | 20010303  | <b>NAV2</b>      | 19.75                        | 2.18            |
| Val-26 | chr11 | 30499374  | 30500156  | <b>C11orf8</b>   | 45.41                        | 4.40            |
| Val-27 | chr11 | 77648626  | 77649176  | <b>GAB2</b>      | 41.89                        | 4.65            |
| Val-28 | chr11 | 94218282  | 94218837  | <b>AMOTL1</b>    | 12.72                        | 0.85            |
| Val-29 | chr12 | 1746892   | 1747759   | <b>ADIPOR2</b>   | 15.02                        | 2.92            |
| Val-30 | chr12 | 51625148  | 51626471  | <b>KRT18</b>     | 10.92                        | 0.90            |
| Val-31 | chr12 | 52484267  | 52484890  | <b>LOC440100</b> | 12.03                        | 0.91            |
| Val-32 | chr13 | 38156703  | 38157327  | <b>FREM2</b>     | 20.00                        | *               |
| Val-33 | chr14 | 73845357  | 73845757  | <b>ABCD4</b>     | 6.25                         | 1.38            |
| Val-34 | chr15 | 37747821  | 37748288  | <b>FSIP1</b>     | 20.00                        | *               |
| Val-35 | chr15 | 62025103  | 62025468  | <b>DAPK2</b>     | 9.27                         | 1.34            |
| Val-36 | chr15 | 70215796  | 70215961  | <b>SENP8</b>     | 1.31                         | 0.21            |
| Val-37 | chr15 | 72721983  | 72722086  | <b>FLJ21128</b>  | 6.33                         | 0.90            |
| Val-38 | chr15 | 87465608  | 87465974  | <b>ABHD2</b>     | 13.16                        | 2.05            |
| Val-39 | chr15 | 94681200  | 94681490  | <b>NR2F2</b>     | 5.23                         | 0.84            |

|        |       |           |           |                   |       |      |
|--------|-------|-----------|-----------|-------------------|-------|------|
| Val-40 | chr16 | 73901356  | 73901558  | <b>CFDP1</b>      | 5.82  | 1.18 |
| Val-41 | chr17 | 1891864   | 1892108   | <b>OVCA2</b>      | 1.00  | 0.83 |
| Val-42 | chr17 | 9813008   | 9813203   | <b>GAS7</b>       | 5.46  | 0.04 |
| Val-43 | chr17 | 24429824  | 24429996  | <b>MYO18A</b>     | 3.98  | 0.74 |
| Val-44 | chr17 | 35858346  | 35858767  | <b>IGFBP4</b>     | 14.06 | 0.98 |
| Val-45 | chr17 | 36906475  | 36907031  | <b>KRTHA6</b>     | 2.85  | 0.56 |
| Val-46 | chr19 | 2475911   | 2476765   | <b>GNG7</b>       | 6.29  | 0.16 |
| Val-47 | chr19 | 7393000   | 7393142   | <b>ARHGEF18</b>   | 5.36  | 1.17 |
| Val-48 | chr19 | 9818468   | 9818572   | <b>PIN1</b>       | 3.54  | 0.64 |
| Val-49 | chr19 | 14816134  | 14816233  | <b>OR7A10</b>     | 4.25  | 0.96 |
| Val-50 | chr19 | 15457560  | 15458276  | <b>PGLYRP2</b>    | 8.15  | 1.53 |
| Val-51 | chr19 | 16794925  | 16795402  | <b>SIN3B</b>      | 7.03  | 1.83 |
| Val-52 | chr19 | 17763255  | 17763778  | <b>B3GNT3</b>     | 4.56  | 0.62 |
| Val-53 | chr19 | 40943635  | 40943839  | <b>HSPB6</b>      | 2.63  | 1.54 |
| Val-54 | chr19 | 44020435  | 44020576  | <b>HNRPL</b>      | 8.05  | 0.86 |
| Val-55 | chr19 | 45029821  | 45030018  | <b>FBL</b>        | 2.24  | 1.31 |
| Val-56 | chr19 | 49937019  | 49937840  | <b>BCL3</b>       | 7.23  | 0.68 |
| Val-57 | chr19 | 52120630  | 52120756  | <b>GRLF1</b>      | 5.30  | 1.51 |
| Val-58 | chr19 | 52347470  | 52347627  | <b>SAE1</b>       | 9.11  | 1.06 |
| Val-59 | chr19 | 52531710  | 52532508  | <b>GPR77</b>      | 12.39 | 0.32 |
| Val-60 | chr2  | 11589775  | 11591494  | <b>GREB1</b>      | 23.55 | 4.99 |
| Val-61 | chr2  | 43532909  | 43533587  | <b>THADA(1)</b>   | 38.27 | 4.21 |
| Val-62 | chr2  | 43558990  | 43559767  | <b>THADA(2)</b>   | 14.64 | 4.51 |
| Val-63 | chr2  | 238075929 | 238076157 | <b>MLPH</b>       | 15.35 | 0.96 |
| Val-64 | chr2  | 240658125 | 240658298 | <b>Clust2_36</b>  | 20.00 | *    |
| Val-65 | chr20 | 30092111  | 30092531  | <b>HCK</b>        | 14.14 | 3.17 |
| Val-66 | chr20 | 42776664  | 42777175  | <b>WISP2</b>      | 6.76  | 1.77 |
| Val-67 | chr20 | 48777155  | 48777963  | <b>PARD6B</b>     | 20.00 | *    |
| Val-68 | chr20 | 48813577  | 48814669  | <b>PARD6B</b>     | 10.00 | *    |
| Val-69 | chr20 | 51650499  | 51651859  | <b>ZNF217</b>     | 2.89  | 0.22 |
| Val-70 | chr20 | 51916416  | 51916594  | <b>slervar</b>    | 10.00 | *    |
| Val-71 | chr20 | 57762529  | 57762683  | <b>PHACTR3</b>    | 1.38  | 0.10 |
| Val-72 | chr21 | 32789694  | 32789842  | <b>C21orf63</b>   | 13.56 | 2.67 |
| Val-73 | chr21 | 35022864  | 35023000  | <b>CLIC6</b>      | 8.29  | 1.84 |
| Val-74 | chr21 | 38637655  | 38637800  | <b>ERG</b>        | 5.54  | 0.59 |
| Val-75 | chr21 | 40348272  | 40348505  | <b>DSCAM-K</b>    | 2.78  | 0.27 |
| Val-76 | chr21 | 40364567  | 40365125  | <b>DSCAM-J</b>    | 3.16  | 1.29 |
| Val-77 | chr21 | 40368398  | 40368940  | <b>DSCAM-I</b>    | 5.86  | 1.72 |
| Val-78 | chr21 | 40608133  | 40608590  | <b>DSCAM-H</b>    | 2.69  | 0.71 |
| Val-79 | chr21 | 40614441  | 40615128  | <b>DSCAM-G</b>    | 6.21  | 0.74 |
| Val-80 | chr21 | 40618192  | 40619029  | <b>DSCAM-F</b>    | 28.56 | 2.40 |
| Val-81 | chr21 | 40633827  | 40634940  | <b>DSCAM-E</b>    | 13.11 | 2.14 |
| Val-82 | chr21 | 40661772  | 40661908  | <b>DSCAM-D</b>    | 1.44  | 0.99 |
| Val-83 | chr21 | 40673465  | 40674396  | <b>DSCAM</b>      | 5.24  | 0.87 |
| Val-84 | chr21 | 40676456  | 40676865  | <b>DSCAM-C</b>    | 7.81  | 0.21 |
| Val-85 | chr21 | 40680513  | 40681154  | <b>DSCAM-B</b>    | 2.23  | 0.07 |
| Val-86 | chr21 | 40737823  | 40737970  | <b>DSCAM-A</b>    | 1.33  | 0.13 |
| Val-87 | chr21 | 41616235  | 41616379  | <b>FAM3B</b>      | 5.59  | 1.17 |
| Val-88 | chr21 | 42656549  | 42656988  | <b>TFF1 (ln1)</b> | 5.00  | *    |

|         |       |           |           |                  |       |      |
|---------|-------|-----------|-----------|------------------|-------|------|
| Val-89  | chr21 | 42659864  | 42660070  | <b>TFF1</b>      | 20.00 | *    |
| Val-90  | chr21 | 42668505  | 42669854  | <b>TMPRSS3</b>   | 27.68 | 2.19 |
| Val-91  | chr21 | 43956437  | 43957118  | <b>PDXK</b>      | 9.01  | 1.60 |
| Val-92  | chr21 | 45350388  | 45350580  | <b>ADARB1</b>    | 3.47  | 0.77 |
| Val-93  | chr21 | 45574636  | 45574745  | <b>C21orf93</b>  | 12.61 | 2.84 |
| Val-94  | chr22 | 28207795  | 28208167  | <b>NEFH</b>      | 5.23  | 0.64 |
| Val-95  | chr22 | 37650351  | 37650478  | <b>APOBEC3A</b>  | 4.99  | 0.60 |
| Val-96  | chr3  | 54362640  | 54363203  | <b>CACNA2D3</b>  | 20.00 |      |
| Val-97  | chr3  | 61718231  | 61718783  | <b>PTPRG</b>     | 2.79  | 0.49 |
| Val-98  | chr3  | 64451785  | 64452597  | <b>ADAMTS9</b>   | 4.16  | 0.12 |
| Val-99  | chr3  | 126264200 | 126265012 | <b>SLC12A8</b>   | 15.27 | 0.46 |
| Val-100 | chr3  | 158013023 | 158013164 | <b>LOC389169</b> | 22.81 | 0.14 |
| Val-101 | chr3  | 158013228 | 158013361 | <b>FLJ16641</b>  | 7.21  | 0.33 |
| Val-102 | chr3  | 158367042 | 158367264 | <b>CCNL1</b>     | 2.59  | 0.09 |
| Val-103 | chr3  | 195359472 | 195359789 | <b>HES1</b>      | 15.49 | 5.04 |
| Val-104 | chr4  | 15273512  | 15273710  | <b>FBXL5</b>     | 2.57  | 0.82 |
| Val-105 | chr4  | 38721444  | 38721576  | <b>KLHL5</b>     | 10.42 | 0.65 |
| Val-106 | chr4  | 90058656  | 90058787  | <b>FAM13A1</b>   | 1.07  | 0.25 |
| Val-107 | chr4  | 140806643 | 140806808 | <b>MGST2</b>     | 2.77  | 0.64 |
| Val-108 | chr4  | 140989921 | 140990207 | <b>MAML3</b>     | 8.49  | 1.27 |
| Val-109 | chr4  | 141390941 | 141391054 | <b>SCOC_prom</b> | 6.47  | 0.40 |
| Val-110 | chr4  | 141446117 | 141446265 | <b>SCOC_In1</b>  | 1.46  | 0.20 |
| Val-111 | chr5  | 35224055  | 35224270  | <b>PRLR</b>      | 15.12 | 4.03 |
| Val-112 | chr5  | 131742208 | 131742620 | <b>SLC22A5</b>   | 42.47 | 1.00 |
| Val-113 | chr5  | 132612580 | 132613575 | <b>FSTL4</b>     | 6.39  | 0.89 |
| Val-114 | chr6  | 17497510  | 17497918  | <b>CAP2</b>      | 20.00 | *    |
| Val-115 | chr6  | 30827236  | 30827658  | <b>IER3</b>      | 20.00 | *    |
| Val-116 | chr6  | 53437352  | 53438686  | <b>Clust6-7</b>  | 20.00 | *    |
| Val-117 | chr7  | 116551861 | 116552217 | <b>ST7</b>       | 20.49 | 0.89 |
| Val-118 | chr7  | 139116517 | 139119489 | <b>LOC389562</b> | 10.00 | *    |
| Val-119 | chr8  | 11625546  | 11625974  | <b>GATA4</b>     | 27.76 | 5.29 |
| Val-120 | chr8  | 79605057  | 79605509  | <b>PKIA</b>      | 13.14 | 5.78 |
| Val-121 | chr8  | 122232288 | 122232720 | <b>bobly</b>     | 20.00 |      |
| Val-122 | chr8  | 145102690 | 145102874 | <b>PLEC1</b>     | 8.37  | 0.37 |
| Val-123 | chr9  | 33405706  | 33405930  | <b>AQP7</b>      | 14.40 | 2.97 |
| Val-124 | chr9  | 84846624  | 84846954  | <b>RASEF</b>     | 10.56 | 0.57 |
| Val-125 | chr9  | 100349899 | 100350088 | <b>GPR51</b>     | 12.53 | 3.74 |
| Val-126 | chr9  | 133578150 | 133578483 | <b>RAPGEF1</b>   | 0.98  | 0.07 |

\* strong binding (query with different normalization)

1. Labhart, P., et al., *Identification of target genes in breast cancer cells directly regulated by the SRC-3/AIB1 coactivator*. Proc Natl Acad Sci U S A, 2005. **102**(5): p. 1339-44.
2. Kent, W.J., et al., *The human genome browser at UCSC*. Genome Res, 2002. **12**(6): p. 996-1006.
