# Supplementary material
Source: PubMed Central journal article supplement (PMC2852354)
Supplement: me.2009-0499_3.pdf [file me.2009-0499_3.pdf]

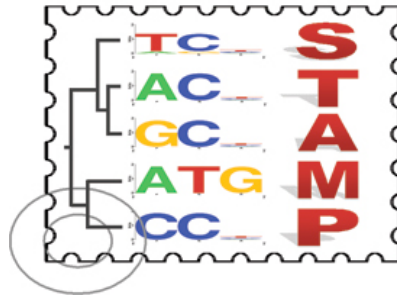

Jump to: [Multiple Alignment](#) [Motif Tree](#) [Motif Matching](#)

Input file: 153 motifs loaded

Settings: Metric=PCC, Alignment=SWU, Gap-open=1000, Gap-extend=1000, -nooverlapalign

Multiple Alignment=IR, Tree=UPGMA, Matching against: ALL

Note: All results files are removed nightly at midnight EST. Please save your results by saving "Webpage, complete".

[Download results as a PDF](#)

[Click here to run STAMP again.](#)

## Multiple Alignment

(Consensus sequence representations shown, but multiple alignment was carried out on the matrices)

```

6_bp_motif_1:  -----AGGTTCG-----
6_bp_motif_2:  -----GGGTCA-----
6_bp_motif_3:  -----GTTCGC-----
6_bp_motif_4:  -----CAGGGC-----
6_bp_motif_5:  -----CCAGGC-----
6_bp_motif_6:  -----TCGGGA-----
6_bp_motif_7:  -----GMGNCA-----
6_bp_motif_8:  -----CGGGTG-----
6_bp_motif_9:  -----GGAACG-----
6_bp_motif_10: -----CNGTGC-----
6_bp_motif_11: -----CCAGCT-----
6_bp_motif_12: -----TCGTGC-----
6_bp_motif_13: -----GTTTAC-----
6_bp_motif_14: -----CGGACA-----
6_bp_motif_15: -----CGTCTT-----
6_bp_motif_16: -----GTTCGT-----
6_bp_motif_17: -----GCAAGT-----
6_bp_motif_18: -----GGACTS-----
6_bp_motif_19: -----GGYATG-----
6_bp_motif_20: -----TCKTGG-----
6_bp_motif_pair_1: -----CAGGGCNNCGGG-----
6_bp_motif_pair_2: -----CCAGGCNNCGGG-----
6_bp_motif_pair_3: -----GCGNNSNNCGGG-----

```

Stamp Results

09/05/08

6\_bp\_motif\_pair\_4: -----CAGGGCNCAGGC-----  
6\_bp\_motif\_pair\_5: -----GCGNNSNCCAGGC-----  
6\_bp\_motif\_pair\_6: -----CAGGGCNCACCCG-----  
6\_bp\_motif\_pair\_7: -----GCGNNSNCAGGGC-----  
6\_bp\_motif\_pair\_8: -----CGTCTTNSNCCG-----  
6\_bp\_motif\_pair\_9: -----NCGGGNNCACCCG-----  
6\_bp\_motif\_pair\_10: -----CGGGTGNGCCTGG-----  
6\_bp\_motif\_pair\_11: -----NCGGGNNAGCTGG-----  
6\_bp\_motif\_pair\_12: -----CCAGGCNAGCTGG-----  
6\_bp\_motif\_pair\_13: -----CAGGGCNGCACGA-----  
6\_bp\_motif\_pair\_14: -----CCAGGCNAAGACG-----  
6\_bp\_motif\_pair\_15: -----CAGGGCNAAGACG-----  
6\_bp\_motif\_pair\_16: -----CCAGGCNGCACGA-----  
6\_bp\_motif\_pair\_17: -----TCGGGANGCACGA-----  
6\_bp\_motif\_pair\_18: -----GCACNGNGCCTGG-----  
6\_bp\_motif\_pair\_19: -----TCGGGANCTGTC-----  
6\_bp\_motif\_pair\_20: -----TCGGGRNAAGACG-----  
8\_bp\_motif\_1: -----AGGTCA-----  
8\_bp\_motif\_2: -----CYGTTTGC-----  
8\_bp\_motif\_3: -----CCTGCGGS-----  
8\_bp\_motif\_4: -----CYKGGCWS-----  
8\_bp\_motif\_5: -----CAGAGCAA-----  
8\_bp\_motif\_6: -----CTGGAATG-----  
8\_bp\_motif\_7: -----ACAGCTGC-----  
8\_bp\_motif\_8: -----CTGGTTTG-----  
8\_bp\_motif\_9: -----CTTGGAGG-----  
8\_bp\_motif\_10: -----TCAGCAGA-----  
8\_bp\_motif\_11: -----ACAGTGAG-----  
8\_bp\_motif\_12: -----TGANTCAT-----  
8\_bp\_motif\_13: -----GGAAGAGG-----  
8\_bp\_motif\_pair\_1: -----CCTGCGGSNCYKGGCWS-----  
8\_bp\_motif\_pair\_2: -----CYKGGCWSNCCTCNCC-----  
8\_bp\_motif\_pair\_3: -----CCTGCGGSNACAGCTGC-----  
8\_bp\_motif\_pair\_4: -----AGGKCAGNCCTGCGGS-----  
8\_bp\_motif\_pair\_5: -----CYKGGCWSNCAGRCAR-----  
8\_bp\_motif\_pair\_6: -----CTTGGAGGNSCCGCAGG-----  
8\_bp\_motif\_pair\_7: -----CCTGNNGSNCTCTTCC-----  
8\_bp\_motif\_pair\_8: -----CCTGCGGSNCAGAGCAR-----  
8\_bp\_motif\_pair\_9: -----AGGTCANNCYKGGCWS-----  
8\_bp\_motif\_pair\_10: -----CYKGGCWSNACAGCTGC-----  
8\_bp\_motif\_pair\_11: -----CYKGGCWSNCCTCCAAG-----  
8\_bp\_motif\_pair\_12: -----NAGGKCAGNMCAGCTGC-----  
8\_bp\_motif\_pair\_13: -----AGGTCASNCAGRCMR-----

## Stamp Results

09/05/08

```

8_bp_motif_pair_14: -----CTKGGCWGNNCAGCARR-----
8_bp_motif_pair_15: -----CAGAGCNNNNCAGCARR-----
8_bp_motif_pair_16: -----CARRGCMRNCCTCCAAG-----
8_bp_motif_pair_17: -----CCTGCGGSNACAGTGAG-----
8_bp_motif_pair_18: -----TCTGCTGANGCAGCTGT-----
8_bp_motif_pair_19: -----GGAAGAGGNGCAGCTGT-----
8_bp_motif_pair_20: -----CYKGGCWSNCATTCCAG-----
10_bp_motif_1: -----GGTCANNSTG-----
10_bp_motif_2: -----TRAGYAAACA-----
10_bp_motif_3: -----CCYCAGGS-----
10_bp_motif_4: -----TGASTCAN-----
10_bp_motif_5: -----SCWGWGCTGN-----
10_bp_motif_6: -----CARRCWGGAR-----
10_bp_motif_7: -----CCTGGSANNG-----
10_bp_motif_8: -----CTGRCMTKTS-----
10_bp_motif_9: -----GGAGGGGCAG-----
10_bp_motif_10: -----TGACAKCAG-----
10_bp_motif_11: -----CMNTSYTGGS-----
10_bp_motif_12: -----RACTKGTTT-----
10_bp_motif_13: -----CCARGGAGCT-----
10_bp_motif_14: -----GATNNTNATC-----
10_bp_motif_15: -----GMNGCAGACA-----
10_bp_motif_16: -----TGGAATGTNA-----
10_bp_motif_17: -----CAGKYTNTNT-----
10_bp_motif_18: -----AGATAANATC-----
10_bp_motif_19: -----CTGGGAAAAC-----
10_bp_motif_20: -----AGAACAAGGT-----
10_bp_motif_pair_1: -----GGAGGGGNAGNSCTGGSANNS-----
10_bp_motif_pair_2: -----GGAGGGGNAGNNCCYCAGGS-----
10_bp_motif_pair_3: -----SCCTGRGGNNCNCNTSCCAGS-----
10_bp_motif_pair_4: -----GGAGGGGCAGNNCWGWSCTGN-----
10_bp_motif_pair_5: -----SCTGGSANNGNSCWGWSCTGN-----
10_bp_motif_pair_6: -----SCCTGRGGNNNCAGSWCWGN-----
10_bp_motif_pair_7: -----SCCTGNRGNNNCTSMNSYCA-----
10_bp_motif_pair_8: -----TGRNNKCAGNNSCWGWGCTGN-----
10_bp_motif_pair_9: -----TGRNNKSAGNNGGAGGGGCAG-----
10_bp_motif_pair_10: -----GGAGGGGNAGNYTCCWGCYTG-----
10_bp_motif_pair_11: -----SCCTGRGGNNCMNTSYKGRS-----
10_bp_motif_pair_12: -----CMARGRAGCTNSCTGGSANNG-----
10_bp_motif_pair_13: -----SCCAGSARKNGGTCANNNTG-----
10_bp_motif_pair_14: -----YTCCWGYTGNNCWWSCTGN-----
10_bp_motif_pair_15: -----SYCMRSANKNGGAGGGGMAG-----
10_bp_motif_pair_16: -----SCCTGRGGNNCARRCWGGAR-----

```

Stamp Results

09/05/08

10\_bp\_motif\_pair\_17: -----TKTCTGCNKCNSTGGSANNG-----  
10\_bp\_motif\_pair\_18: -----SCTGGSANNNNYSCWGNKYG----  
10\_bp\_motif\_pair\_19: ---CTGMNSTCANCCYTCTGGS-----  
10\_bp\_motif\_pair\_20: -----SCTGGSARNNGGTCANNSTG-----  
12\_bp\_motif\_1: -----GGTCANNNTGAC-----  
12\_bp\_motif\_2: -----CWNWGYAAAYA-----  
12\_bp\_motif\_3: -----TGCCCCAGGGCA-----  
12\_bp\_motif\_4: -----NRRNTGASTCAN-----  
12\_bp\_motif\_5: -----CWGGKCAGGKCA-----  
12\_bp\_motif\_6: -----CAGRNCARMCAG-----  
12\_bp\_motif\_7: -----CCAGRGGNCWGS-----  
12\_bp\_motif\_8: -----CCAGCTKGGCTG-----  
12\_bp\_motif\_9: -----GGSTGGGGCWGG-----  
12\_bp\_motif\_10: -----RNGTGGCTCTGC-----  
12\_bp\_motif\_11: -----CAGGSWGNCAGN-----  
12\_bp\_motif\_12: -----CTGTGAGGTCAG-----  
12\_bp\_motif\_13: -----CCAGGTCWSCA-----  
12\_bp\_motif\_14: -----ANNNAAGGTCA-----  
12\_bp\_motif\_15: -----RARGSCTGKNTG-----  
12\_bp\_motif\_16: -----CTNTGGAATGTG-----  
12\_bp\_motif\_17: -----GCTGCTGGGAG-----  
12\_bp\_motif\_18: -----CCTGGGSTKKG-----  
12\_bp\_motif\_19: -----AGGTGACWKCTG-----  
12\_bp\_motif\_20: -----GSCAGRWGCAAA-----  
12\_bp\_motif\_pair\_1: --RGCCNNGSCNNGNGGSTGGGGSWGG-----  
12\_bp\_motif\_pair\_2: --YCTGCCWSCCTGNGGSTGGGGSWGG-----  
12\_bp\_motif\_pair\_3: CCAGRGGNCWGSNCNNGSCNNGGCY-----  
12\_bp\_motif\_pair\_4: -----GGSTGGGGSWGGNCCWGCTKGGCTG---  
12\_bp\_motif\_pair\_5: -----NCYCTGNGCTCCNSCWGNCCYCWGG---  
12\_bp\_motif\_pair\_6: -----GGSTGGGGSWGGNSCWGNCCYCTGG---  
12\_bp\_motif\_pair\_7: -----CCWSCCCASCCNCAGGGCTGGRAN-----  
12\_bp\_motif\_pair\_8: --SASAGCCMCAGNGGSTGGGGSWGG-----  
12\_bp\_motif\_pair\_9: --GCAGAGCCASNYNGGSTGGGGSWGG-----  
12\_bp\_motif\_pair\_10: -----CMNGSCNKGGCYNCCWGTNCCCWSM-----  
12\_bp\_motif\_pair\_11: -CCCAGCCCAGNNCNGSCNNGGCY-----  
12\_bp\_motif\_pair\_12: CCWSCCCASCCNRGNAGNAGGSA-----  
12\_bp\_motif\_pair\_13: --TGMAGGAKGMCNGGSTGGGGSWGG-----  
12\_bp\_motif\_pair\_14: --KSWGGNRCWGGNGGSWGGGGSWGG-----  
12\_bp\_motif\_pair\_15: -----CCWGGGGSCWGSNCAGNSWGNCAGN--  
12\_bp\_motif\_pair\_16: -----GGSTGGGGCWGGNCTGKYTGNYCTG---  
12\_bp\_motif\_pair\_17: -----CWGGGCAGGKCANCCWSCCCASCC-----  
12\_bp\_motif\_pair\_18: -----TGCCYCAGGGCANCCAGRGGNCWGS-----  
12\_bp\_motif\_pair\_19: -----CAGNSWGNCAGNNCAGGGCTGNRAM-----

12\_bp\_motif\_pair\_20: -NCTGSCWSCCTGNCCWGCTKGGCTG-----

**Familial Profile:**  
(click for matrix)

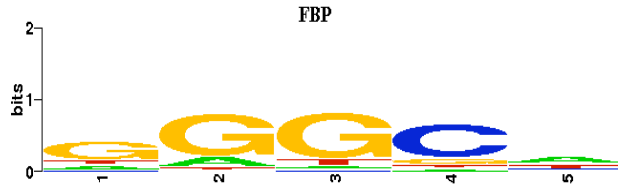

## Motif Tree

Tree (drawn by [Phylip](#))

[Click here for Newick-format tree](#) (viewable with [MEGA](#))

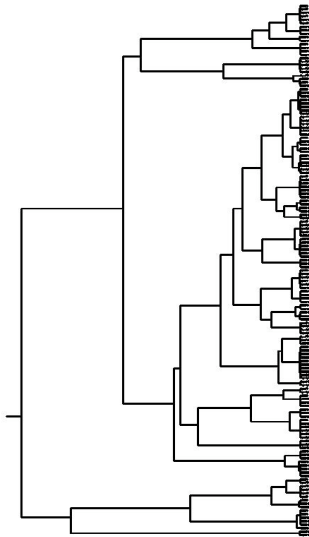

|  | Input Motif        | Best match in ALL                                       |
|--|--------------------|---------------------------------------------------------|
|  | <br>6 bp motif 1   | <br>QELEMENTZM13<br>QELEMENTZM13<br>(E val: 5.9379e-07) |
|  | <br>6 bp motif 2   | <br>CF1_M00112<br>CF1_M00112<br>(E val: 7.0080e-09)     |
|  | <br>12 bp motif 12 | <br>QELEMENTZM13<br>QELEMENTZM13<br>(E val: 2.0490e-07) |
|  | <br>8 bp motif 1   | <br>QELEMENTZM13<br>QELEMENTZM13<br>(E val: 5.4849e-11) |
|  | <br>12 bp motif 14 | <br>RORA_1<br>RORA_1<br>(E val: 2.0705e-08)             |

|                                                                                                               |                                                                                                                                                  |
|---------------------------------------------------------------------------------------------------------------|--------------------------------------------------------------------------------------------------------------------------------------------------|
|  <p>10 bp motif 8</p>       |  <p>PPAR_M00762<br/>PPAR_M00762<br/>(E val: 1.0368e-06)</p>   |
|  <p>10 bp motif 10</p>      |  <p>ATF1_M00691<br/>ATF1_M00691<br/>(E val: 6.6765e-07)</p>   |
|  <p>10 bp motif pair 19</p> |  <p>Tel-2_M00678<br/>Tel-2_M00678<br/>(E val: 2.0976e-04)</p> |
|  <p>12 bp motif 19</p>      |  <p>ALF2NTPARB<br/>ALF2NTPARB<br/>(E val: 3.2161e-07)</p>     |
|  <p>6 bp motif 14</p>      |  <p>NRSF_M00256<br/>NRSF_M00256<br/>(E val: 6.4603e-06)</p>  |
|  <p>6 bp motif 18</p>     |  <p>GCN4OSGLUB1<br/>GCN4OSGLUB1<br/>(E val: 1.2242e-04)</p> |
|  <p>6 bp motif 7</p>      |  <p>RTG3<br/>RTG3<br/>(E val: 1.1596e-07)</p>               |
|  <p>8 bp motif 12</p>     |  <p>GLMHVCHORD<br/>GLMHVCHORD<br/>(E val: 8.9669e-12)</p>   |
|                                                                                                               |                                                                                                                                                  |

|                                                                                                                |                                                                                                                                     |
|----------------------------------------------------------------------------------------------------------------|-------------------------------------------------------------------------------------------------------------------------------------|
|  <p>10 bp motif 4</p>        |  <p>GCN4<br/>(E val: 9.8410e-13)</p>             |
|  <p>12 bp motif 4</p>        |  <p>GLMHVCHORD<br/>(E val: 1.7434e-11)</p>       |
|  <p>6 bp motif 15</p>        |  <p>AAGACGTAGATACL12<br/>(E val: 1.3539e-08)</p> |
|  <p>6 bp motif pair 8</p>    |  <p>AAGACGTAGATACL12<br/>(E val: 5.0338e-04)</p> |
|  <p>6 bp motif pair 14</p>  |  <p>AtLEC2<br/>(E val: 3.3987e-04)</p>          |
|  <p>6 bp motif pair 15</p> |  <p>PacC_M00247<br/>(E val: 1.1559e-04)</p>    |
|  <p>6 bp motif pair 20</p> |  <p>flhCD<br/>(E val: 6.6855e-06)</p>          |
|  <p>6 bp motif 17</p>      |  <p>MarR_ec<br/>(E val: 6.3613e-06)</p>        |
|                                                                                                                |                                                                                                                                     |

|                                                                                                                |                                                                                                                                         |
|----------------------------------------------------------------------------------------------------------------|-----------------------------------------------------------------------------------------------------------------------------------------|
|  <p>6 bp motif 20</p>        |  <p>RbsR_SX<br/>(E val: 1.7536e-05)</p>              |
|  <p>8 bp motif 9</p>         |  <p>SBOXATRBCS<br/>(E val: 1.2177e-06)</p>           |
|  <p>8 bp motif pair 6</p>    |  <p>REGION1OSOSEM<br/>(E val: 3.5374e-06)</p>        |
|  <p>6 bp motif 4</p>         |  <p>MNF1ZMPPC1<br/>(E val: 1.8833e-05)</p>           |
|  <p>6 bp motif pair 1</p>   |  <p>AMMORESVDCRNIA1<br/>(E val: 9.1538e-08)</p>     |
|  <p>6 bp motif pair 4</p>  |  <p>AMMORESVDCRNIA1<br/>(E val: 1.1915e-05)</p>    |
|  <p>12 bp motif 11</p>     |  <p>CAC-binding_M00720<br/>(E val: 6.8153e-07)</p> |
|  <p>12 bp motif pair 2</p> |  <p>UF1H3BETA_M01068<br/>(E val: 5.8780e-07)</p>   |
|                                                                                                                |                                                                                                                                         |



|                                                                                                                |                                                                                                                                       |
|----------------------------------------------------------------------------------------------------------------|---------------------------------------------------------------------------------------------------------------------------------------|
| 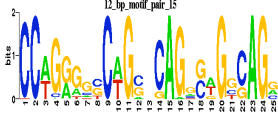 <p>12 bp motif pair 15</p>  |  <p>CAC-binding_M00720<br/>(E val: 1.1027e-05)</p> |
|  <p>12 bp motif pair 20</p>  |  <p>HEB_M00698<br/>(E val: 1.1389e-06)</p>         |
|  <p>12 bp motif pair 19</p>  |  <p>CAC-binding_M00720<br/>(E val: 3.9732e-06)</p> |
|  <p>10 bp motif 3</p>        |  <p>AP-2alphaA_M01045<br/>(E val: 1.3359e-07)</p>  |
|  <p>10 bp motif pair 2</p>  |  <p>TFAP2A<br/>(E val: 9.5223e-05)</p>            |
|  <p>10 bp motif pair 6</p> |  <p>TFAP2A<br/>(E val: 9.5223e-05)</p>           |
|  <p>10 bp motif pair 7</p> |  <p>HEN1_M00058<br/>(E val: 1.6821e-04)</p>      |
|  <p>10 bp motif pair 3</p> |  <p>RNFG2OS<br/>(E val: 1.3046e-07)</p>          |
|                                                                                                                |                                                                                                                                       |

|                                                                                                                 |                                                                                                                                         |
|-----------------------------------------------------------------------------------------------------------------|-----------------------------------------------------------------------------------------------------------------------------------------|
| 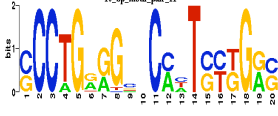 <p>10 bp motif pair 11</p>   |  <p>RNF205<br/>(E val: 1.4185e-07)</p>               |
|  <p>6 bp motif 5</p>          |  <p>AP-2_M00915<br/>(E val: 8.6298e-07)</p>          |
|  <p>6 bp motif pair 2</p>     |  <p>AMMORESVDCRNIA1<br/>(E val: 4.6282e-09)</p>      |
|  <p>12 bp motif 15</p>        |  <p>Zec_M01081<br/>(E val: 1.1421e-07)</p>           |
|  <p>12 bp motif 18</p>       |  <p>CAC-binding_M00720<br/>(E val: 1.6676e-07)</p>  |
|  <p>12 bp motif pair 11</p> |  <p>CAC-binding_M00720<br/>(E val: 2.8114e-06)</p> |
|  <p>12 bp motif 7</p>       |  <p>AMMORESVDCRNIA1<br/>(E val: 2.1744e-06)</p>    |
|  <p>12 bp motif pair 3</p>  |  <p>AMMORESVDCRNIA1<br/>(E val: 6.4637e-05)</p>    |
|                                                                                                                 |                                                                                                                                         |

|                                                                                                                |                                                                                                                                     |
|----------------------------------------------------------------------------------------------------------------|-------------------------------------------------------------------------------------------------------------------------------------|
| 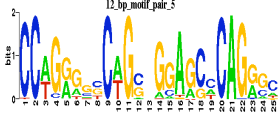 <p>12 bp motif pair 5</p>   |  <p>AtMYB-84_M00970<br/>(E val: 4.6032e-05)</p>  |
|  <p>12 bp motif pair 6</p>   |  <p>UF1H3BETA_M01068<br/>(E val: 5.0526e-08)</p> |
|  <p>12 bp motif pair 10</p>  |  <p>ABF1_M00399<br/>(E val: 7.8154e-07)</p>      |
|  <p>12 bp motif pair 14</p>  |  <p>ABF1_M00399<br/>(E val: 3.0672e-06)</p>      |
|  <p>8 bp motif 4</p>        |  <p>RIM101<br/>(E val: 3.2352e-08)</p>          |
|  <p>8 bp motif pair 9</p>  |  <p>QELEMENTZM13<br/>(E val: 3.3174e-07)</p>   |
|  <p>12 bp motif 8</p>      |  <p>YY1_M00069<br/>(E val: 1.4505e-10)</p>     |
|  <p>12 bp motif pair 4</p> |  <p>HEB_M00698<br/>(E val: 1.6500e-06)</p>     |
|                                                                                                                |                                                                                                                                     |

|                                                                                                                                         |                                                                                                                                                               |
|-----------------------------------------------------------------------------------------------------------------------------------------|---------------------------------------------------------------------------------------------------------------------------------------------------------------|
| <p>8 bp motif pair 2</p> 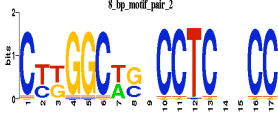 <p>8 bp motif pair 2</p>    | <p>RIM101</p>  <p>RIM101<br/>(E val: 2.3339e-05)</p>                       |
| <p>8 bp motif pair 11</p>  <p>8 bp motif pair 11</p>  | <p>myogenin_M00056</p>  <p>myogenin_M00056<br/>(E val: 4.0010e-06)</p>     |
| <p>8 bp motif pair 14</p>  <p>8 bp motif pair 14</p>  | <p>ABF1_M00401</p>  <p>ABF1_M00401<br/>(E val: 2.3310e-06)</p>             |
| <p>10 bp motif 7</p>  <p>10 bp motif 7</p>            | <p>MAZ_M00649</p>  <p>MAZ_M00649<br/>(E val: 8.8708e-06)</p>               |
| <p>10 bp motif pair 5</p>  <p>10 bp motif pair 5</p> | <p>FACB_M00389</p>  <p>FACB_M00389<br/>(E val: 4.1058e-05)</p>            |
| <p>10 bp motif 19</p>  <p>10 bp motif 19</p>        | <p>Ik-3_M00088</p>  <p>Ik-3_M00088<br/>(E val: 4.0042e-09)</p>           |
| <p>12 bp motif 17</p>  <p>12 bp motif 17</p>        | <p>ANAERO2CONSENSUS</p>  <p>ANAERO2CONSENSUS<br/>(E val: 1.8588e-07)</p> |
| <p>10 bp motif 13</p>  <p>10 bp motif 13</p>        | <p>Olf-1_M00261</p>  <p>Olf-1_M00261<br/>(E val: 4.6381e-06)</p>         |
| <p></p>                                                                                                                                 | <p></p>                                                                                                                                                       |

|                                                                                                                 |                                                                                                                                   |
|-----------------------------------------------------------------------------------------------------------------|-----------------------------------------------------------------------------------------------------------------------------------|
| 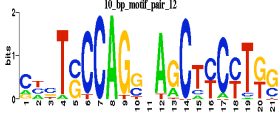 <p>10 bp motif pair 12</p>   |  <p>MAZ_M00649<br/>(E val: 5.4899e-05)</p>     |
|  <p>8 bp motif 5</p>          |  <p>XPF-1_M00684<br/>(E val: 6.2916e-06)</p>   |
|  <p>8 bp motif pair 15</p>    |  <p>HEB_M00698<br/>(E val: 1.6251e-04)</p>     |
|  <p>8 bp motif pair 16</p>    |  <p>SMb20537<br/>(E val: 6.1242e-05)</p>       |
|  <p>12 bp motif 5</p>        |  <p>QELEMENTZM13<br/>(E val: 4.1080e-07)</p>  |
|  <p>12 bp motif pair 17</p> |  <p>SMAD4_M00733<br/>(E val: 1.4426e-06)</p> |
|  <p>8 bp motif pair 5</p>   |  <p>rhaS<br/>(E val: 3.3835e-07)</p>         |
|  <p>8 bp motif pair 13</p>  |  <p>QELEMENTZM13<br/>(E val: 1.0747e-06)</p> |
|                                                                                                                 |                                                                                                                                   |

|                                                                                                                |                                                                                                                                         |
|----------------------------------------------------------------------------------------------------------------|-----------------------------------------------------------------------------------------------------------------------------------------|
| 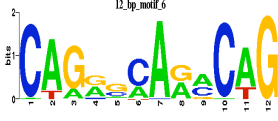 <p>12 bp motif 6</p>        |  <p>MarR_ec<br/>(E val: 1.5630e-06)</p>              |
|  <p>12 bp motif pair 16</p>  |  <p>CAC-binding_M00720<br/>(E val: 6.8703e-06)</p>   |
|  <p>12 bp motif 3</p>        |  <p>TFAP2A<br/>(E val: 2.3702e-06)</p>               |
|  <p>12 bp motif pair 18</p>  |  <p>AMMORESVDCRNIA1<br/>(E val: 6.4637e-05)</p>      |
|  <p>10 bp motif 17</p>      |  <p>grh<br/>(E val: 6.7987e-07)</p>                 |
|  <p>12 bp motif 10</p>     |  <p>SORLIP1<br/>(E val: 3.9455e-07)</p>            |
|  <p>12 bp motif pair 9</p> |  <p>CAC-binding_M00720<br/>(E val: 8.4158e-06)</p> |
|  <p>6 bp motif 11</p>      |  <p>HEB_M00698<br/>(E val: 7.5905e-09)</p>         |
|                                                                                                                |                                                                                                                                         |

|                                                                                                                 |                                                                                                                                    |
|-----------------------------------------------------------------------------------------------------------------|------------------------------------------------------------------------------------------------------------------------------------|
|  <p>6 bp motif pair 11</p>    |  <p>AtMYB-84_M00970<br/>(E val: 2.9306e-07)</p> |
|  <p>6 bp motif pair 12</p>    |  <p>LEGUMINBOXLEGA5<br/>(E val: 2.6417e-06)</p> |
|  <p>8 bp motif 7</p>          |  <p>AP-4_M00927<br/>(E val: 2.0371e-09)</p>     |
|  <p>8 bp motif pair 10</p>    |  <p>myogenin_M00712<br/>(E val: 6.4628e-07)</p> |
|  <p>8 bp motif pair 12</p>   |  <p>fadR<br/>(E val: 8.3766e-07)</p>           |
|  <p>10 bp motif 5</p>       |  <p>Eve_M00629<br/>(E val: 2.5169e-06)</p>    |
|  <p>10 bp motif pair 8</p>  |  <p>Eve_M00629<br/>(E val: 1.8556e-04)</p>    |
|  <p>10 bp motif pair 14</p> |  <p>Eve_M00629<br/>(E val: 2.2152e-04)</p>    |
|                                                                                                                 |                                                                                                                                    |

|                                                                                                                 |                                                                                                                                    |
|-----------------------------------------------------------------------------------------------------------------|------------------------------------------------------------------------------------------------------------------------------------|
| 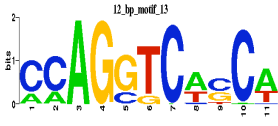 <p>12 bp motif 13</p>        |  <p>bZIP911_1<br/>(E val: 3.6010e-07)</p>       |
|  <p>8 bp motif 10</p>         |  <p>LMAF_M01139<br/>(E val: 4.8101e-10)</p>     |
|  <p>8 bp motif pair 18</p>    |  <p>Bel-1_M00312<br/>(E val: 6.8351e-09)</p>    |
|  <p>10 bp motif 15</p>        |  <p>SMAD4_M00733<br/>(E val: 6.8940e-06)</p>    |
|  <p>10 bp motif pair 17</p>  |  <p>MAZ_M00649<br/>(E val: 5.4899e-05)</p>     |
|  <p>12 bp motif 20</p>      |  <p>sna<br/>(E val: 3.2668e-05)</p>           |
|  <p>10 bp motif 6</p>       |  <p>Barbie_M00238<br/>(E val: 2.9175e-05)</p> |
|  <p>10 bp motif pair 16</p> |  <p>TFAP2A<br/>(E val: 9.5223e-05)</p>        |
|                                                                                                                 |                                                                                                                                    |



|                                                                                                                |                                                                                                                                       |
|----------------------------------------------------------------------------------------------------------------|---------------------------------------------------------------------------------------------------------------------------------------|
| 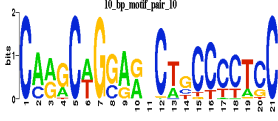 <p>10 bp motif pair 10</p>  |  <p>MAZ_M00649<br/>(E val: 9.9365e-05)</p>         |
|  <p>10 bp motif pair 18</p>  |  <p>MAZ_M00649<br/>(E val: 6.1165e-05)</p>         |
|  <p>8 bp motif 13</p>        |  <p>Nrf-2_M00108<br/>(E val: 2.4532e-08)</p>       |
|  <p>8 bp motif pair 7</p>    |  <p>Nrf-2_M00108<br/>(E val: 5.5746e-05)</p>       |
|  <p>8 bp motif pair 19</p>  |  <p>myogenin_M00712<br/>(E val: 6.7044e-07)</p>   |
|  <p>10 bp motif 9</p>      |  <p>UF1H3BETA_M01068<br/>(E val: 3.9237e-08)</p> |
|  <p>10 bp motif pair 9</p> |  <p>UF1H3BETA_M01068<br/>(E val: 1.9055e-07)</p> |
|  <p>10 bp motif pair 1</p> |  <p>PE3ASPHYA3<br/>(E val: 8.9793e-06)</p>       |
|                                                                                                                |                                                                                                                                       |

|                                                                                                                 |                                                                                                                                         |
|-----------------------------------------------------------------------------------------------------------------|-----------------------------------------------------------------------------------------------------------------------------------------|
| 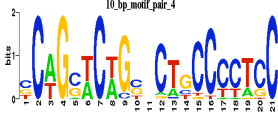 <p>10 bp motif pair 4</p>    |  <p>GAL4<br/>(E val: 7.6524e-07)</p>                 |
|  <p>12 bp motif 9</p>         |  <p>Alfin1_M00479<br/>(E val: 3.5246e-08)</p>        |
|  <p>12 bp motif pair 1</p>    |  <p>UF1H3BETA_M01068<br/>(E val: 8.8664e-06)</p>     |
|  <p>12 bp motif pair 7</p>    |  <p>UF1H3BETA_M01068<br/>(E val: 7.2530e-07)</p>     |
|  <p>12 bp motif pair 8</p>   |  <p>CAC-binding_M00720<br/>(E val: 8.4158e-06)</p>  |
|  <p>12 bp motif pair 12</p> |  <p>CAC-binding_M00720<br/>(E val: 1.0578e-05)</p> |
|  <p>12 bp motif pair 13</p> |  <p>CAC-binding_M00720<br/>(E val: 9.3693e-06)</p> |
|  <p>10 bp motif 11</p>      |  <p>LMAF_M01139<br/>(E val: 7.0766e-05)</p>        |
|                                                                                                                 |                                                                                                                                         |

|                                                                                                                |                                                                                                                                     |
|----------------------------------------------------------------------------------------------------------------|-------------------------------------------------------------------------------------------------------------------------------------|
| 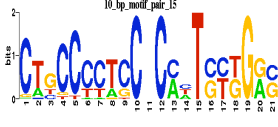 <p>10 bp motif pair 15</p>  |  <p>UF1H3BETA_M01068<br/>(E val: 4.5768e-08)</p> |
|  <p>6 bp motif 6</p>         |  <p>ANT_M00501<br/>(E val: 8.1812e-07)</p>       |
|  <p>6 bp motif pair 17</p>   |  <p>ABRECE3ZMRAB28<br/>(E val: 1.3223e-04)</p>   |
|  <p>6 bp motif 8</p>         |  <p>YDR026C<br/>(E val: 3.6408e-06)</p>          |
|  <p>6 bp motif pair 6</p>   |  <p>GCBP2ZMGAPC4<br/>(E val: 1.9908e-06)</p>    |
|  <p>6 bp motif pair 10</p> |  <p>RNFG2OS<br/>(E val: 6.1781e-06)</p>        |
|  <p>6 bp motif pair 9</p>  |  <p>Zic1_M00448<br/>(E val: 2.9132e-06)</p>    |
|  <p>6 bp motif 12</p>      |  <p>RHERPATEXPA7<br/>(E val: 2.1035e-06)</p>   |
|                                                                                                                |                                                                                                                                     |

|                                                                                                                |                                                                                                                                        |
|----------------------------------------------------------------------------------------------------------------|----------------------------------------------------------------------------------------------------------------------------------------|
| 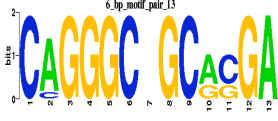 <p>6 bp motif pair 13</p>   |  <p>GRAZMRAB28<br/>(E val: 6.9807e-05)</p>          |
|  <p>6 bp motif pair 16</p>   |  <p>ABREMOTIFIIOSRAB16B<br/>(E val: 6.2461e-05)</p> |
|  <p>8 bp motif 3</p>         |  <p>AP-2_M00800<br/>(E val: 6.8282e-07)</p>         |
|  <p>8 bp motif pair 4</p>    |  <p>QELEMENTZMZM13<br/>(E val: 4.3466e-06)</p>      |
|  <p>8 bp motif pair 3</p>   |  <p>myogenin_M00712<br/>(E val: 6.7044e-07)</p>    |
|  <p>8 bp motif pair 17</p> |  <p>SORLIP5<br/>(E val: 2.1849e-05)</p>           |
|  <p>8 bp motif pair 1</p>  |  <p>RIM101<br/>(E val: 5.3733e-06)</p>            |
|  <p>8 bp motif pair 8</p>  |  <p>SKN7<br/>(E val: 8.3870e-05)</p>              |
|                                                                                                                |                                                                                                                                        |

|                                                                                                                |                                                                                                                                                |
|----------------------------------------------------------------------------------------------------------------|------------------------------------------------------------------------------------------------------------------------------------------------|
| 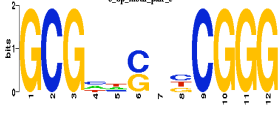 <p>6 bp motif pair 3</p>    |  <p>Mad<br/>(E val: 4.7888e-04)</p>                         |
|  <p>6 bp motif pair 7</p>    |  <p>Mad<br/>(E val: 5.3676e-06)</p>                         |
|  <p>6 bp motif pair 5</p>    |  <p>REST<br/>(E val: 1.6156e-04)</p>                        |
|  <p>6 bp motif 10</p>        |  <p>Pax5<br/>(E val: 3.3113e-05)</p>                        |
|  <p>6 bp motif pair 18</p>  |  <p>Pax-5_M00143<br/>(E val: 1.3153e-05)</p>               |
|  <p>6 bp motif pair 19</p> |  <p>ANT<br/>(E val: 1.8102e-09)</p>                       |
|  <p>8 bp motif 11</p>      |  <p>CIGMAUX28<br/>(E val: 5.9954e-11)</p>                 |
|  <p>10 bp motif 1</p>      |  <p>PPARgamma-RXRalpha_M00515<br/>(E val: 3.4102e-11)</p> |
|                                                                                                                |                                                                                                                                                |

|                                                                                                               |                                                                                                                                     |
|---------------------------------------------------------------------------------------------------------------|-------------------------------------------------------------------------------------------------------------------------------------|
|  <p>12 bp motif 1</p>       |  <p>ER_M00191<br/>(E val: 4.6629e-15)</p>        |
|  <p>10 bp motif pair 13</p> |  <p>NERF1a_M00531<br/>(E val: 5.0020e-08)</p>    |
|  <p>10 bp motif pair 20</p> |  <p>VDR_M00444<br/>(E val: 1.2588e-05)</p>       |
|  <p>6 bp motif 3</p>        |  <p>AMMORESIVDCRNIA1<br/>(E val: 9.1148e-06)</p> |
|  <p>6 bp motif 16</p>      |  <p>AACACOREOSGLUB1<br/>(E val: 4.4421e-06)</p> |
|  <p>6 bp motif 13</p>     |  <p>FOXD1<br/>(E val: 3.8041e-09)</p>          |
|  <p>10 bp motif 2</p>     |  <p>Freac-4_M00292<br/>(E val: 2.9218e-12)</p> |
|  <p>12 bp motif 2</p>     |  <p>Freac-4_M00292<br/>(E val: 1.1626e-09)</p> |
|                                                                                                               |                                                                                                                                     |

|                                                                                                                       |                                                                                                                                                         |
|-----------------------------------------------------------------------------------------------------------------------|---------------------------------------------------------------------------------------------------------------------------------------------------------|
|  <p><b>8 bp motif 2</b></p>         |  <p><b>Sn_M00044</b><br/>(E val: 2.6878e-07)</p>                     |
|  <p><b>8 bp motif 8</b></p>         |  <p><b>Grainyhead-Elf-1-NTF-1_M00951</b><br/>(E val: 8.6018e-11)</p> |
|  <p><b>10 bp motif 12</b></p>       |  <p><b>Grainyhead-Elf-1-NTF-1_M00951</b><br/>(E val: 2.6976e-09)</p> |
|  <p><b>10 bp motif 20</b></p>       |  <p><b>RORA_1</b><br/>(E val: 1.2075e-06)</p>                        |
|  <p><b>6 bp motif 9</b></p>        |  <p><b>shn-ZFP1</b><br/>(E val: 4.7754e-07)</p>                     |
|  <p><b>8 bp motif 6</b></p>       |  <p><b>Opaque-2_M00010</b><br/>(E val: 2.1242e-07)</p>             |
|  <p><b>8 bp motif pair 20</b></p> |  <p><b>RIM101</b><br/>(E val: 1.9865e-05)</p>                      |
|  <p><b>10 bp motif 16</b></p>     |  <p><b>TEAD1</b><br/>(E val: 9.1279e-08)</p>                       |
|                                                                                                                       |                                                                                                                                                         |

|                                                                                                          |                                                                                                                               |
|----------------------------------------------------------------------------------------------------------|-------------------------------------------------------------------------------------------------------------------------------|
| 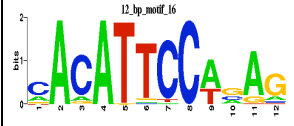 <p>12 bp motif 16</p> |  <p>TEAD1<br/>(E val: 2.2411e-08)</p>      |
|  <p>6 bp motif 19</p>  |  <p>GRAZMRAB28<br/>(E val: 4.9478e-07)</p> |
|  <p>10 bp motif 14</p> |  <p>BOX1PSGS2<br/>(E val: 2.3721e-08)</p>  |
|  <p>10 bp motif 18</p> |  <p>GLN3<br/>(E val: 9.7500e-13)</p>       |

### Motif Similarity Matches

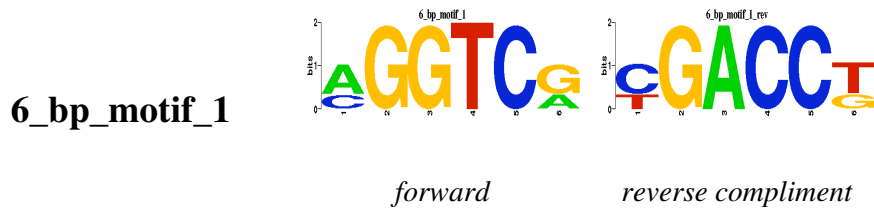

| Name           | E value    | Alignment                | Motif                                                                                 |
|----------------|------------|--------------------------|---------------------------------------------------------------------------------------|
| QELEMENTZM13   | 5.9379e-07 | CGACCT<br>TGACCT         |  |
| DREB1B_twoSite | 7.2123e-06 | AGGTCG----<br>AKGTCCGYMR |  |
| DREB1C_twoSite | 7.2123e-06 | AGGTCG----<br>AKGTCCGYMR |  |



|            |            |                                             |
|------------|------------|---------------------------------------------|
| OBF4_5     | 7.4322e-06 | --AGGTCG-----<br>GGAGGTCGTCATCAATGACATAAGAT |
| OBF5ATGST6 | 7.4322e-06 | --AGGTCG-----<br>GGAGGTCGTCATCAATGACATAAGAT |

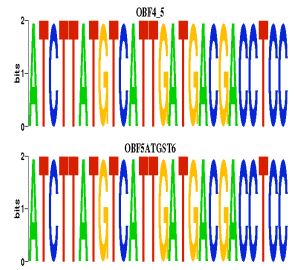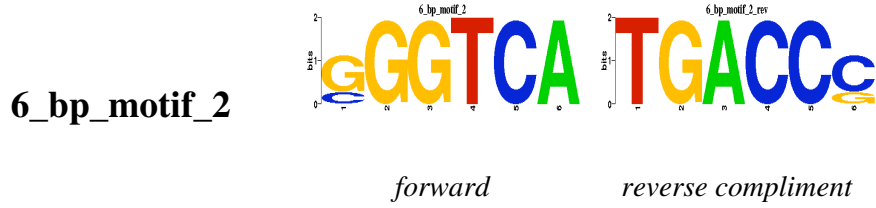

| <i>Name</i>  | <i>E value</i> | <i>Alignment</i>         | <i>Motif</i> |
|--------------|----------------|--------------------------|--------------|
| CF1_M00112   | 7.0080e-09     | --TGACCC<br>NGTGACCC     |              |
| CF1_M00111   | 1.8889e-08     | GGGTCA--<br>GGGTCANN     |              |
| usp          | 4.6742e-08     | -GGGTCA---<br>GGGGTCACNN |              |
| LF-A1_M00646 | 1.4653e-07     | -TGACCC<br>YWGASCC       |              |
| Hr46         | 3.9703e-07     | ----GGGTCA<br>AATTGGGTCA |              |

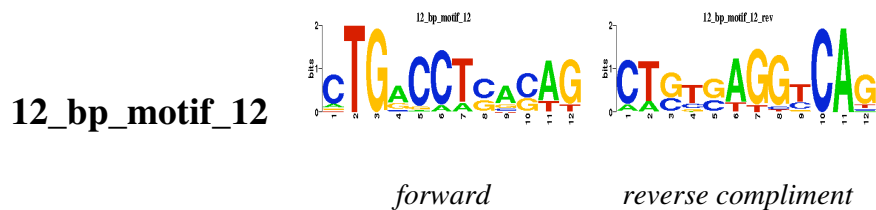

| <i>Name</i> | <i>E value</i> | <i>Alignment</i> | <i>Motif</i> |
|-------------|----------------|------------------|--------------|
|-------------|----------------|------------------|--------------|

|                  |            |                                 |
|------------------|------------|---------------------------------|
| QELEMENTZM13     | 2.0490e-07 | CTGACCTCACAG<br>-TGACCT-----    |
| PALINDROMICCBXGM | 5.4993e-06 | CTGACCTCACAG<br>-TGACGTCA---    |
| ATF1_M00691      | 7.4686e-06 | CTGTGAGGTCAG--<br>---TGACGTGANR |
| WBOXNTCHN48      | 7.6054e-06 | CTGACCTCACAG<br>CTGACY-----     |
| PXR_M01153       | 1.1835e-05 | CTGTGAGGTCAG<br>----NAGTTCA-    |

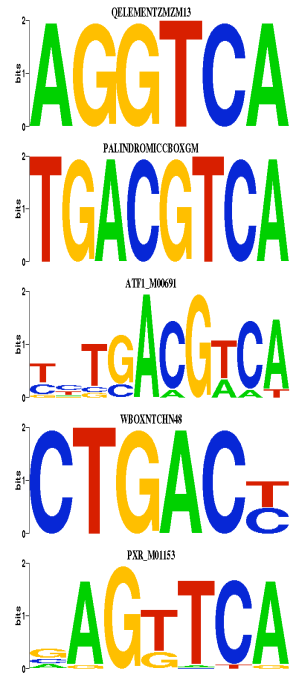

8\_bp\_motif\_1

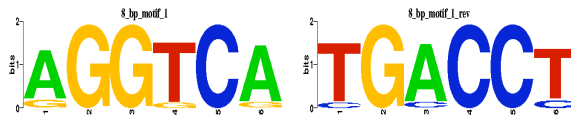

*forward*

*reverse compliment*

| Name             | E value    | Alignment                    |
|------------------|------------|------------------------------|
| QELEMENTZM13     | 5.4849e-11 | TGACCT<br>TGACCT             |
| RORA_1           | 2.8358e-08 | TGACCT----<br>TGACCTNNWW     |
| ER_M00959        | 3.0117e-08 | ----TGACCT<br>RNNNTGACCT     |
| RORalpha1_M00156 | 9.4815e-08 | -TGACCT-----<br>NTGACCTNNWWN |
| RORalpha2_M00157 | 9.9510e-08 | -TGACCT-----<br>NTGACCTANTTW |

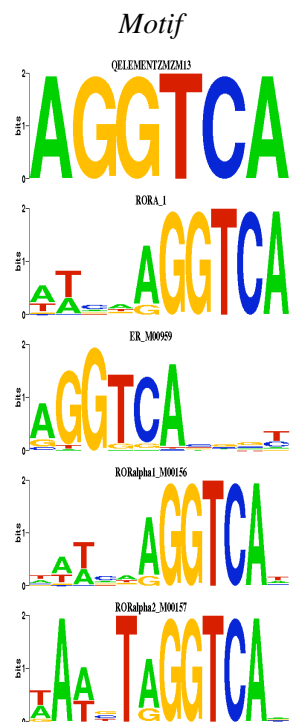

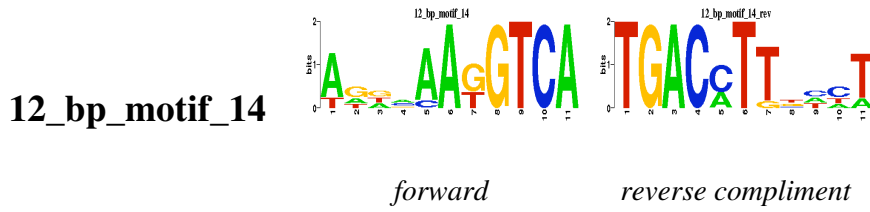

| Name             | E value    | Alignment                       | Motif |
|------------------|------------|---------------------------------|-------|
| RORA_1           | 2.0705e-08 | TGACCTTNNNT<br>TGACCTNNWW-      |       |
| ERR_M00511       | 8.8586e-08 | ANNNAAAGGTCA--<br>NNNNAAGGTCANN |       |
| QELEMENTZM3      | 2.0905e-07 | TGACCTTNNNT<br>TGACCT-----      |       |
| RORalpha1_M00156 | 4.5323e-07 | -TGACCTTNNNT<br>NTGACCTNNWWN    |       |
| PPAR,_M00762     | 1.6958e-06 | TGACCTTNNNT-<br>TGACCTTTGNCC    |       |

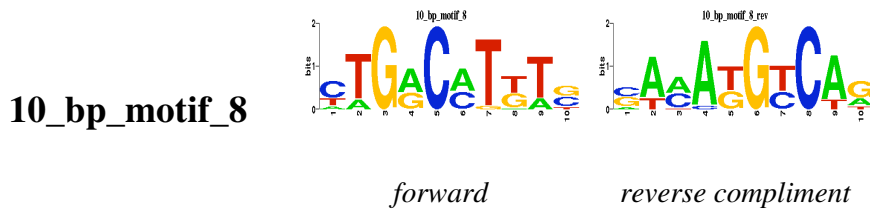

| Name              | E value    | Alignment                        | Motif |
|-------------------|------------|----------------------------------|-------|
| PPAR,_M00762      | 1.0368e-06 | CTGRCMTKTS---<br>-TGACCTTTGNCC   |       |
| HNF4alpha1_M00411 | 5.4272e-06 | ----SAMAKGYCAG<br>RGGNCAAAGGTCAN |       |

|             |            |                                       |
|-------------|------------|---------------------------------------|
| NR1H2-RXRA  | 5.8201e-06 | -----SAMAKGYCAG--<br>AAAGGTCAAAGGTCAS |
| HNF4A       | 6.0873e-06 | CTGRCMTKTS-----<br>-TGNMCTTTGNNCY     |
| HNF4_M01031 | 1.1832e-05 | CTGRCMTKTS---<br>NTGRMCTTTGNNC        |

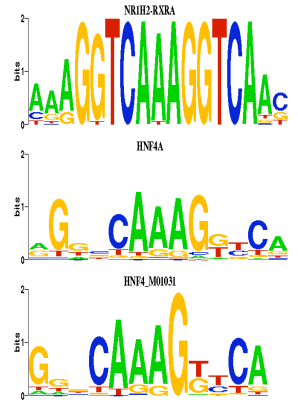

**10\_bp\_motif\_10**

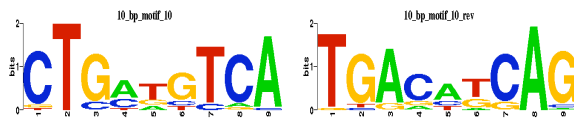

*forward*

*reverse compliment*

| Name              | E value    | Alignment                                      | Motif |
|-------------------|------------|------------------------------------------------|-------|
| ATF1_M00691       | 6.6765e-07 | TGACAKCAG--<br>TGACGTCANR                      |       |
| ATF3_M00513       | 1.0192e-06 | -CTGMTGTCA---<br>NSTGACGTCANCS                 |       |
| PALINDROMICCBOXGM | 1.6003e-06 | TGACAKCAG<br>TGACGTCA-                         |       |
| OBF4_5            | 2.9107e-06 | -----TGACAKCAG--<br>GGAGGTCGTCATCAATGACATAAGAT |       |
| OBF5ATGST6        | 2.9107e-06 | -----TGACAKCAG--<br>GGAGGTCGTCATCAATGACATAAGAT |       |

**10\_bp\_motif\_pair\_19**

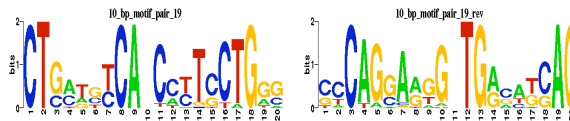

*forward*                      *reverse compliment*

*Name*                      *E value*                      *Alignment*                      *Motif*

|                   |            |                                                |                                                                                     |
|-------------------|------------|------------------------------------------------|-------------------------------------------------------------------------------------|
| Tel-2_M00678      | 2.0976e-04 | CTGMNSTCANCCYTCTGGS<br>-----TACTTCTG--         |  |
| AMMORESIIUDCRNIA1 | 2.4286e-04 | CTGMNSTCANCCYTCTGGS<br>-----ACCCTWCC----       |  |
| Skn-1_M00229      | 2.8809e-04 | SCCAGGARGGNTGASNKCAG<br>-----NNNATGACAWN--     |  |
| AhR_M00139        | 3.9921e-04 | -SCCAGGARGGNTGASNKCAG<br>CYCNRNSTNGCGTGASA---- |  |
| Spz1              | 5.4892e-04 | CTGMNSTCANCCYTCTGGS<br>--GCTGWTACCCT-----      |  |

**12\_bp\_motif\_19**

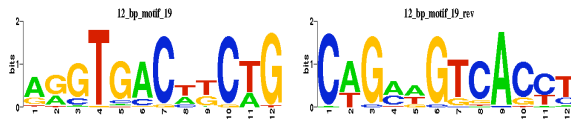

*forward*                      *reverse compliment*

|                |                |                                                             |                                                                                       |
|----------------|----------------|-------------------------------------------------------------|---------------------------------------------------------------------------------------|
| <i>Name</i>    | <i>E value</i> | <i>Alignment</i>                                            | <i>Motif</i>                                                                          |
| ALF2NTPARB     | 3.2161e-07     | ----CAGMWGTCACCT--<br>ACCTCACAAGTCTCCTCA                    |  |
| GLUTEBOX1OSGT2 | 3.7897e-05     | ----CAGMWGTCACCT--<br>ATATCATGAGTCACTTCA                    |  |
| WBOXHVIS01     | 1.0335e-04     | CAGMWGTCACCT<br>----AGTCA----                               |  |
| CGF1ATCAB2     | 1.3249e-04     | -----CAGMWGTCACCT-----<br>GTAACGTTTGTTATATCTGAAGTAATCTTTATC |  |

RBCSGBOXPS

1.4691e-04

CAGMWGTCACCT  
CACATGGCACT-

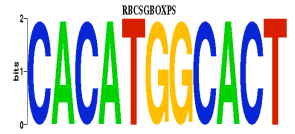

6\_bp\_motif\_14

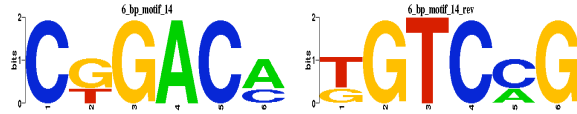

*forward*

*reverse compliment*

| Name           | E value    | Alignment                                |
|----------------|------------|------------------------------------------|
| NRSF_M00256    | 6.4603e-06 | -----CGGACA-----<br>TCAGCACCACGGACAGCRSC |
| NRSF_M01028    | 3.2919e-05 | ---TGTCCG-----<br>YNCTGTCCRYGGTGCTGA     |
| TGIF_M00418    | 6.2899e-05 | --CGGACA--<br>WNNTGACAGC                 |
| AUXREPSIAA4    | 8.2349e-05 | TGTCCG--<br>KGTCCCAT                     |
| REBETALGLHCB21 | 8.5096e-05 | TGTCCG<br>TATCCG                         |

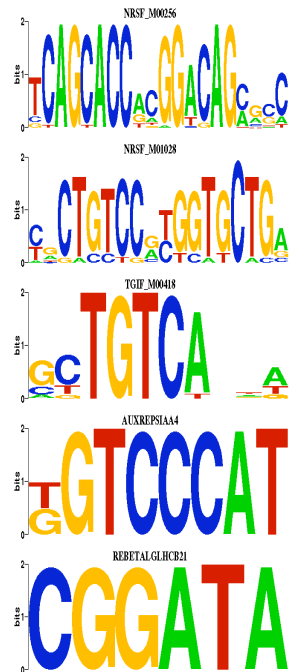

6\_bp\_motif\_18

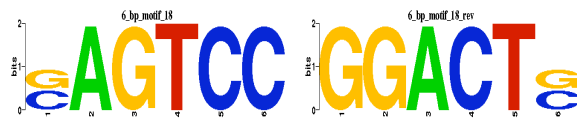

*forward*

*reverse compliment*

| Name        | E value    | Alignment          |
|-------------|------------|--------------------|
| GCN4OSGLUB1 | 1.2242e-04 | GGACTS-<br>TGACTCA |

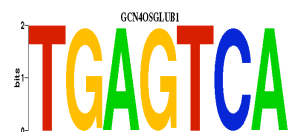

NF-kappaB\_M00208 2.0445e-04

----SAGTCC--  
NGGAAARTCCC

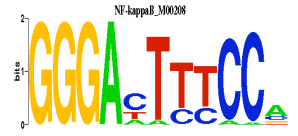

PALBOXAPC 2.5272e-04

SAGTCC  
CCGTCC

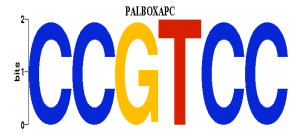

ARG81 3.1250e-04

-SAGTCC-  
NGAGTCAN

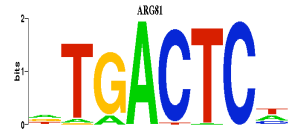

HNF4,\_M00967 3.3510e-04

SAGTCC--  
ARGTCCAN

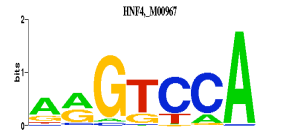

**6\_bp\_motif\_7**

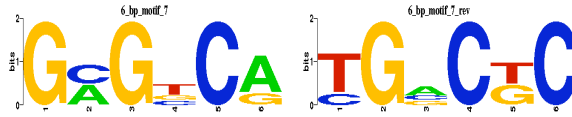

*forward*

*reverse compliment*

*Name*

*E value*

*Alignment*

*Motif*

RTG3

1.1596e-07

-GMGNCA-  
NGMGTCAT

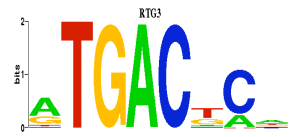

GCN4OSGLUB1

4.1637e-07

-GMGNCA  
TGAGTCA

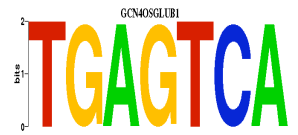

Bach2\_M00490

1.2403e-06

--TGNCKC--  
NNTGACTCAY

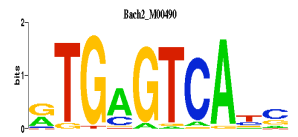

ARG81

1.8686e-06

-GMGNCA-  
NGAGTCAN

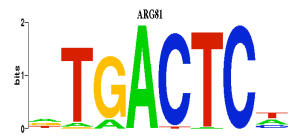

GCN4

2.2593e-06

-GMGNCA-  
TGAGTCAT

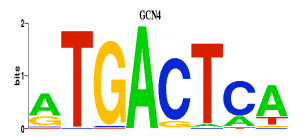

**8\_bp\_motif\_12**

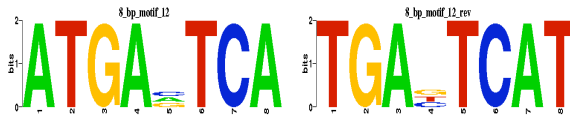

*forward*

*reverse compliment*

| Name                | E value    | Alignment                |
|---------------------|------------|--------------------------|
| GLMHVCHORD          | 8.9669e-12 | ATGANTCA-<br>ATGASTCAY   |
| GCN4                | 2.2985e-11 | TGANTCAT<br>TGAGTCAT     |
| minus300MOTIFZMZEIN | 9.6750e-11 | -TGANTCAT<br>RTGAGTCAT   |
| NF-E2_M00037        | 4.4288e-09 | ATGANTCA--<br>RTGACTCAGC |
| AP-1_M00199         | 5.5423e-09 | -TGANTCAT<br>NTGASTCA-   |

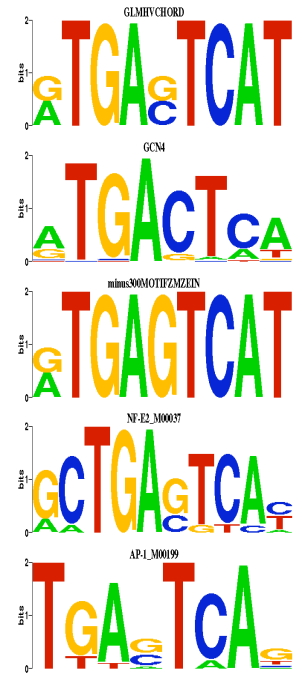

**10\_bp\_motif\_4**

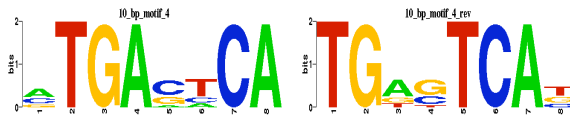

*forward*

*reverse compliment*

| Name                | E value    | Alignment              |
|---------------------|------------|------------------------|
| GCN4                | 9.8410e-13 | TGASTCAN<br>TGAGTCAT   |
| minus300MOTIFZMZEIN | 1.1107e-11 | NTGASTCA-<br>ATGACTCAY |

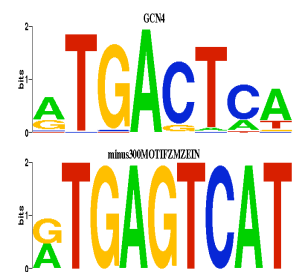



|              |            |                              |
|--------------|------------|------------------------------|
| GLMHVCHORD   | 1.2949e-11 | NTGASTCA-<br>ATGASTCAY       |
| GCN4OSGLUB1  | 7.8854e-11 | NTGASTCA<br>-TGACTCA         |
| Nrf-2_M00821 | 8.1284e-11 | -NTGASTCA---<br>NNTGACTCAGCA |

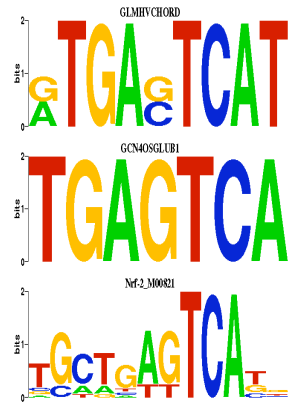

12\_bp\_motif\_4

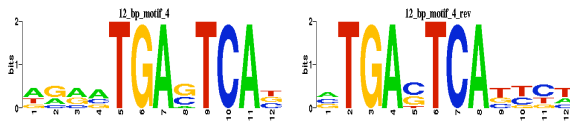

forward

reverse compliment

| Name                | E value    | Alignment                    | Motif                          |
|---------------------|------------|------------------------------|--------------------------------|
| GLMHVCHORD          | 1.7434e-11 | NRRNTGASTCAN<br>---ATGASTCAY | GLMHVCHORD<br>TGA TCA          |
| minus300MOTIFZMZEIN | 1.3206e-09 | NTGASTCANYYN<br>ATGACTCAY--- | minus300MOTIFZMZEIN<br>TGAGTCA |
| NF-E2_M00037        | 2.1445e-09 | NTGASTCANYYN<br>RTGACTCAGC-- | NF-E2_M00037<br>GCTGAGTCA      |
| GCN4                | 2.8144e-09 | NRRNTGASTCAN<br>----TGAGTCAT | GCN4<br>TGACTCA                |
| Fos                 | 6.3829e-09 | NRRNTGASTCAN<br>----TGANTCAC | Fos<br>TGA TCA                 |

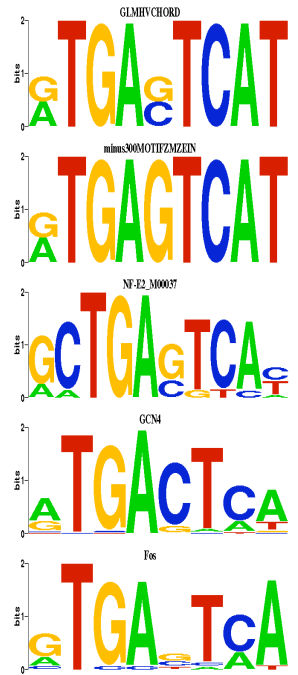

6\_bp\_motif\_15

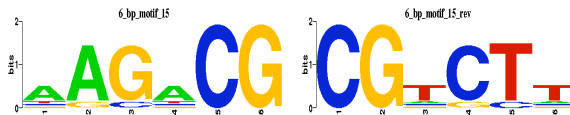

|                  | <i>forward</i> | <i>reverse compliment</i>                           |                                                                                     |
|------------------|----------------|-----------------------------------------------------|-------------------------------------------------------------------------------------|
| <i>Name</i>      | <i>E value</i> | <i>Alignment</i>                                    | <i>Motif</i>                                                                        |
| AAGACGTAGATACL12 | 1.3539e-08     | ---CGTCTT<br>CTACGTCTT                              |  |
| BlpR_PN          | 1.0736e-06     | -----CGTCTT-----<br>ATCTTGAATWGTTCATCGAAACNTCTTGAAT |  |
| ABREBZMRAB28     | 7.4257e-05     | AAGACG----<br>GAGACGTGGA                            |  |
| PEND_M01015      | 1.3418e-04     | -CGTCTT<br>ACTTCTT                                  |  |
| CDA1ATCAB2       | 2.4447e-04     | -CGTCTT-<br>GCGTTTTG                                |  |

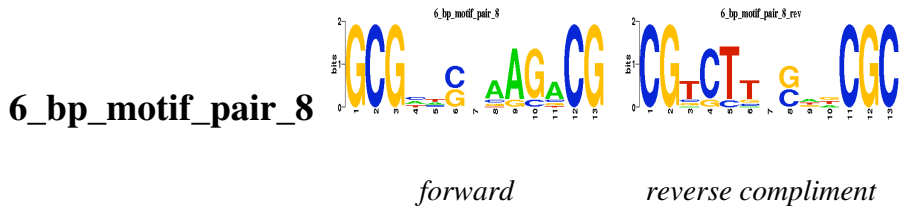

| <i>Name</i>      | <i>E value</i> | <i>Alignment</i>                   | <i>Motif</i>                                                                          |
|------------------|----------------|------------------------------------|---------------------------------------------------------------------------------------|
| AAGACGTAGATACL12 | 5.0338e-04     | GCGNNSNAAGACG---<br>-----AAGACGTAG |  |
| LS5              | 2.3295e-03     | GCGNNSNAAGACG-<br>----TCTATGACGT   |  |
| LS7ATPR1         | 2.3295e-03     | GCGNNSNAAGACG-<br>----TCTATGACGT   |  |
| STE11_M01005     | 2.5639e-03     | CGTCTTNSNNCGC<br>TTTCTTTGTTTC--    |  |

JERECRSTR

2.7998e-03

-----GCGNNSNAAGACG  
CTTTCAAAGAAGGCGGTCTAAGAG-

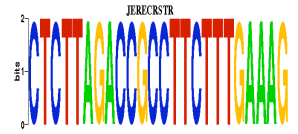

6\_bp\_motif\_pair\_14

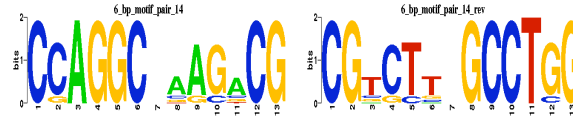

*forward*

*reverse compliment*

*Name*

*E value*

*Alignment*

*Motif*

AtLEC2

3.3987e-04

CGTCTTNGCCTGG-  
----TTGCATGNN

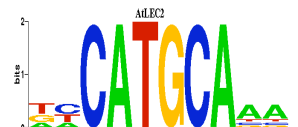

RNFG2OS

4.5838e-04

CCAGGCNAAGACG--  
CCAGGGGCACACTGG

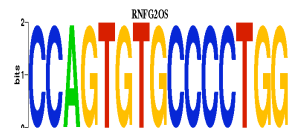

AAGACGTAGATACL12 5.0338e-04

CCAGGCNAAGACG---  
-----AAGACGTAG

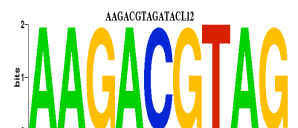

SOK2

7.5902e-04

CGTCTTNGCCTGG  
-----TTKCCTRN

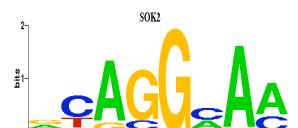

ALFINTPARC

8.9819e-04

CGTCTTNGCCTGG----  
TGTCATTGCTTGCGTAA

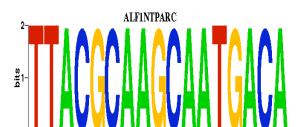

6\_bp\_motif\_pair\_15

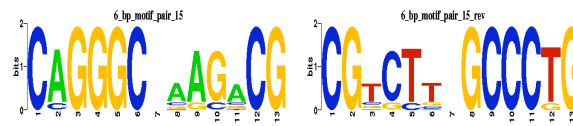

*forward*

*reverse compliment*

*Name*

*E value*

*Alignment*

*Motif*

PacC\_M00247

1.1559e-04

----CGTCTTNGCCCTG  
NNNNNNKCYTGCGNGN-

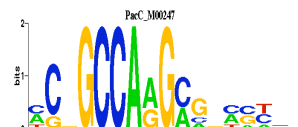

|                    |            |                                    |
|--------------------|------------|------------------------------------|
| AAGACGTAGATAACL12  | 5.0338e-04 | CAGGGCNAAGACG---<br>-----AAGACGTAG |
| EcRusp             | 1.6221e-03 | CAGGGCNAAGACG--<br>RAGGTCAATGACCYC |
| RIM101             | 2.3171e-03 | CGTCTTNGCCCTG<br>---CTTGCA---      |
| PROLAMINBOXOSGLUB1 | 2.3171e-03 | CAGGGCNAAGACG<br>---TGCAAAG---     |

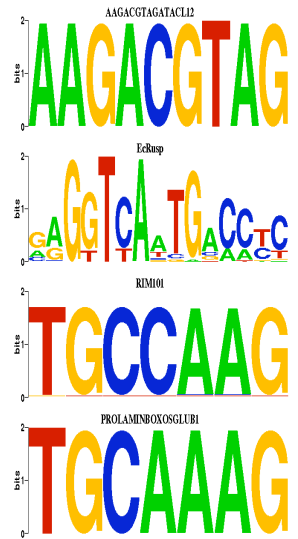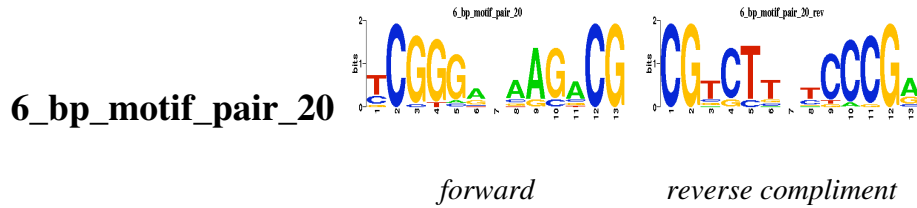

| Name         | E value    | Alignment                                            | Motif |
|--------------|------------|------------------------------------------------------|-------|
| flhCD        | 6.6855e-06 | -----CGTCTTNYCCCGA<br>NGNAAGCCCCAAATNCCGCCTCTTTTCCCC |       |
| E2Ff_oneSite | 1.6747e-05 | CGTCTTNYCCCGA-<br>----TTTTCCCGCG                     |       |
| E2F          | 1.0837e-04 | TCGGGRNAAGACG<br>GCGGGAAA-----                       |       |
| E2F_DP       | 1.0837e-04 | TCGGGRNAAGACG<br>GCGGGAAA-----                       |       |
| E2F1OSPCNA   | 1.0837e-04 | CGTCTTNYCCCGA<br>-----TTTCCCGC                       |       |

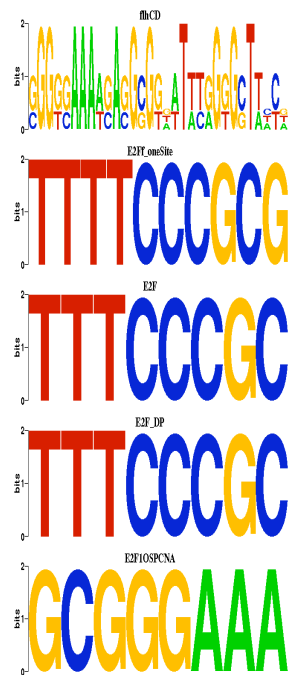

6\_bp\_motif\_17

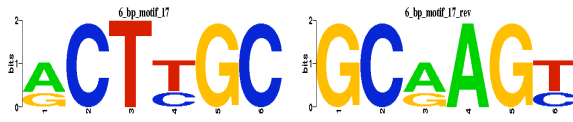

*forward*

*reverse compliment*

| Name          | E value    | Alignment                                       |
|---------------|------------|-------------------------------------------------|
| MarR_ec       | 6.3613e-06 | ---ACTTGC-----<br>ATTACTTGCCNGGGCAACCATT        |
| IDE2HVIDS2    | 7.4322e-06 | -----ACTTGC-----<br>AGTGACAGCGTGAAACTTGCCGTTCAA |
| marR          | 7.4322e-06 | -----GCAAGT-----<br>MWWWWRTTGCCWGGCAAGTAWWW     |
| Nkx2-5_M00240 | 5.5626e-05 | -ACTTGC<br>CACTTR-                              |
| p53_M00761    | 6.8288e-05 | --ACTTGC-<br>NGNCWTGYC                          |

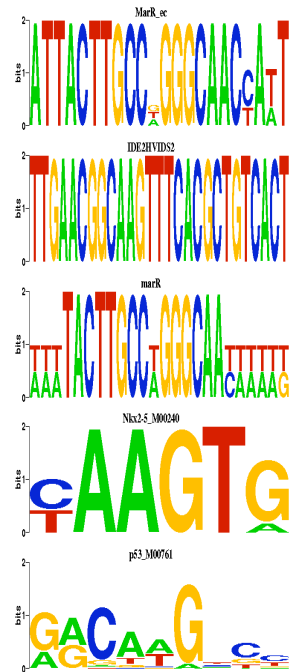

6\_bp\_motif\_20

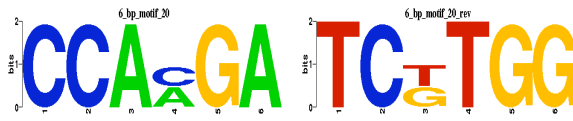

*forward*

*reverse compliment*

| Name       | E value    | Alignment                               |
|------------|------------|-----------------------------------------|
| RbsR_SX    | 1.7536e-05 | TCKTGG-----<br>TCGTGGAATCGATTACAYSG     |
| YY1_M00069 | 8.7095e-05 | -----CCAMGA-----<br>WNSANNCAAGATGGCNGNN |

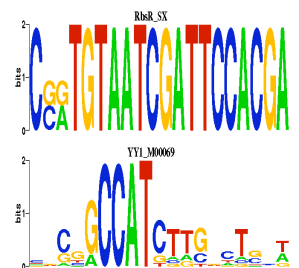

|            |            |                      |
|------------|------------|----------------------|
| RIM101     | 1.2242e-04 | TCKTGG--<br>-CTTGGCA |
| BOXIIPCCHS | 1.2242e-04 | -CCAMGA<br>GCCACGT   |
| IRO2OS     | 1.2242e-04 | CCAMGA-<br>CCACGTG   |

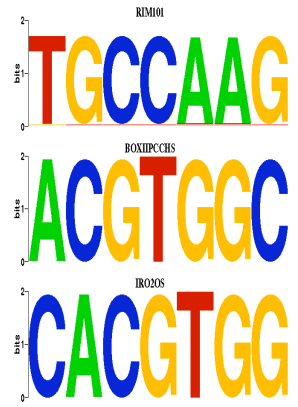

8\_bp\_motif\_9

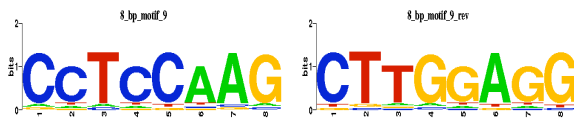

*forward*                      *reverse compliment*

| Name               | E value    | Alignment                      | Motif      |
|--------------------|------------|--------------------------------|------------|
| SBOXATRBCS         | 1.2177e-06 | --CCTCCAAG<br>CACCTCCA--       | CACCTCCA   |
| ACAAT_M00309       | 1.9806e-05 | CCTCCAAG<br>CCACCAAT           | ATTGGTGG   |
| E2F-1_M00430       | 1.9826e-05 | CCTCCAAG<br>CCGCSAA-           | TTGGCGG    |
| RBENTGA3           | 2.6591e-05 | CCTCCAAG-----<br>--TCCAAGTTGGA | TCCAACTTGA |
| NONAMERMOTIFTAH3H4 | 4.2744e-05 | -CTTGGAGG<br>CGTTGGATG         | CATCCAACG  |

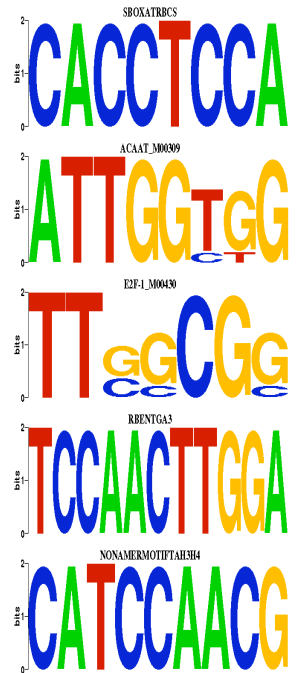

8\_bp\_motif\_pair\_6

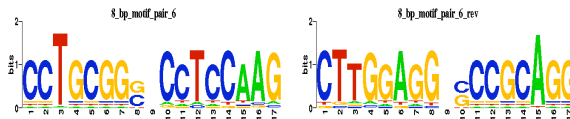

|               | <i>forward</i> | <i>reverse compliment</i>              |
|---------------|----------------|----------------------------------------|
| <i>Name</i>   | <i>E value</i> | <i>Alignment</i>                       |
| REGION1OSOSEM | 3.5374e-06     | CCTGCGGSNCCTCCAAG<br>-CGGCGGCTCGCCACG  |
| SBOXATRBCS    | 8.7571e-06     | CCTGCGGSNCCTCCAAG<br>-----CACCTCCA--   |
| IDRSZMFER1    | 2.2810e-04     | CCTGCGGSNCCTCCAAG<br>--CACGAGSCKCCAC-  |
| ABRECE3HVA1   | 2.4160e-04     | CCTGCGGSNCCTCCAAG<br>-ACGCGTGTCTC----  |
| GCBP2ZMGAPC4  | 2.9716e-04     | CCTGCGGSNCCTCCAAG<br>----CGGGCCCAC---- |

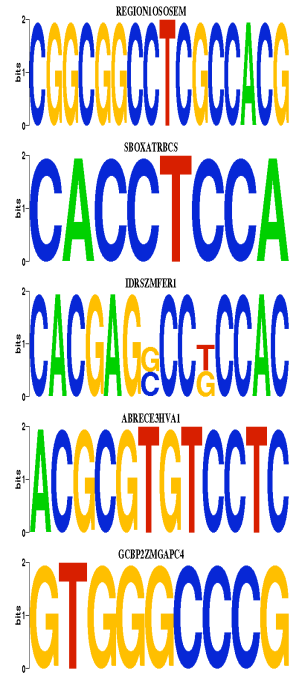

**6\_bp\_motif\_4**

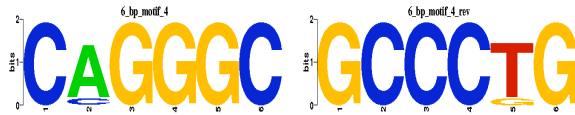

*forward*                      *reverse compliment*

| <i>Name</i>      | <i>E value</i> | <i>Alignment</i>                             |
|------------------|----------------|----------------------------------------------|
| MNF1ZMPPC1       | 1.8833e-05     | CAGGGC--<br>AAGGGCAC                         |
| marR             | 4.0921e-05     | -----GCCCTG-----<br>MWWWWRTTGCCCWGGCAAGTAWWW |
| ANAERO5CONSENSUS | 4.1712e-05     | --CAGGGC-<br>AACAGGGAA                       |
| Ttk_M00009       | 1.0615e-04     | -CAGGGC<br>GCAGGAC                           |

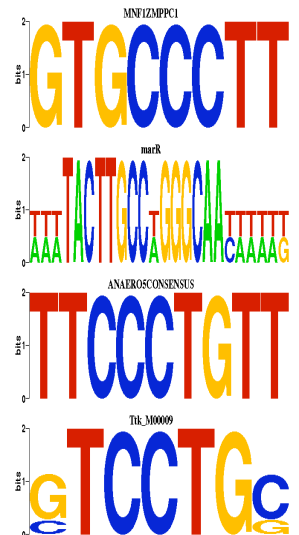

MarR\_ec

2.9316e-04

-----GCCCTG-----  
AATGGTTGCCCNCGCAAGTAAT

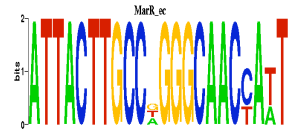

**6\_bp\_motif\_pair\_1**

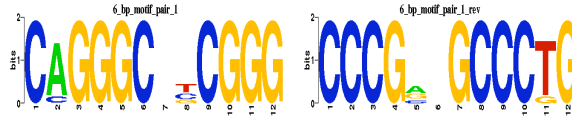

*forward*

*reverse compliment*

| Name             | E value    | Alignment                      |
|------------------|------------|--------------------------------|
| AMMORESVDCRNIA1  | 9.1538e-08 | CAGGGCNNCGGG<br>---GGCCCCGGG   |
| AP-2alpha_M00469 | 1.4662e-04 | CAGGGCNNCGGG<br>----SCNNNNGG   |
| ABI4             | 6.7828e-04 | CAGGGCNNCGGG<br>NGNNGCRSCG--   |
| TFAP2A           | 7.2791e-04 | CAGGGCNNCGGG-<br>----SCNNNNGGC |
| RE1ASPHYA3       | 9.5537e-04 | CCCGNNGCCCTG<br>-CCGCGCCCATG   |

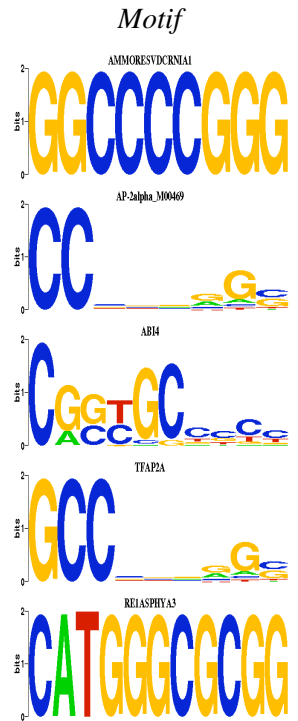

**6\_bp\_motif\_pair\_4**

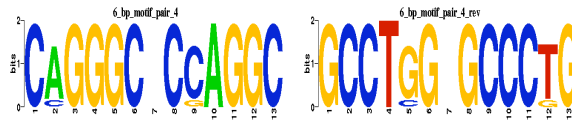

*forward*

*reverse compliment*

| Name            | E value    | Alignment                     |
|-----------------|------------|-------------------------------|
| AMMORESVDCRNIA1 | 1.1915e-05 | CAGGGCNCAGGC<br>---GGCCCCGGG- |

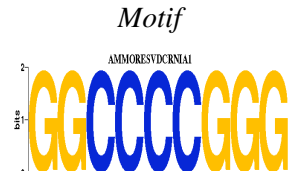



|               |            |                                 |  |
|---------------|------------|---------------------------------|--|
| brk           | 2.5673e-05 | CAGGGCNCAGGC<br>---RGCGCCRS--   |  |
| MNF1ZMPPC1    | 6.8275e-05 | CAGGGCNCAGGC<br>AAGGGCAC-----   |  |
| SZF1-1_M01109 | 7.1448e-05 | -GCCTGGNGCCCTG<br>CNGCTGWTACCTG |  |
| GBOX10NT      | 1.6285e-04 | CAGGGCNCAGGC<br>---GGCACGTGCC   |  |

**12\_bp\_motif\_11**

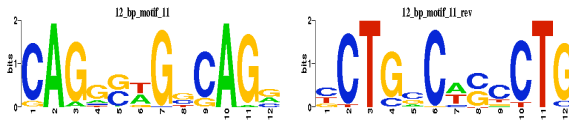

*forward*

*reverse compliment*

| Name               | E value    | Alignment                                                | Motif |
|--------------------|------------|----------------------------------------------------------|-------|
| CAC-binding_M00720 | 6.8153e-07 | NCTGNCWSCCTG<br>---CCCASCCY-                             |       |
| PSREGIONZM13       | 3.9562e-05 | -----NCTGNCWSCCTG-----<br>TTTGTCGGCTGCCCGTAGAAATAGTGCCGA |       |
| SZF1-1_M01109      | 5.6895e-05 | --NCTGNCWSCCTG<br>CNGCTGWTACCTG                          |       |
| Med                | 1.7322e-04 | CAGGSWNCAGN<br>GCGNCNGKSNT                               |       |
| ABRECE1HVA22       | 2.3737e-04 | CAGGSWNCAGN<br>-CCGGTGGCA--                              |       |

12\_bp\_motif\_pair\_2

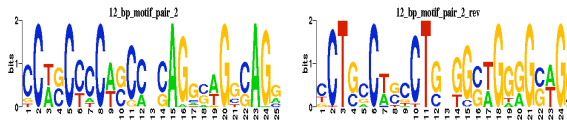

forward

reverse compliment

| Name                 | E value    | Alignment                                             |
|----------------------|------------|-------------------------------------------------------|
| UF1H3BETA_M01068     | 5.8780e-07 | YCTGCCWSCCTGNGGSTGGGGSWGG<br>-----GYGGGGGAGGGGC---    |
| CAC-binding_M00720   | 1.1830e-05 | CCWSCCCCASCCNCAGGSWGGCAGR<br>-----RGGSTGGG---         |
| GBF_M00633           | 2.1535e-05 | CCWSCCCCASCCNCAGGSWGGCAGR<br>-NACCCNA-----            |
| Sp3_M00665           | 3.0378e-05 | CCWSCCCCASCCNCAGGSWGGCAGR<br>----CCCYSCCAAGKS-----    |
| CACCC-binding_M00721 | 3.8824e-05 | YCTGCCWSCCTGNGGSTGGGGSWGG<br>-----ANCMNNWGGGTGNGG---- |

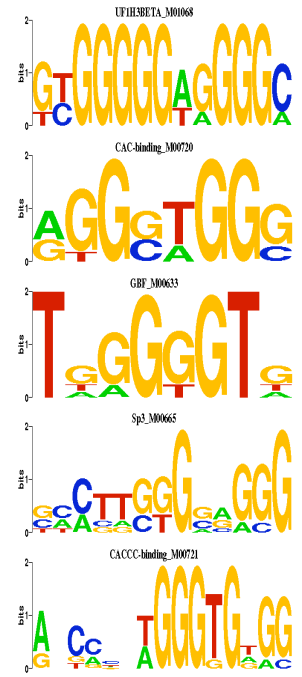

12\_bp\_motif\_pair\_15

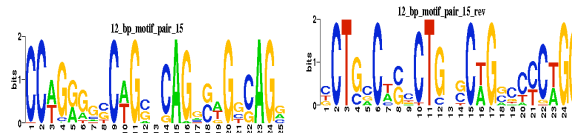

forward

reverse compliment

| Name               | E value    | Alignment                                  |
|--------------------|------------|--------------------------------------------|
| CAC-binding_M00720 | 1.1027e-05 | NCTGNCSNCTGNSCWGSCCCWGG<br>---CCASCY-----  |
| AMMORESVDCRNIA1    | 6.1940e-05 | CCWGGGSCWGSNCAGNSWGNCAGN<br>CCCGGGGCC----- |

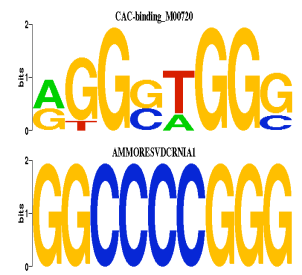

Stamp Results

09/05/08

|              |            |                                                |                                                                                     |
|--------------|------------|------------------------------------------------|-------------------------------------------------------------------------------------|
| Egr_M00807   | 3.3475e-04 | NCTGNCWSNCTGNSCWGSCCCCWGG<br>-----NYYGCSCCCA-- |  |
| Tra-1_M01048 | 1.8579e-03 | NCTGNCWSNCTGNSCWGSCCCCWGG<br>---ACCWCCC-----   |  |
| SITEIOSPCNA  | 3.2500e-03 | NCTGNCWSNCTGNSCWGSCCCCWGG<br>-----CCACCTGG     |  |

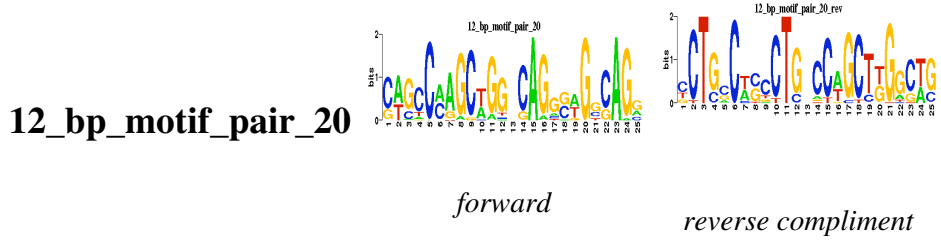

| <i>Name</i>        | <i>E value</i> | <i>Alignment</i>                                             | <i>Motif</i>                                                                          |
|--------------------|----------------|--------------------------------------------------------------|---------------------------------------------------------------------------------------|
| HEB_M00698         | 1.1389e-06     | CAGCCMAGCWGGNCAGGSWGSCAGN<br>-----CAGCWGG-----               |  |
| YY1_M00069         | 3.0764e-06     | NCTGSCWSCCTGNCCWGCTKGGCTG--<br>-----NNCNGCCATCTTGNNTSNW      |  |
| CAC-binding_M00720 | 1.1719e-05     | NCTGSCWSCCTGNCCWGCTKGGCTG<br>---CCCASCCY-----                |  |
| RIM101             | 1.7849e-04     | NCTGSCWSCCTGNCCWGCTKGGCTG<br>-----CTTGGCA--                  |  |
| myogenin_M00056    | 1.8055e-04     | -NCTGSCWSCCTGNCCWGCTKGGCTG--<br>NNYTGGCNSNGTGCCAAANNNNACAGST |  |

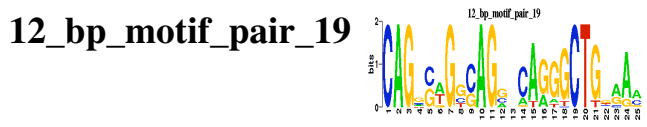

*forward*

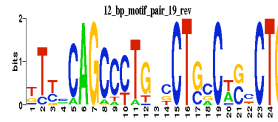

*reverse compliment*

| Name               | E value    | Alignment                                      |
|--------------------|------------|------------------------------------------------|
| CAC-binding_M00720 | 3.9732e-06 | KTYN CAGCCCTGNNCTGNCWSNCTG<br>-----CC CASC CY- |
| E2FAT              | 3.1598e-05 | KTYN CAGCCCTGNNCTGNCWSNCTG<br>TYTCCCGCC-----   |
| E2F                | 1.7928e-04 | CAGNSWGN CAGNNCAGGGCTGNRAM<br>-----GCGGGAAA    |
| E2F_DP             | 1.7928e-04 | CAGNSWGN CAGNNCAGGGCTGNRAM<br>-----GCGGGAAA    |
| E2F1OSPCNA         | 1.7928e-04 | KTYN CAGCCCTGNNCTGNCWSNCTG<br>TTTCCCGC-----    |

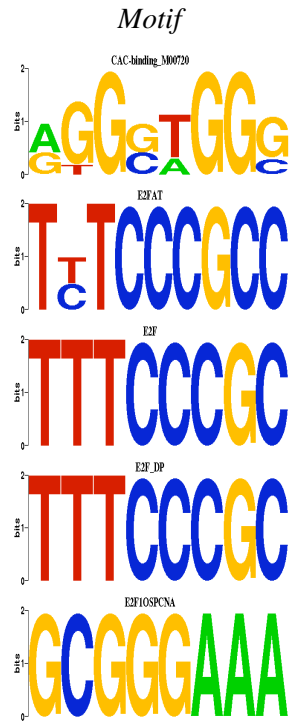

**10\_bp\_motif\_3**

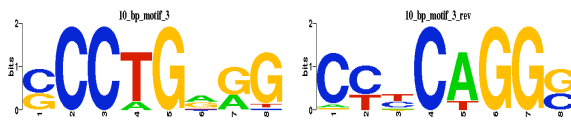

*forward*

*reverse compliment*

| Name              | E value    | Alignment                        |
|-------------------|------------|----------------------------------|
| AP-2alphaA_M01045 | 1.3359e-07 | ---SCCTGRGG---<br>NNNSCCTNAGGCNN |
| AP-2_M00915       | 1.6905e-06 | ---CCYCAGGS-<br>NNNCCNCNGGCN     |

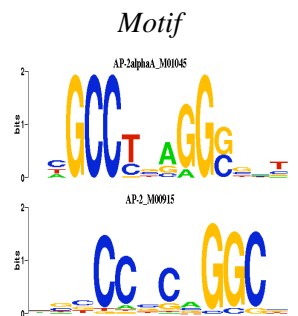

Stamp Results

09/05/08

AP-2alphaA\_M01047 3.8056e-06

---SCCTGRGG---  
ANMGCCTNAGGCKN

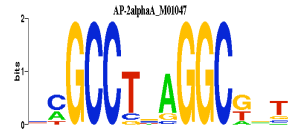

AP-2alpha\_M00469 5.6738e-06

SCCTGRGG  
SCNNNGG

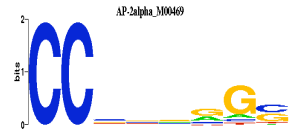

Olf-1\_M00261 1.5368e-05

-----SCCTGRGG-----  
NCMNNYTCCNRGGGANTNGN

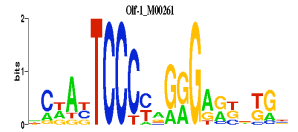

10\_bp\_motif\_pair\_2

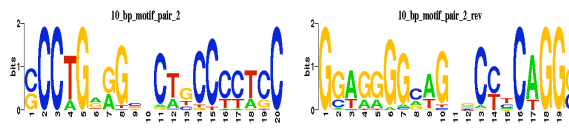

*forward*

*reverse compliment*

*Name*

*E value*

*Alignment*

*Motif*

TFAP2A

9.5223e-05

SCCTGRGGNCTNCCCCTCC  
SCNNNGGC-----

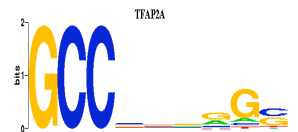

MAZ\_M00649

1.3023e-04

SCCTGRGGNCTNCCCCTCC-  
-----CCCTCCC

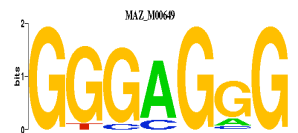

UF1H3BETA\_M01068 2.1169e-04

-----GGAGGGGAGNCCYCAGGS  
GYGGGGGAGGGGC-----

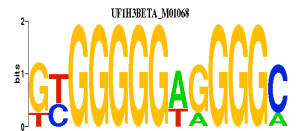

Dde\_M00304

2.8946e-04

SCCTGRGGNCTNCCCCTCC  
-----GCTCAGCC-----

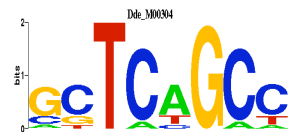

AP-2alphaA\_M01047 3.2616e-04

GGAGGGGAGNCCYCAGGS--  
-----ANMGCCTNAGGCKN

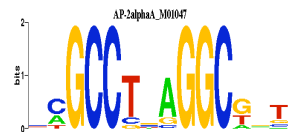

10\_bp\_motif\_pair\_6

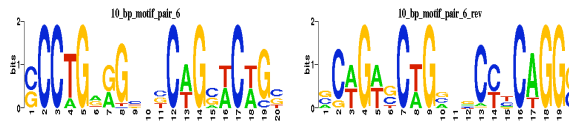

|                   | <i>forward</i> | <i>reverse compliment</i>                                |
|-------------------|----------------|----------------------------------------------------------|
| <i>Name</i>       | <i>E value</i> | <i>Alignment</i>                                         |
| TFAP2A            | 9.5223e-05     | SCCTGRGGNNNCAGSWCWGN<br>SCNNNNGGC-----                   |
| Pax-5_M00144      | 1.0641e-04     | NCWGWSTGNNNCCYCAGGS-----<br>NNNRYNGTYMCGCTYNANNNNNNCNNNY |
| AP-2alphaA_M01045 | 4.4591e-04     | ---SCCTGRGGNNNCAGSWCWGN<br>NNNSCCTNAGGCNN-----           |
| Eve_M00629        | 4.5758e-04     | NCWGWSTGNNNCCYCAGGS<br>GCNGNSSWN-----                    |
| Myf               | 1.6832e-03     | NCWGWSTGNNNCCYCAGGS<br>---CAGCAGYTGCYK-----              |

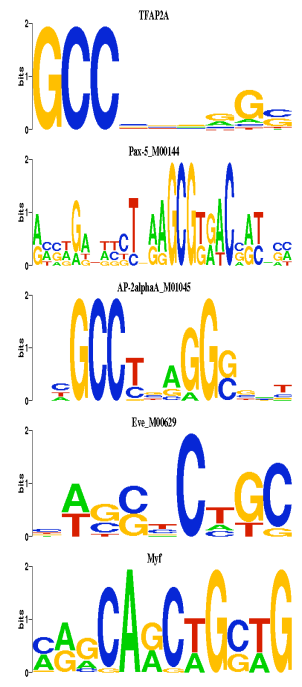

**10\_bp\_motif\_pair\_7**

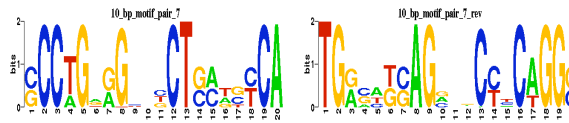

*forward*                      *reverse compliment*

| <i>Name</i> | <i>E value</i> | <i>Alignment</i>                               |
|-------------|----------------|------------------------------------------------|
| HEN1_M00058 | 1.6821e-04     | SCCTGNRGNNNCTSMNSYCA-<br>NNNGGNCGCAGCTGCGNCCNN |
| TFAP2A      | 2.3207e-04     | SCCTGNRGNNNCTSMNSYCA<br>SCNNNNGGC-----         |
| AP-4_M00005 | 4.5096e-04     | -TGRSNKSAGNNNCYNCAGGS<br>MNGNCNNCAGCTGNNNN---- |
| HSF_M00641  | 7.4432e-04     | TGRSNKSAGNNNCYNCAGGS<br>-----GAARCYNCKNGA      |

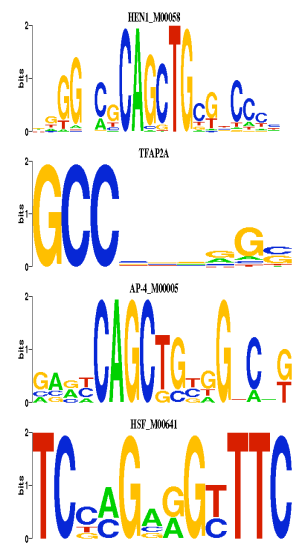

Stamp Results

09/05/08

AP-2alphaA\_M01045 8.4277e-04

---SCCTGNRGNNNCTSMNSYCA  
NNNSCCTNAGGCNN-----

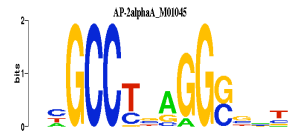

10\_bp\_motif\_pair\_3

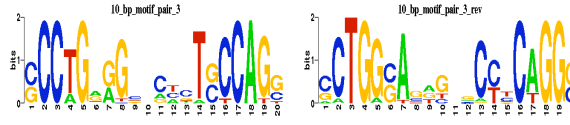

*forward*                      *reverse compliment*

| Name        | E value    | Alignment                                              | Motif |
|-------------|------------|--------------------------------------------------------|-------|
| RNFG2OS     | 1.3046e-07 | SCCTGRGGNNC NNTSCCAGS<br>-CCAGGGGCACACTGG----          |       |
| ANT         | 5.3016e-05 | SCCTGRGGNNC NNTSCCAGS<br>RCNTNGGGAWNTGTGC----          |       |
| TFAP2A      | 9.5223e-05 | SCCTGRGGNNC NNTSCCAGS<br>SCNNNGGC-----                 |       |
| MAZ_M00649  | 9.9123e-05 | SCCTGRGGNNC NNTSCCAGS<br>-----CCCTCC-----              |       |
| NRSE_M00325 | 2.2171e-04 | SCCTGRGGNNC NNTSCCAGS-----<br>-----GGCRCTCTCCNGGTGCTGA |       |

10\_bp\_motif\_pair\_11

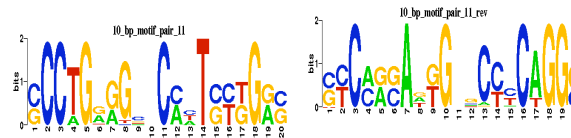

*forward*                      *reverse compliment*

| Name | E value | Alignment | Motif |
|------|---------|-----------|-------|
|------|---------|-----------|-------|

|                  |            |                                                    |
|------------------|------------|----------------------------------------------------|
| RNFG2OS          | 1.4185e-07 | SCCTGRGGNNCMNTSYKGRS<br>-CCAGGGGCACACTGG----       |
| SE1PVGRP18       | 1.1974e-06 | ---SYCMRSANKGNCCYCAGGS-<br>ATGCCCCACAGTGTGGCCATTAT |
| TFAP2A           | 2.8999e-05 | SCCTGRGGNNCMNTSYKGRS<br>SCNNNNGGC-----             |
| AP-2alpha_M01045 | 4.5518e-04 | ---SCCTGRGGNNCMNTSYKGRS<br>NNNSCTNAGGCNN-----      |
| AP-2alpha_M00469 | 6.9137e-04 | SCCTGRGGNNCMNTSYKGRS<br>SCNNNNGG-----              |

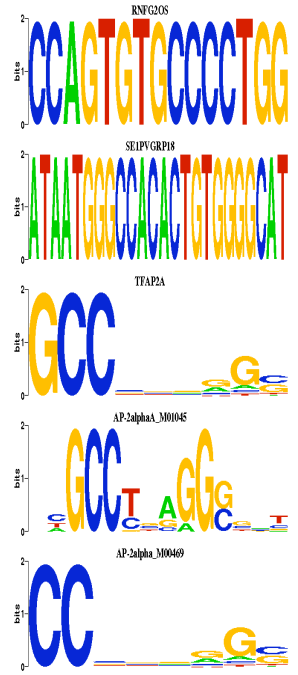

6\_bp\_motif\_5

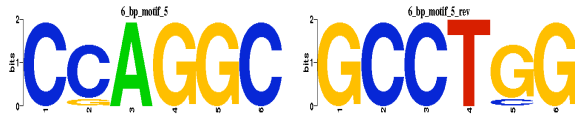

*forward*

*reverse compliment*

| Name        | E value    | Alignment                                   |
|-------------|------------|---------------------------------------------|
| AP-2_M00915 | 8.6298e-07 | -GCCTGG-----<br>NGCCNGNGGNNN                |
| SITEIOSPCNA | 1.8811e-05 | --GCCTGG<br>CCACCTGG                        |
| marR        | 2.7644e-05 | -----CCAGGC-----<br>MWWWWRTTGCCCGGCAAGTAWWW |
| RFX1_M00280 | 9.2631e-05 | -----CCAGGC-----<br>NNGTTRCYWNGYNACN        |
| MarR_ec     | 1.2847e-04 | -----CCAGGC-----<br>AATGGTTGCCCGGCAAGTAAT   |

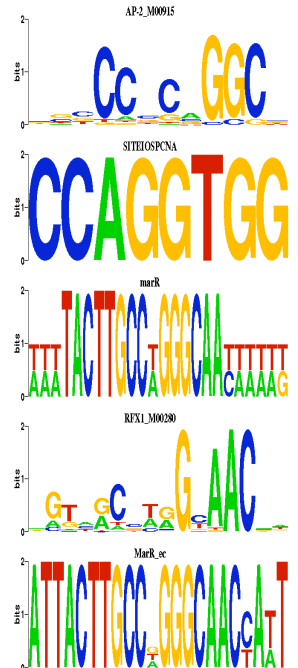



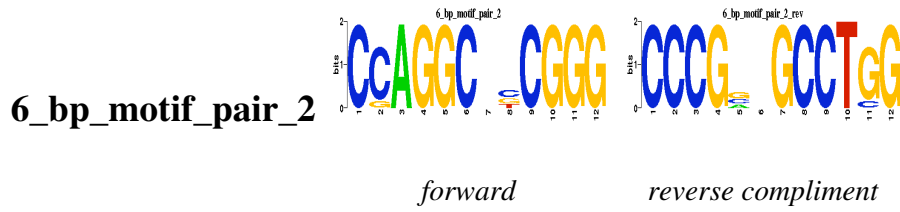

| Name             | E value    | Alignment                              | Motif                         |
|------------------|------------|----------------------------------------|-------------------------------|
| AMMORESVDCRNIA1  | 4.6282e-09 | CCAGGCNNCGGG<br>---GGCCCCGGG           | AMMORESVDCRNIA1<br>GGCCCCGGGG |
| AP-2alpha_M00469 | 9.6236e-05 | CCAGGCNNCGGG<br>----SCNNNNGG           | AP-2alpha_M00469<br>CC        |
| E12_M00693       | 1.9144e-04 | CCCGNNGCCTGG<br>--NNNCACCTGY           | E12_M00693<br>CAGGTG          |
| TFAP2A           | 4.4692e-04 | -CCCGNNGCCTGG<br>SCNNNNGGC----         | TFAP2A<br>GCC                 |
| NERF1a_M00531    | 7.4285e-04 | ----CCCGNNGCCTGG-<br>SNNASNYRCTTCCTGNY | NERF1a_M00531<br>CAGGAG       |

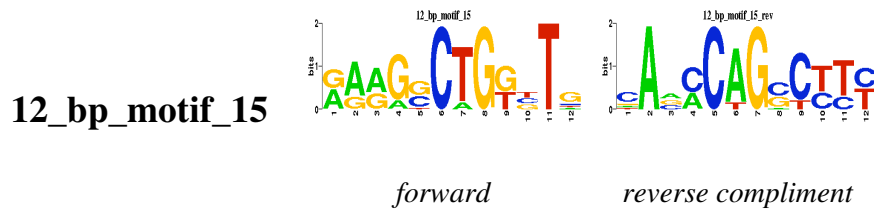

| Name               | E value    | Alignment                      | Motif                          |
|--------------------|------------|--------------------------------|--------------------------------|
| Zec_M01081         | 1.1421e-07 | -CANMCAGSCYTY<br>GCAACCAACCTT- | Zec_M01081<br>AAGGTTGGTTGC     |
| CAC-binding_M00720 | 1.1715e-05 | RARGSCTGKNTG<br>--RGGSTGGG--   | CAC-binding_M00720<br>AGGTTGGG |

|              |            |                                          |
|--------------|------------|------------------------------------------|
| SMAD4_M00733 | 3.7054e-04 | RARGSCTGKNTG-----<br>---RGNTGKCTGNMYSN   |
| IDE1HVIDS2   | 4.7555e-04 | ----RARGSCTGKNTG--<br>GCAAGAAGCATGCTTGAT |
| MTF-1_M00650 | 5.5027e-04 | RARGSCTGKNTG---<br>--GGGCCGNGTGCAN       |

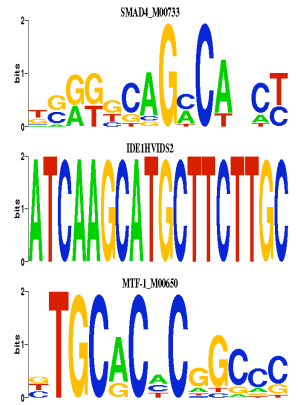

**12\_bp\_motif\_18**

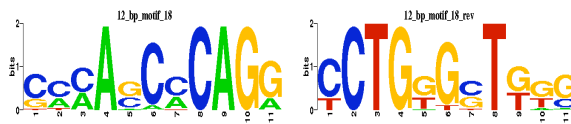

*forward*

*reverse compliment*

| Name               | E value    | Alignment                     |
|--------------------|------------|-------------------------------|
| CAC-binding_M00720 | 1.6676e-07 | CMMASCCCAGG<br>CCCASCCY---    |
| CP2_M00072         | 1.3826e-06 | CMMASCCCAGG<br>CNCNAMCCAG-    |
| SITEIIATCYTC       | 3.3757e-05 | CCTGGGSTKKG<br>--TGGGCY---    |
| SREBP-1_M00749     | 1.5976e-04 | CCTGGGSTKKG<br>--TGGSGT---    |
| Sp3_M00665         | 1.8043e-04 | CMMASCCCAGG--<br>CCCYSCCAAGKS |

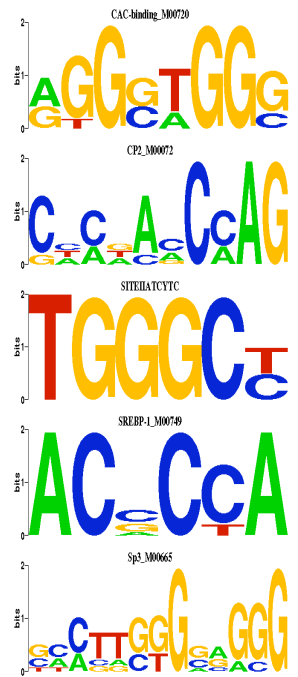

**12\_bp\_motif\_pair\_11**

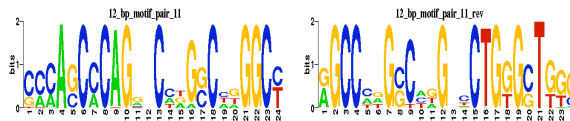

*forward*                      *reverse compliment*

*Name*                      *E value*                      *Alignment*

|                    |            |                                                        |
|--------------------|------------|--------------------------------------------------------|
| CAC-binding_M00720 | 2.8114e-06 | CCCAGCCCAGNNCNGSCNNGGCY<br>CCCASCCY-----               |
| p53_M00034         | 3.8528e-06 | RGCCNNGSCNNGNCTGGGCTGGG<br>RGACATGCCCGGGCATGTC-----    |
| TP53               | 1.2026e-04 | CCCAGCCCAGNNCNGSCNNGGCY--<br>-----ACATGCCCGGGCATGTCCNN |
| SITEIIATCYTC       | 1.4423e-04 | CCCAGCCCAGNNCNGSCNNGGCY<br>---RGCCA-----               |
| CP2_M00072         | 2.7922e-04 | RGCCNNGSCNNGNCTGGGCTGGG<br>-----CTGGKTNGNG             |

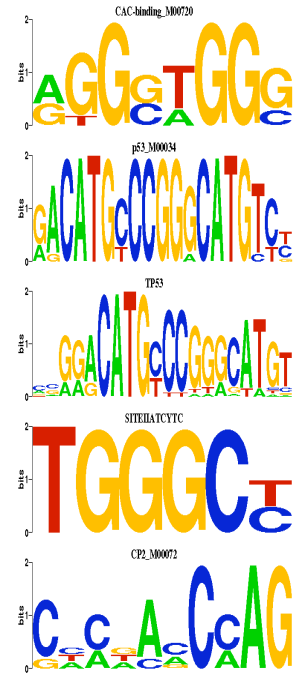

**12\_bp\_motif\_7**

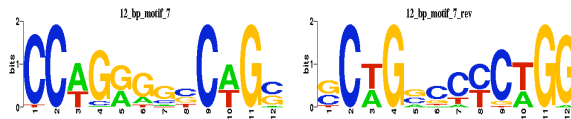

*forward*                      *reverse compliment*

*Name*                      *E value*                      *Alignment*

|                 |            |                                       |
|-----------------|------------|---------------------------------------|
| AMMORESVDCRNIA1 | 2.1744e-06 | CCAGRGGNCWGS<br>CCCGGGGCC---          |
| Egr_M00807      | 3.4514e-05 | CCAGRGGNCWGS<br>--TGGGSGCRRN          |
| shn             | 1.5434e-04 | CCAGRGGNCWGS-----<br>--WGGGKGSASCCAMT |
| RNFG2OS         | 1.8675e-04 | CCAGRGGNCWGS---<br>CCAGGGGCACACTGG    |

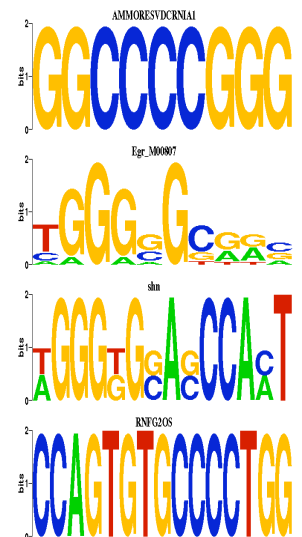

E12\_M00693

2.3359e-04

SCWGNCCYCTGG  
--NNNCACCTGY

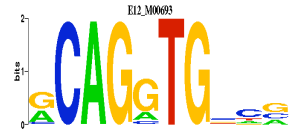

**12\_bp\_motif\_pair\_3**

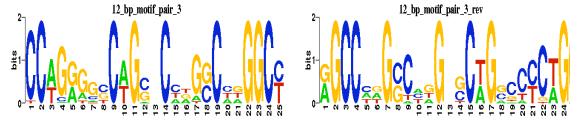

*forward*

*reverse compliment*

| Name            | E value    | Alignment                                             | Motif |
|-----------------|------------|-------------------------------------------------------|-------|
| AMMORESVDCRNIA1 | 6.4637e-05 | CCAGRGGNCWGSNCNNGSCNNGGCY<br>CCCCGGGCC-----           |       |
| p53_M00034      | 2.2341e-04 | RGCCNNGSCNNGNSCWGNCCYCTGG<br>RGACATGCCCGGGCATGTC----- |       |
| shn             | 8.4280e-04 | CCAGRGGNCWGSNCNNGSCNNGGCY<br>--WGGGKSASCCAMT-----     |       |
| Egr_M00807      | 8.5401e-04 | CCAGRGGNCWGSNCNNGSCNNGGCY<br>--TGGGSGCRRN-----        |       |
| SITEIIATCYTC    | 1.0490e-03 | RGCCNNGSCNNGNSCWGNCCYCTGG<br>RGCCCA-----              |       |

**12\_bp\_motif\_pair\_5**

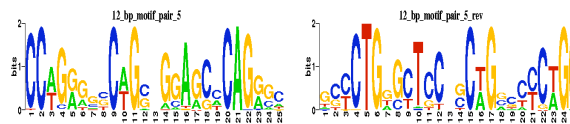

*forward*

*reverse compliment*

| Name            | E value    | Alignment                                         | Motif |
|-----------------|------------|---------------------------------------------------|-------|
| AtMYB-84_M00970 | 4.6032e-05 | NCYCTGNGCTCCNSCWGNCCYCWGG<br>-----SCACCTACCNCC--- |       |

Stamp Results

09/05/08

|                 |            |                                                   |
|-----------------|------------|---------------------------------------------------|
| AtMYB84         | 1.7757e-04 | NCYCTGNGCTCCNSCWGNNCYCWGG<br>-----SCACCTACCNCCN-- |
| AMMORESVDCRNIA1 | 1.8225e-04 | CCWGRGNNCWGSNNGAGCNCAGRGN<br>CCCGGGGCC-----       |
| SITEIIATCYTC    | 1.9894e-04 | CCWGRGNNCWGSNNGAGCNCAGRGN<br>-----RGCCCA-----     |
| ACIIPVPAL2      | 4.0754e-04 | CCWGRGNNCWGSNNGAGCNCAGRGN<br>---GGGGTTGGTG-----   |

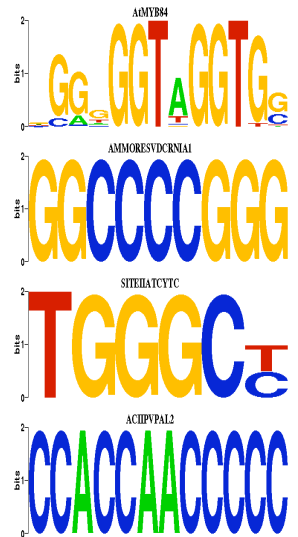

12\_bp\_motif\_pair\_6

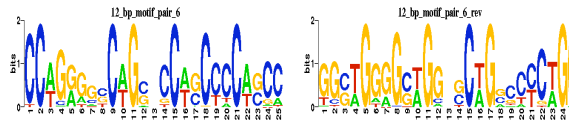

*forward*

*reverse compliment*

| Name               | E value    | Alignment                                          | Motif |
|--------------------|------------|----------------------------------------------------|-------|
| UF1H3BETA_M01068   | 5.0526e-08 | CCAGRGGNCWGSNCCWSCCCASCC<br>-----GCCCTCCCCRC--     |       |
| CAC-binding_M00720 | 9.9149e-06 | CCAGRGGNCWGSNCCWSCCCASCC-<br>-----CCASCY           |       |
| GBF_M00633         | 1.5634e-05 | GGSTGGGGSWGGNSCWGNCCYCTGG<br>---TNGGGGTN-----      |       |
| Alfin1_M00479      | 4.1222e-05 | CCAGRGGNCWGSNCCWSCCCASCC<br>-----MNNCCCCACNYNYN--- |       |
| AMMORESVDCRNIA1    | 6.4637e-05 | CCAGRGGNCWGSNCCWSCCCASCC<br>CCCGGGGCC-----         |       |

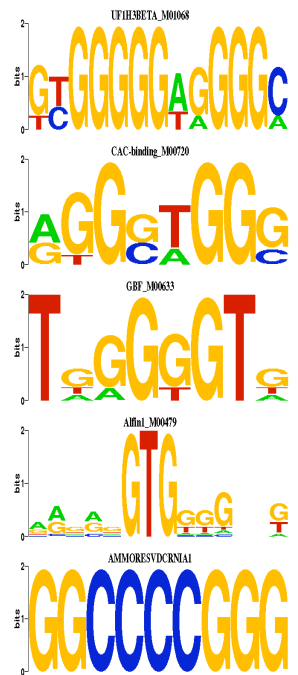

**12\_bp\_motif\_pair\_10**

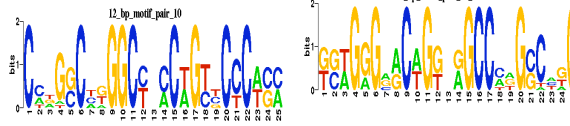

*forward*

*reverse compliment*

| <i>Name</i>     | <i>E value</i> | <i>Alignment</i>                                            |
|-----------------|----------------|-------------------------------------------------------------|
| ABF1_M00399     | 7.8154e-07     | -KSWG GGNACWGGNRGCCMNGSCNKG<br>WNNNNGGGACACGTGGC NNGANN---- |
| SITEIIATCYTC    | 3.8402e-04     | KSWG GGNACWGGNRGCCMNGSCNKG<br>-----RGCCA-----               |
| AtMYB-84_M00970 | 5.7979e-04     | KSWG GGNACWGGNRGCCMNGSCNKG<br>---GGNGGTAGGTGS-----          |
| ABRETAEM        | 7.2966e-04     | CMNGSCNKGGCYNCCWGTNCCCWSM<br>-----GCCACGTGTCC-----          |
| ACIIPVPAL2      | 1.2457e-03     | CMNGSCNKGGCYNCCWGTNCCCWSM<br>-----CCACCAACCC--              |

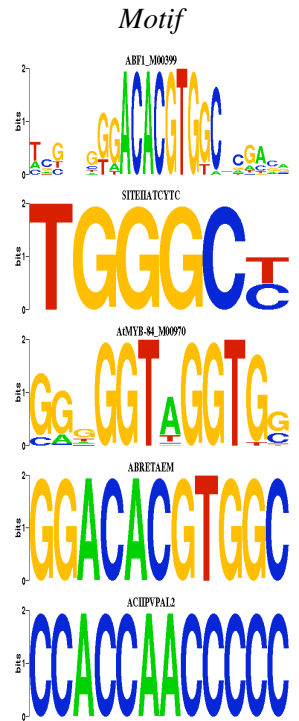

**12\_bp\_motif\_pair\_14**

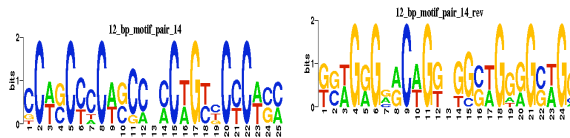

*forward*

*reverse compliment*

| <i>Name</i>     | <i>E value</i> | <i>Alignment</i>                                        |
|-----------------|----------------|---------------------------------------------------------|
| ABF1_M00399     | 3.0672e-06     | CCWSCCCCWSSCNCCWGYNCCCWSM-<br>---NNTCNNGCCACGTGTCCNNNNW |
| AtMYB-84_M00970 | 1.0984e-05     | CCWSCCCCWSSCNCCWGYNCCCWSM<br>-----SCACCTACCNC--         |

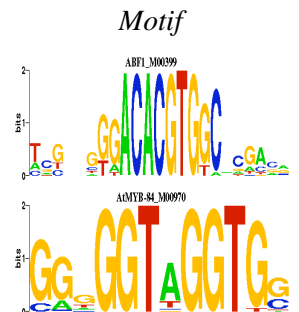

|                    |            |                                                     |
|--------------------|------------|-----------------------------------------------------|
| MAF_M00648         | 1.7847e-05 | CCWSCCCCWSCCNCCWGYNCCCWSM<br>-----NSNMMACTTCCYYCN-- |
| CAC-binding_M00720 | 2.6707e-05 | CCWSCCCCWSCCNCCWGYNCCCWSM<br>-----CCCASCCY-----     |
| UF1H3BETA_M01068   | 2.9403e-05 | CCWSCCCCWSCCNCCWGYNCCCWSM<br>---GCCCTCCCCRC-----    |

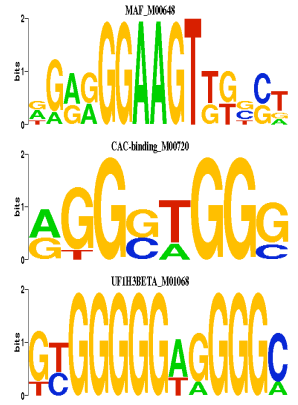

8\_bp\_motif\_4

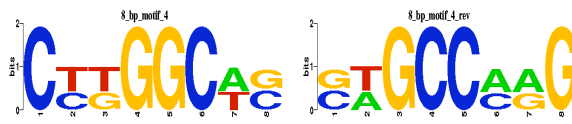

*forward*

*reverse compliment*

| Name            | E value    | Alignment                                      | Motif |
|-----------------|------------|------------------------------------------------|-------|
| RIM101          | 3.2352e-08 | SWGCCMRG<br>-TGCCAAG                           |       |
| YY1_M00069      | 5.1233e-06 | -----CYKGGCWS--<br>NNCNGCCATCTGNNTSNW          |       |
| myogenin_M00056 | 4.2945e-05 | -CYKGGCWS-----<br>NNYTGGCNSNGTGCCAAANNNNACAGST |       |
| ey              | 8.5762e-05 | -----CYKGGCWS--<br>CCCACACTNGGCANAA            |       |
| SEBFCONSSTPR10A | 2.4416e-04 | CYKGGCWS<br>-YTGTCWC                           |       |

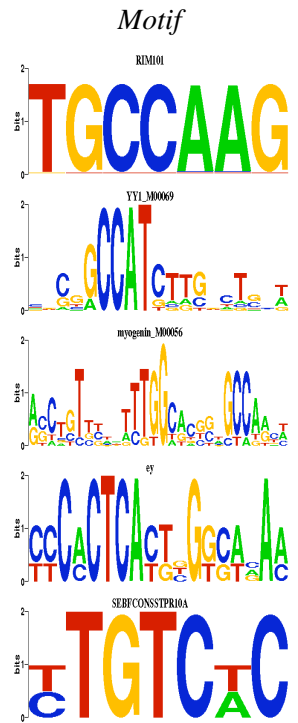

8\_bp\_motif\_pair\_9

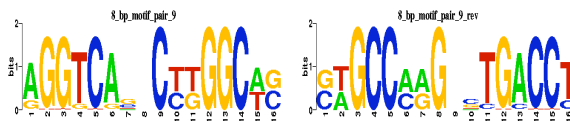

|              | <i>forward</i> | <i>reverse compliment</i>                         |                                                                                     |
|--------------|----------------|---------------------------------------------------|-------------------------------------------------------------------------------------|
| <i>Name</i>  | <i>E value</i> | <i>Alignment</i>                                  | <i>Motif</i>                                                                        |
| QELEMENTZM13 | 3.3174e-07     | SWGCCMRGNNTGACCT<br>-----TGACCT                   |  |
| RIM101       | 4.2516e-06     | SWGCCMRGNNTGACCT<br>-TGCCAAG-----                 |  |
| WBOXNTCHN48  | 1.9787e-05     | AGGTCANNCYKGGCWS<br>-RGTCAG-----                  |  |
| YML081W      | 2.7564e-05     | AGGTCANNCYKGGCWS<br>--TTCAGACTGG----              |  |
| ABF1_M00399  | 1.9066e-04     | ----SWGCCMRGNNTGACCT----<br>NNTCNGCCACGTGTCCNNNNW |  |

**12\_bp\_motif\_8**

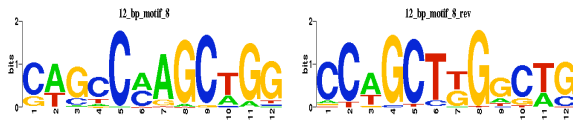

|             | <i>forward</i> | <i>reverse compliment</i>                  |                                                                                       |
|-------------|----------------|--------------------------------------------|---------------------------------------------------------------------------------------|
| <i>Name</i> | <i>E value</i> | <i>Alignment</i>                           | <i>Motif</i>                                                                          |
| YY1_M00069  | 1.4505e-10     | --CAGCCMAGCTGG-----<br>WNSANNCAAGATGGCNGNN |  |
| HEB_M00698  | 1.2534e-07     | CCAGCTKGGCTG<br>CCWGCTG-----               |  |
| RBENTGA3    | 9.6838e-06     | -CCAGCTKGGCTG<br>TCCAAC TTGGA--            |  |
| RIM101      | 2.0594e-05     | CAGCCMAGCTGG<br>-TGCCAAG-----              |  |



SITEIOSPCNA 2.3403e-05

CCAGCTKGGCTG  
CCACCTGG----

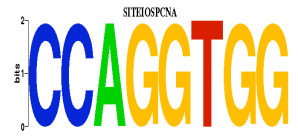

12\_bp\_motif\_pair\_4

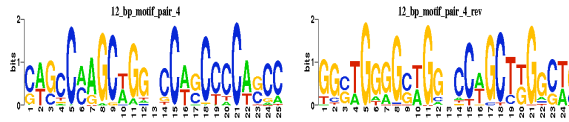

*forward*                      *reverse compliment*

| Name               | E value    | Alignment                                              | Motif |
|--------------------|------------|--------------------------------------------------------|-------|
| HEB_M00698         | 1.6500e-06 | CAGCCMAGCWGGNCCWSCCCASCC<br>-----CAGCWGG-----          |       |
| CAC-binding_M00720 | 8.4158e-06 | CAGCCMAGCWGGNCCWSCCCASCC-<br>-----CCCASCCY             |       |
| YY1_M00069         | 8.5183e-06 | --CAGCCMAGCWGGNCCWSCCCASCC<br>WNSANNCAAGATGGCNGNN----- |       |
| GBF_M00633         | 9.5902e-06 | GGSTGGGGSWGGNCCWGCTKGGCTG<br>---TNGGGGTN-----          |       |
| UF1H3BETA_M01068   | 2.2835e-05 | CAGCCMAGCWGGNCCWSCCCASCC<br>-----GCCCTCCCCRC--         |       |

8\_bp\_motif\_pair\_2

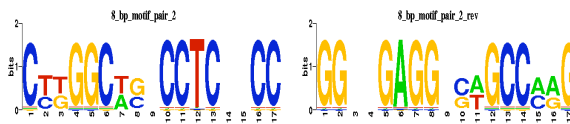

*forward*                      *reverse compliment*

| Name   | E value    | Alignment                      | Motif |
|--------|------------|--------------------------------|-------|
| RIM101 | 2.3339e-05 | CYKGGCWSNCTCNCC<br>CTTGCA----- |       |

Stamp Results

09/05/08

|             |            |                                                  |
|-------------|------------|--------------------------------------------------|
| shn         | 1.0992e-03 | CYKGGCWSNCCTCNNCC<br>AKTGGSTSCMCCCW---           |
| GAL4_M00049 | 1.1061e-03 | ----CYKGGCWSNCCTCNNCC-<br>NNCGGNNNACWNTNSTCCGAAS |
| YejW        | 1.6221e-03 | --GGNNGAGGNSWGCCMRG-<br>CNGTGGGAGCGCTCCCANNA     |
| ETF_M00695  | 2.0792e-03 | CYKGGCWSNCCTCNNCC<br>-----CCGCCN--               |

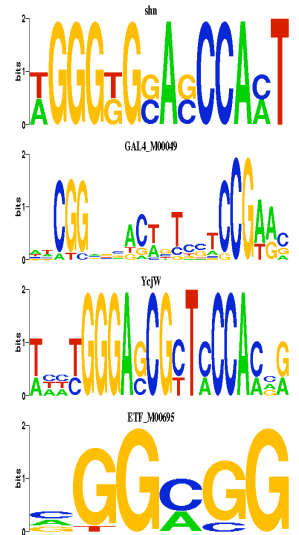

8\_bp\_motif\_pair\_11

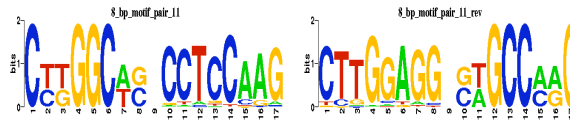

*forward*

*reverse compliment*

| Name            | E value    | Alignment                                               |
|-----------------|------------|---------------------------------------------------------|
| myogenin_M00056 | 4.0010e-06 | -CYKGGCWSNCCTCCAAG-----<br>NNYTGGCNSNGTGCCAAANNNNACAGST |
| RIM101          | 5.3733e-06 | CTTGGAGGNSWGCCMRG<br>-----TGCCAAG                       |
| SBOXATRBCS      | 7.4658e-06 | CTTGGAGGNSWGCCMRG<br>--TGGAGGTG-----                    |
| GAL4_M00049     | 9.0459e-05 | -CTTGGAGGNSWGCCMRG----<br>STTCGGASNANWGTNNNCCGNN        |
| YejW_EC         | 9.9494e-05 | --CTTGGAGGNSWGCCMRG-<br>WMNTGGKAGCGSTCCCAIRA            |

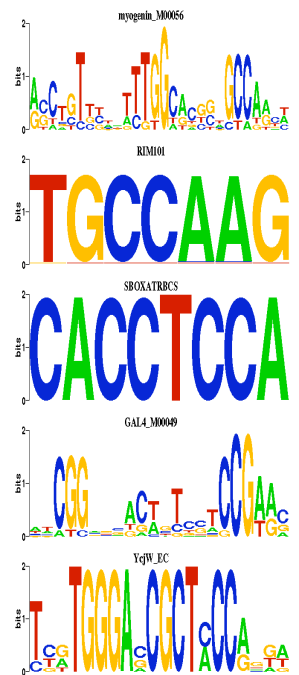

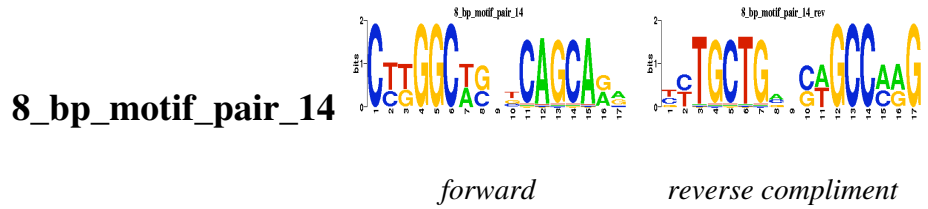

| <i>Name</i>     | <i>E value</i> | <i>Alignment</i>                                          | <i>Motif</i> |
|-----------------|----------------|-----------------------------------------------------------|--------------|
| ABF1_M00401     | 2.3310e-06     | -----CTKGGCWGNNCAGCARR-----<br>GYCNCNNKGCCACGTCANCNANNMGA |              |
| RIM101          | 1.3440e-05     | CTKGGCWGNNCAGCARR<br>CTTGGCA-----                         |              |
| LMAF_M01139     | 2.2791e-05     | CTKGGCWGNNCAGCARR<br>-----STCAGCAG-                       |              |
| SMb20667        | 2.9473e-05     | -CTKGGCWGNNCAGCARR--<br>GGTTGGCAGCGCTGCCAAAA              |              |
| myogenin_M00056 | 1.3140e-04     | -CTKGGCWGNNCAGCARR-----<br>NNYTGGCNSNGTGCCAAANNNACAGST    |              |

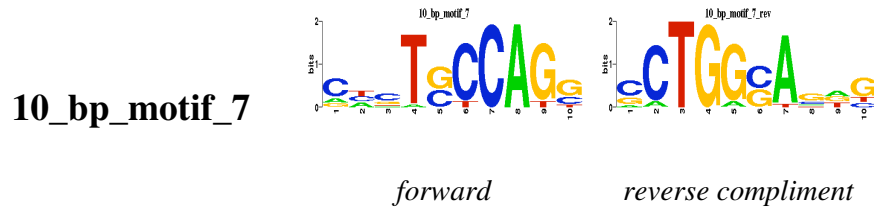

| <i>Name</i> | <i>E value</i> | <i>Alignment</i>         | <i>Motif</i> |
|-------------|----------------|--------------------------|--------------|
| MAZ_M00649  | 8.8708e-06     | CCTGGSANNG<br>---GGGAGGG |              |
| TGIF_M00418 | 1.1810e-05     | CNNTSCCAGG<br>WNTTGACAGC |              |

|              |            |                          |
|--------------|------------|--------------------------|
| Lyf-1_M00141 | 1.7915e-05 | CNNTSCCAGG<br>-YCTCCCAA- |
| BOXCPSAS1_3  | 6.0222e-05 | CCTGGSANNG<br>-GTGGGAG-- |
| RIM101       | 2.3195e-04 | CCTGGSANNG<br>CTTGCA---  |

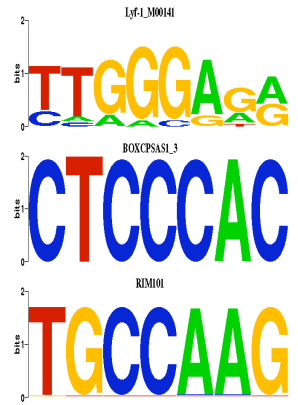

10\_bp\_motif\_pair\_5

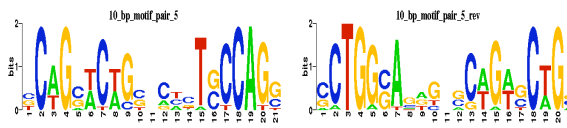

*forward*                      *reverse compliment*

| Name         | E value    | Alignment                                              |
|--------------|------------|--------------------------------------------------------|
| FACB_M00389  | 4.1058e-05 | SCTGGSANNGNSCWGWSCTGN----<br>ANNNGCNRNGMNAAAMNCTGCNNNN |
| MAZ_M00649   | 8.7642e-05 | NCAGSWCWGSNCNNTSCCAGS<br>-----CCCTCCC---               |
| Lyf-1_M00141 | 2.2747e-04 | NCAGSWCWGSNCNNTSCCAGS<br>-----YCTCCCAA-                |
| Eve_M00629   | 3.0981e-04 | SCTGGSANNGNSCWGWSCTGN<br>-----GCNGSSWN-                |
| MTF-1_M00650 | 4.6558e-04 | SCTGGSANNGNSCWGWSCTGN<br>--GGCCGNGTGCAN-----           |

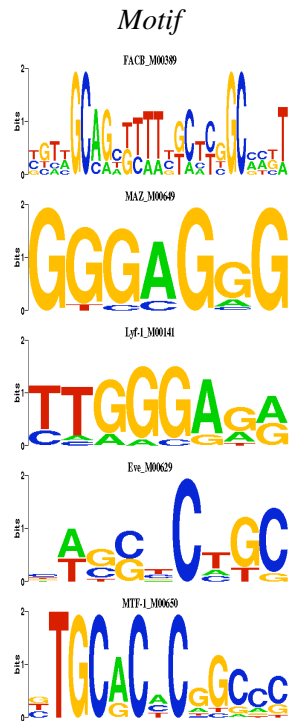

10\_bp\_motif\_19

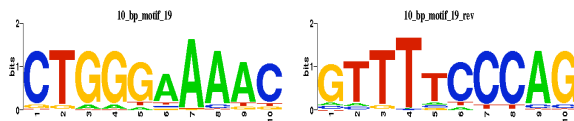

*forward* *reverse compliment*

*Name* *E value* *Alignment* *Motif*

|              |            |                               |                                                                                     |
|--------------|------------|-------------------------------|-------------------------------------------------------------------------------------|
| Ik-3_M00088  | 4.0042e-09 | -CTGGGAAAAC-<br>NYNGGGAAATACC | 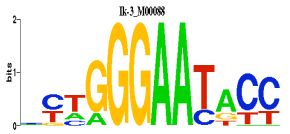 |
| dl           | 3.0991e-07 | CTGGGAAAAC--<br>--NGGAAAAAYCC |  |
| E2Ff_oneSite | 5.8588e-07 | GTTTTCCCAG-<br>-TTTTCCCGCG    |  |
| dl_M00120    | 6.3839e-07 | --GTTTTCCCAG<br>NGNTTTCYC--   |  |
| dl_M00043    | 5.3707e-06 | CTGGGAAAAC-<br>-NGGAAAACC     |  |

**12\_bp\_motif\_17**

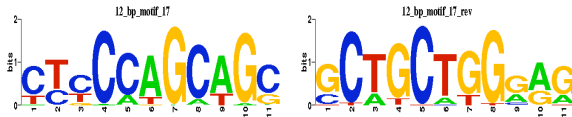

*forward* *reverse compliment*

*Name* *E value* *Alignment* *Motif*

|                  |            |                                                          |                                                                                       |
|------------------|------------|----------------------------------------------------------|---------------------------------------------------------------------------------------|
| ANAERO2CONSENSUS | 1.8588e-07 | GCTGCTGGGAG<br>GCTGCT-----                               |  |
| HEB_M00698       | 7.9932e-06 | GCTGCTGGGAG<br>-CAGCWGG---                               |  |
| TAL1_M00993      | 1.8067e-05 | -GCTGCTGGGAG<br>RNCAGNTGG---                             |  |
| PE3ASPHYA3       | 1.8685e-05 | -----GCTGCTGGGAG-----<br>ACCGGCGCGGATGGGAGAGCCATGGGAGCTG |  |

BOXCPSAS1\_3

2.2854e-05

GCTGCTGGGAG  
 ----GTGGGAG

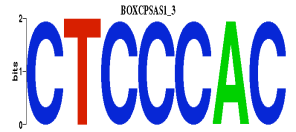

10\_bp\_motif\_13

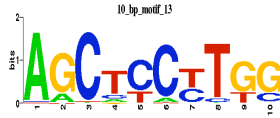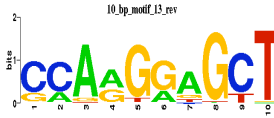

*forward*

*reverse compliment*

| Name             | E value    | Alignment                                  |
|------------------|------------|--------------------------------------------|
| Olf-1_M00261     | 4.6381e-06 | ---AGCTCCYTGG-----<br>NCMNNYTCNCRGGGANTNGN |
| VSF1PVGRP18      | 1.0736e-05 | CCARGGAGCT<br>CAACGGAGC-                   |
| LUN-1_M00480     | 1.6897e-05 | ---CCARGGAGCT---<br>TCCCAAAGTAGCTGGG       |
| REST             | 2.1974e-05 | --AGCTCCYTGG-----<br>TCAGCACCWNGGACAGCNC   |
| alpha-CP1_M00687 | 5.8885e-05 | AGCTCCYTGG--<br>--CTCATTGGCT               |

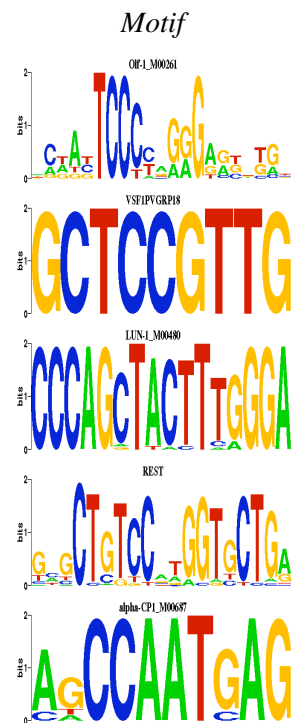

10\_bp\_motif\_pair\_12

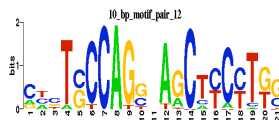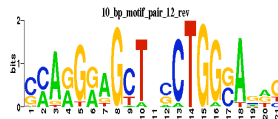

*forward*

*reverse compliment*

| Name | E value | Alignment | Motif |
|------|---------|-----------|-------|
|------|---------|-----------|-------|

|                |            |                                                |
|----------------|------------|------------------------------------------------|
| MAZ_M00649     | 5.4899e-05 | CNNTSCCAGSNAGCTYCYTKG<br>CCCTCCC-----          |
| IDE1HVIDS2     | 5.6658e-05 | CMARGRAGCTNSCTGGSANNG<br>GCAAGAAGCATGCTTGAT--- |
| SFL1           | 1.0766e-04 | CNNTSCCAGSNAGCTYCYTKG<br>-----GAAGCTTC----     |
| Lyf-1_M00141   | 1.0823e-04 | CNNTSCCAGSNAGCTYCYTKG<br>-YCTCCCAA-----        |
| c-Ets-1_M00743 | 1.3911e-04 | CNNTSCCAGSNAGCTYCYTKG<br>-----GCTTCK--         |

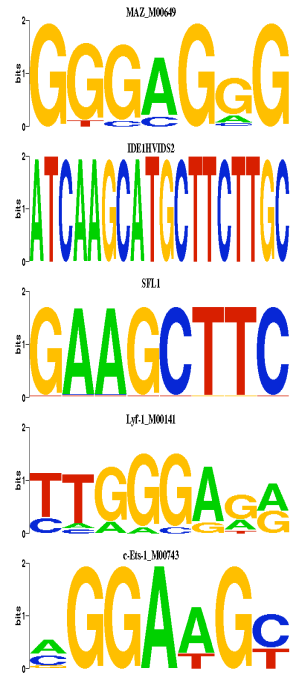

8\_bp\_motif\_5

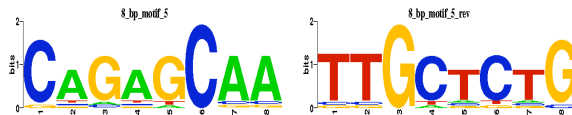

*forward*

*reverse compliment*

| Name         | E value    | Alignment                |
|--------------|------------|--------------------------|
| XPF-1_M00684 | 6.2916e-06 | -TTGCTCTG<br>GKTSNYCNG   |
| SPIB         | 5.3064e-05 | TTGCTCTG<br>TTCKST-      |
| dTCF_M00362  | 7.7097e-05 | CAGAGCAA--<br>AAGATCAAAG |
| GAGA_M00723  | 9.5163e-05 | TTGCTCTG--<br>TYNCKCTCWS |
| Eve_M00629   | 1.6344e-04 | -CAGAGCAA<br>GCNGNSSWN   |

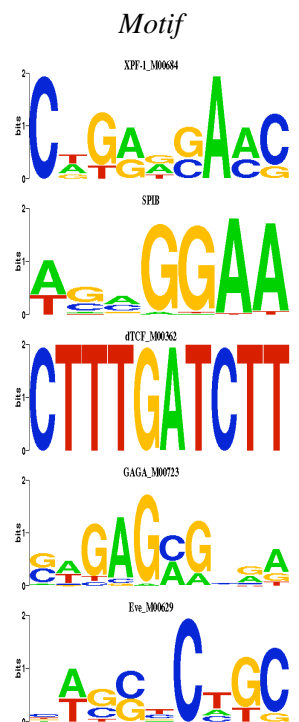

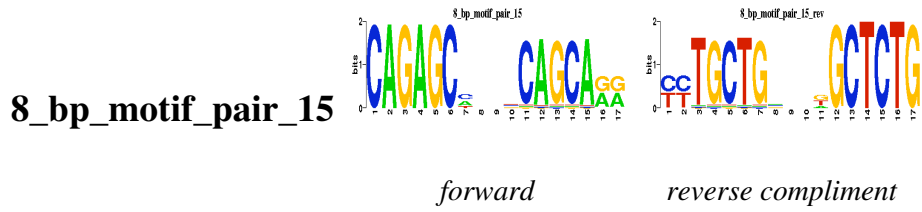

| Name                  | E value    | Alignment                                    | Motif |
|-----------------------|------------|----------------------------------------------|-------|
| HEB_M00698            | 1.6251e-04 | CAGAGCNNNNCAGCARR<br>-----CAGCWGG            |       |
| LMAF_M01139           | 2.6943e-04 | YYTGCTGNNNNGCTCTG<br>-CTGCTGAS-----          |       |
| fadR                  | 4.0132e-04 | --CAGAGCNNNNCAGCARR<br>WANWNRTCNGACCAGYT--   |       |
| CP2-LBP-1c-LSF_M00947 | 5.5934e-04 | -CAGAGCNNNNCAGCARR<br>CNRGNNNNANCCAG----     |       |
| SMb20537              | 1.1700e-03 | --YYTGCTGNNNNGCTCTG-<br>TTCTTGCAAATTTGCATTGT |       |

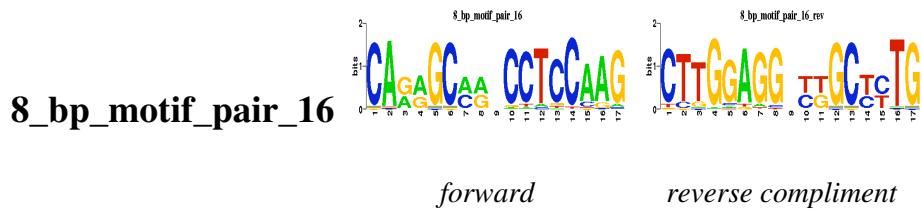

| Name       | E value    | Alignment                                   | Motif |
|------------|------------|---------------------------------------------|-------|
| SMb20537   | 6.1242e-05 | --CTTGAGGNYKGCYYTG-<br>TTCTTGCAAATTTGCATTGT |       |
| SBOXATRBCS | 2.3164e-04 | CTTGAGGNYKGCYYTG<br>--TGGAGGTG-----         |       |



|              |            |                                        |
|--------------|------------|----------------------------------------|
| PR2GCNT      | 8.0193e-04 | CTTGGAGGNYKGCYYTG-<br>-----GGCGGCTYTTA |
| E2F-1_M00430 | 1.0160e-03 | CTTGGAGGNYKGCYYTG<br>-TTSGCGG-----     |
| ERE          | 1.5300e-03 | CTTGGAGGNYKGCYYTG-<br>-----GGCGGCTCTTA |

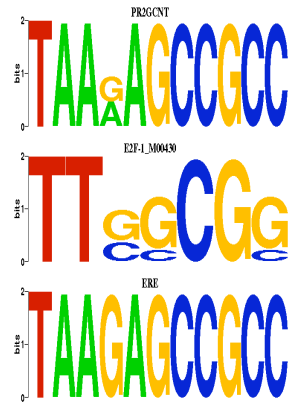

12\_bp\_motif\_5

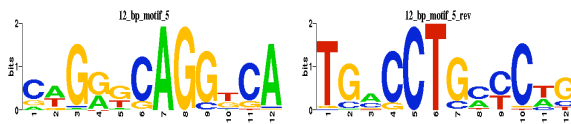

forward

reverse compliment

| Name           | E value    | Alignment                            |
|----------------|------------|--------------------------------------|
| QELEMENTZMZM13 | 4.1080e-07 | TGMCCTGMCCWG<br>TGACCT-----          |
| E2A_M00973     | 4.7104e-06 | TGMCCTGMCCWG<br>--ANCTGNY---         |
| L1DCPAL1       | 8.8197e-05 | CWGGKCAGGKCA--<br>--GGGTAGGTGAAT     |
| XBP-1_M00251   | 1.7425e-04 | -CWGGKCAGGKCA---<br>NWNNNMCACGTCANCN |
| bZIP911_M00358 | 1.7861e-04 | -TGMCCCTGMCCWG<br>RTGACGTGGCC--      |

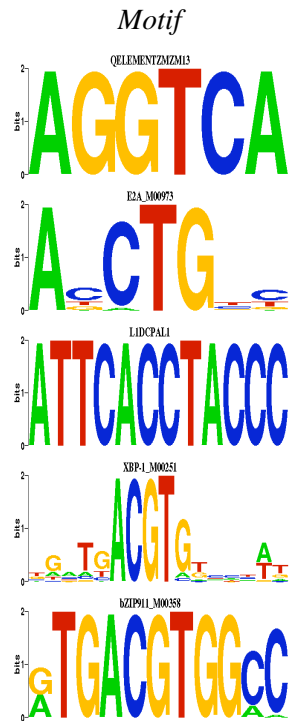

12\_bp\_motif\_pair\_17

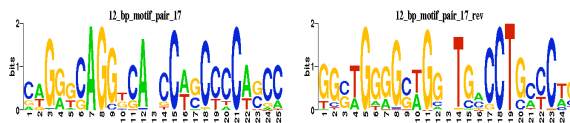

|                            | <i>forward</i> | <i>reverse compliment</i>                                |                                                                                     |
|----------------------------|----------------|----------------------------------------------------------|-------------------------------------------------------------------------------------|
| <i>Name</i>                | <i>E value</i> | <i>Alignment</i>                                         | <i>Motif</i>                                                                        |
| SMAD4_M00733               | 1.4426e-06     | GGSTGGGGSWGGNTGMCCTGCCCWG<br>-----RGNTGKCTGNMYSN-----    |  |
| PPARgamma-RXRalpha,_M00515 | 2.1745e-06     | CWGGGCAGGKCANCCWSCCCASCSCC<br>--AANTAGGTCACNGTGACCTAST-- |  |
| CAC-binding_M00720         | 8.4158e-06     | CWGGGCAGGKCANCCWSCCCASCSCC-<br>-----CCASCSCCY            |  |
| GBF_M00633                 | 9.5902e-06     | GGSTGGGGSWGGNTGMCCTGCCCWG<br>---TNGGGGTN-----            |  |
| PPARG                      | 9.9465e-06     | CWGGGCAGGKCANCCWSCCCASCSCC<br>---ANTRGGTCACNNTGACCTAN--- |  |

**8\_bp\_motif\_pair\_5**

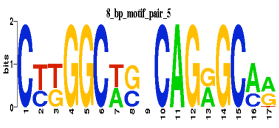

*forward*



*reverse compliment*

| <i>Name</i>    | <i>E value</i> | <i>Alignment</i>                                                                | <i>Motif</i>                                                                          |
|----------------|----------------|---------------------------------------------------------------------------------|---------------------------------------------------------------------------------------|
| rhaS           | 3.3835e-07     | -----CYKGGCWSNCAGRGCAR-----<br>MCYTTCKCSTKWKYSMSMSGWRRWYGRKYAYTGCAAYCASGGMAWKAW | 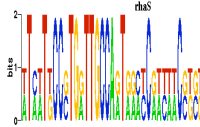 |
| RIM101         | 1.9865e-05     | CYKGGCWSNCAGRGCAR<br>CTTGCA-----                                                |  |
| PSREGIONZMZM13 | 3.6899e-05     | YTGCYCTGNSWGCCMRG-----<br>TTTGTCTGGCTGCCCGTAGAAATAGTGGCCGA                      |  |
| RFX1           | 1.2147e-04     | -YTGCYCTGNSWGCCMRG<br>GTINCCATGRCAAC----                                        |  |

Stamp Results

09/05/08

TGIF\_M00418

1.9063e-04

YTGCYCTGNSWGCCMRG  
 ---WNTGACAGC----

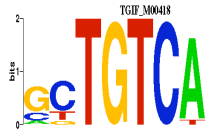

8\_bp\_motif\_pair\_13

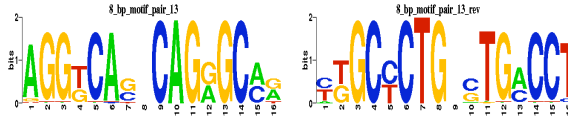

*forward*

*reverse compliment*

| Name         | E value    | Alignment                                                 | Motif |
|--------------|------------|-----------------------------------------------------------|-------|
| QELEMENTZM3  | 1.0747e-06 | AGGTCASNCAGRGC MR<br>AGGTC A-----                         |       |
| PSREGIONZM3  | 5.5893e-05 | YKGCYCTGNSTGACCT-----<br>TTTGTCTGGCTGCCCGTAGAAATAGTGGCCGA |       |
| WBOXNTCHN48  | 1.1324e-04 | YKGCYCTGNSTGACCT<br>-----CTGACY-                          |       |
| ESR1         | 1.2763e-04 | YKGCYCTGNSTGACCT--<br>NNGGYCANNGTGACCTNN                  |       |
| MYB1_twoSite | 1.6552e-04 | YKGCYCTGNSTGACCT<br>----YCTAACTGM---                      |       |

12\_bp\_motif\_6

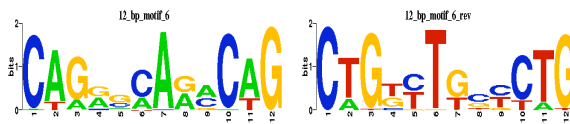

*forward*

*reverse compliment*

| Name    | E value    | Alignment                                   | Motif |
|---------|------------|---------------------------------------------|-------|
| MarR_ec | 1.5630e-06 | -CTGKYTGNYCTG-----<br>AATGGTTGCCCGGCAAGTAAT |       |

|                |            |                                                            |
|----------------|------------|------------------------------------------------------------|
| PSREGIONZM3    | 6.8940e-06 | -----CAGRNCARMCAG-----<br>TCGGCCACTATTTCTACGGGCAGCCAGACAAA |
| SMAD4_M00733   | 2.2637e-05 | --CTGKYTGNYCTG<br>RGNTGKCTGNMYSN                           |
| Poly_M00317    | 2.7338e-05 | --CTGKYTGNYCTG--<br>NNSTGKTNYMWTN                          |
| Xvent-1_M00445 | 6.7518e-05 | CAGRNCARMCAG--<br>--RSRCAAATAGNN                           |

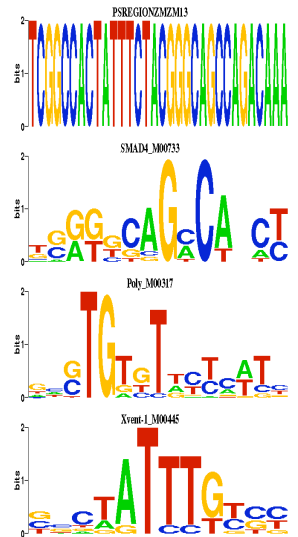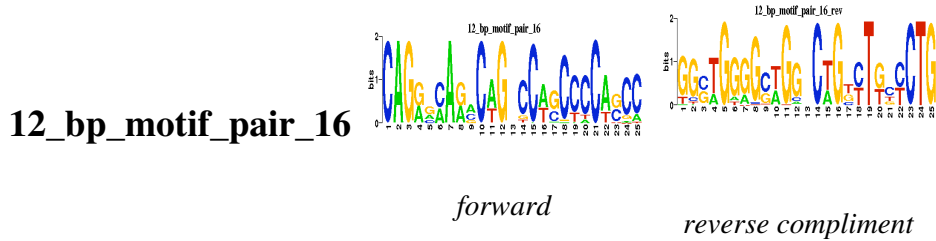

| <i>Name</i>        | <i>E value</i> | <i>Alignment</i>                                             | <i>Motif</i> |
|--------------------|----------------|--------------------------------------------------------------|--------------|
| CAC-binding_M00720 | 6.8703e-06     | CAGRNCARMCAGNCCWCCCCASCC--<br>-----CCASCCY                   |              |
| GBF_M00633         | 1.0385e-05     | GGSTGGGGCWGGNCTGKYTGNYCTG<br>---TNGGGGTN-----                |              |
| Alfin1_M00479      | 4.3747e-05     | ---GGSTGGGGCWGGNCTGKYTGNYCTG<br>NRNRNGTGGGGNNK-----          |              |
| RREB1              | 1.3217e-04     | -GGSTGGGGCWGGNCTGKYTGNYCTG<br>NGKKKGKGGTGKTTTGGG-----        |              |
| Bel-1_M00312       | 3.4916e-04     | ---GGSTGGGGCWGGNCTGKYTGNYCTG<br>ANCTGCTGAYRCWGMGNKNACTNYCNM- |              |

12\_bp\_motif\_3

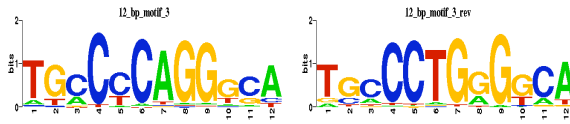

forward

reverse compliment

| Name            | E value    | Alignment                               |
|-----------------|------------|-----------------------------------------|
| TFAP2A          | 2.3702e-06 | TGCCCCAGGGCA<br>--SCNNNNGGC--           |
| EBF_M00977      | 6.5711e-06 | TGCCCCAGGGCA<br>--NCYCWRGGGA            |
| AMMORESVDCRNIA1 | 1.6370e-05 | TGCCCCAGGGCA<br>---CCCGGGGCC            |
| RNFG2OS         | 3.9118e-05 | TGCCCTGGGGCA-----<br>---CCAGGGGCACACTGG |
| MNF1ZMPPC1      | 6.8460e-05 | -TGCCCTGGGGCA<br>GTGCCCTT-----          |

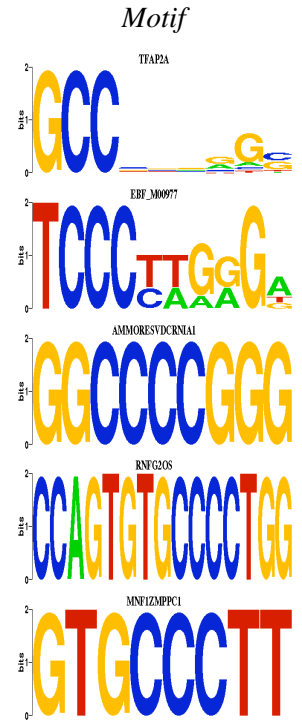

12\_bp\_motif\_pair\_18

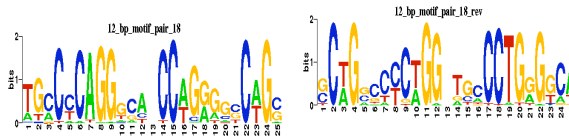

forward

reverse compliment

| Name            | E value    | Alignment                                            |
|-----------------|------------|------------------------------------------------------|
| AMMORESVDCRNIA1 | 6.4637e-05 | TGCCYCAGGGCANCCAGRGGNCWGS<br>-----CCCGGGGCC---       |
| RNFG2OS         | 7.4941e-05 | TGCCYCAGGGCANCCAGRGGNCWGS<br>---CCAGGGGCACACTGG----- |

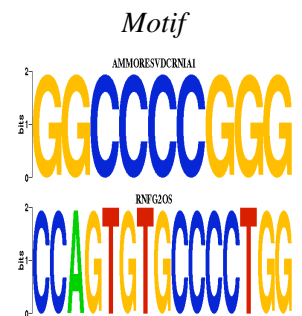

|            |            |                                                    |
|------------|------------|----------------------------------------------------|
| TFAP2A     | 9.7120e-05 | TGCCYCAGGGCANCCAGRGGNCWGS<br>--SCNNNGGC-----       |
| EBF_M00977 | 2.3643e-04 | TGCCYCAGGGCANCCAGRGGNCWGS<br>--NCYCWRGGGA-----     |
| GRAZMRAB17 | 3.2397e-04 | SCWGNCCYCTGGNTGCCCTGRGGCA<br>-----CACTGGCCGCC----- |

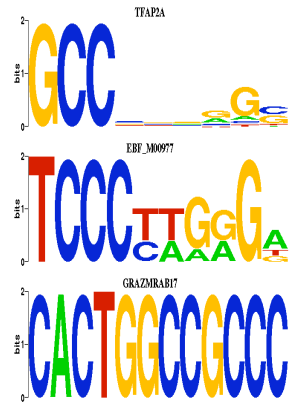

10\_bp\_motif\_17

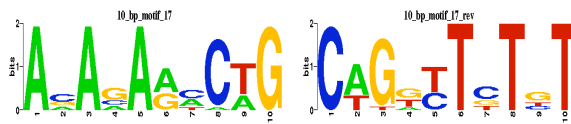

*forward*

*reverse compliment*

| Name         | E value    | Alignment                                                   | Motif |
|--------------|------------|-------------------------------------------------------------|-------|
| grh          | 6.7987e-07 | ANANARMCTG<br>RNNRAACCAG                                    |       |
| ICSBP_M00699 | 1.7047e-05 | CAGKYTNTNT-<br>CAGTTTCAYTT                                  |       |
| GARE2        | 1.1682e-04 | -CAGKYTNTNT-<br>CCRGANTYTGTAY                               |       |
| HSF_M00168   | 2.7491e-04 | --CAGKYTNTNT--<br>NGAANNTTCNNTTC                            |       |
| rpoE         | 3.7531e-04 | -----CAGKYTNTNT-----<br>NNNTTNNTCAGANTGTNTTTTATCCTNAAGTTCCG |       |

12\_bp\_motif\_10

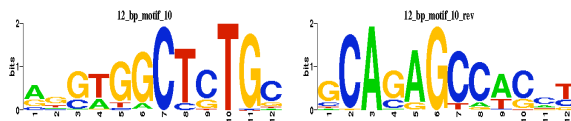

|              | <i>forward</i> | <i>reverse compliment</i>        |
|--------------|----------------|----------------------------------|
| <i>Name</i>  | <i>E value</i> | <i>Alignment</i>                 |
| SORLIP1      | 3.9455e-07     | GCAGAGCCACNY<br>----AGCCAC--     |
| ERE          | 4.4235e-06     | RNGTGGCTCTGC<br>-GGCGGCTCTTA     |
| EREGCC       | 4.4235e-06     | RNGTGGCTCTGC<br>-GGCGGCTCTTA     |
| SMAD4_M00733 | 1.4433e-05     | RNGTGGCTCTGC--<br>RGNTGKCTGNMYSN |
| CRZ1         | 1.9905e-05     | GCAGAGCCACNY<br>---CAGCCWC--     |

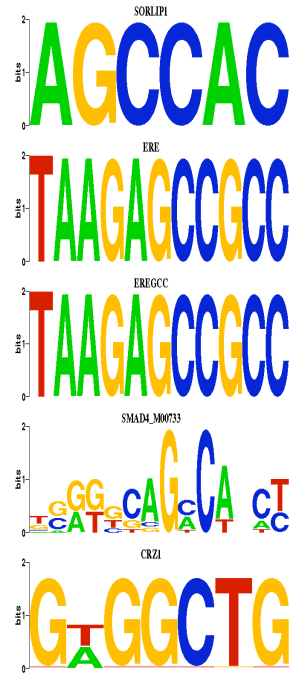

**12\_bp\_motif\_pair\_9**

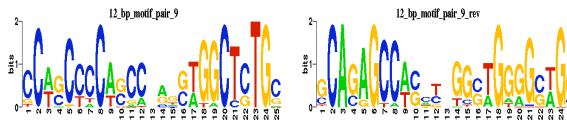

*forward*                      *reverse compliment*

| <i>Name</i>        | <i>E value</i> | <i>Alignment</i>                                 |
|--------------------|----------------|--------------------------------------------------|
| CAC-binding_M00720 | 8.4158e-06     | CCWSCCCCASCCNRNSTGGCTCTGC<br>-----CCCASCCY-----  |
| GBF_M00633         | 9.5902e-06     | GCAGAGCCASNYNGGSTGGGGSWGG<br>-----TNGGGGTN--     |
| SORLIP1            | 2.6696e-05     | CCWSCCCCASCCNRNSTGGCTCTGC<br>-----GTGGCT-----    |
| Alfin1_M00479      | 8.3938e-05     | CCWSCCCCASCCNRNSTGGCTCTGC<br>-MNNCCCCACNYYN----- |

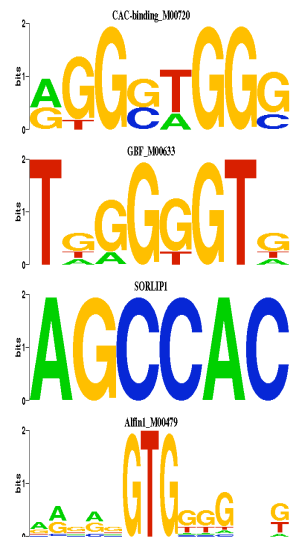

Stamp Results

09/05/08

Roaz

1.0029e-04

GCAGAGCCASNYNGGSTGGGGSWGG  
 -----GSMCCYARGGKNC-----

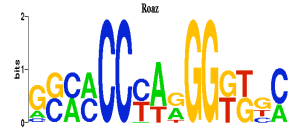

6\_bp\_motif\_11

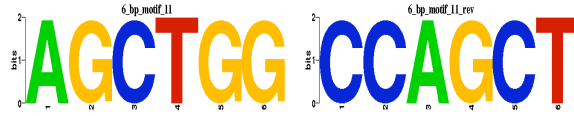

*forward*

*reverse compliment*

| Name         | E value    | Alignment                        | Motif |
|--------------|------------|----------------------------------|-------|
| HEB_M00698   | 7.5905e-09 | -AGCTGG<br>CAGCWGG               |       |
| AP-4_M00176  | 4.1156e-08 | -CCAGCT--<br>NNCAGCTGN           |       |
| LBP-1_M00644 | 1.1346e-07 | CCAGCT<br>SCAGCN                 |       |
| LUN-1_M00480 | 2.3287e-07 | -----AGCTGG-<br>TCCCAAAGTAGCTGGG |       |
| TAL1_M00993  | 7.7875e-07 | ---AGCTGG<br>RNCAGNTGG           |       |

6\_bp\_motif\_pair\_11

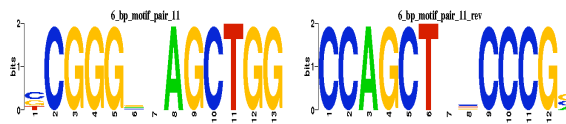

*forward*

*reverse compliment*

| Name            | E value    | Alignment                      | Motif |
|-----------------|------------|--------------------------------|-------|
| AtMYB-84_M00970 | 2.9306e-07 | NCGGGNNAGCTGG<br>-GGNGGTAGGTGS |       |



|              |            |                                |
|--------------|------------|--------------------------------|
| AtMYB84      | 1.0492e-06 | NCGGGNNAGCTGG<br>NNGNGGTAGGTGS |
| HEB_M00698   | 2.4358e-05 | NCGGGNNAGCTGG<br>-----CAGCWGG  |
| TAL1_M00993  | 2.8594e-05 | NCGGGNNAGCTGG<br>----RNCAGNTGG |
| LBP-1_M00644 | 4.5927e-05 | CCAGCTNNCCCGN<br>SCAGCN-----   |

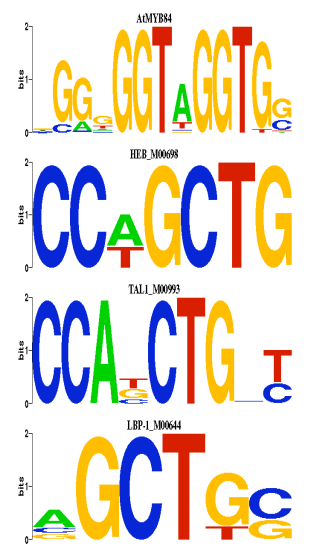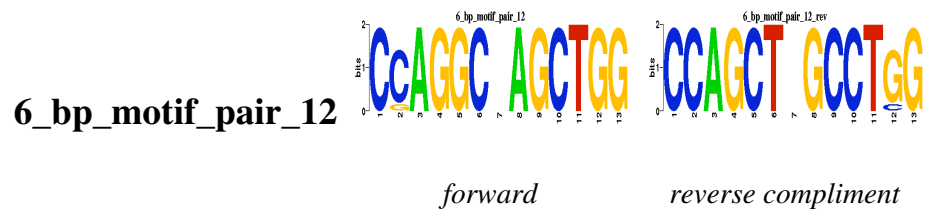

| Name            | E value    | Alignment                                               | Motif |
|-----------------|------------|---------------------------------------------------------|-------|
| LEGUMINBOXLEGA5 | 2.6417e-06 | -----CCAGCTNGCCTGG-----<br>GACATTCTKCAGYWTGCATGGCTATGGA |       |
| LUN-1_M00480    | 1.7387e-05 | --CCAGGCNAGCTGG--<br>TCCCAAAGTAGCTGGG                   |       |
| AhR_M00139      | 2.3348e-05 | --CCAGGCNAGCTGG--<br>TSTCACGCNASNYNGRG                  |       |
| HEB_M00698      | 2.4358e-05 | CCAGGCNAGCTGG<br>-----CAGCWGG                           |       |
| PE3ASPHYA3      | 3.4402e-05 | CCAGCTNGCCTGG-----<br>-CAGCTCCCATGGCTCTCCCATCCGCGCCGGT  |       |

8\_bp\_motif\_7

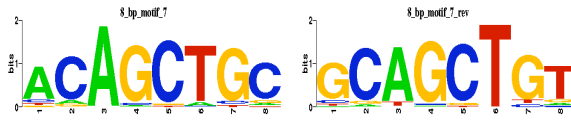

*forward*

*reverse compliment*

| <i>Name</i>     | <i>E value</i> | <i>Alignment</i>             |
|-----------------|----------------|------------------------------|
| AP-4_M00927     | 2.0371e-09     | GCAGCTGT<br>RCAGCTGN         |
| myogenin_M00712 | 2.5841e-09     | ACAGCTGC<br>-CASCTGN         |
| NHLH1           | 5.2790e-08     | --GCAGCTGT--<br>NCGCAGCTGCGN |
| LBP-1_M00644    | 6.2764e-08     | GCAGCTGT<br>SCAGCN--         |
| TAL1_M00993     | 1.4780e-07     | -GCAGCTGT<br>RNCAGNTGG       |

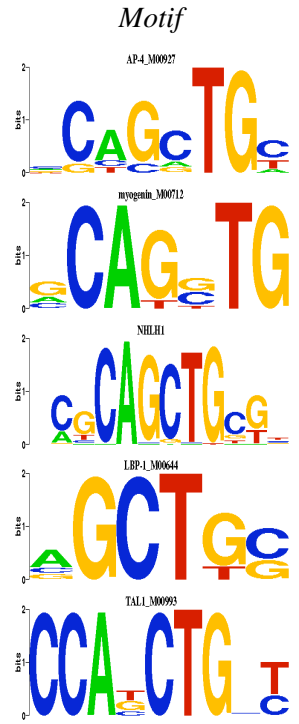

8\_bp\_motif\_pair\_10

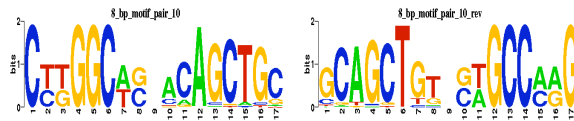

*forward*

*reverse compliment*

| <i>Name</i>     | <i>E value</i> | <i>Alignment</i>                   |
|-----------------|----------------|------------------------------------|
| myogenin_M00712 | 6.4628e-07     | GCAGCTGTNSWGCCMRG<br>NCAGSTG-----  |
| AP-4_M00927     | 2.5859e-06     | GCAGCTGTNSWGCCMRG<br>RCAGCTGN----- |

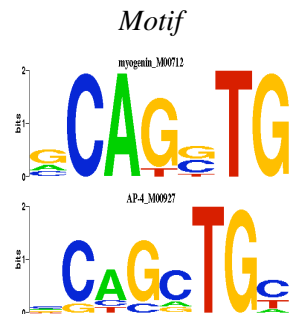

|              |            |                                   |
|--------------|------------|-----------------------------------|
| LBP-1_M00644 | 2.8269e-06 | GCAGCTGTNSWGCCMRG<br>SCAGCN-----  |
| RIM101       | 5.3733e-06 | GCAGCTGTNSWGCCMRG<br>-----TGCCAAG |
| HEB_M00698   | 6.4936e-05 | GCAGCTGTNSWGCCMRG<br>CCWGCTG----- |

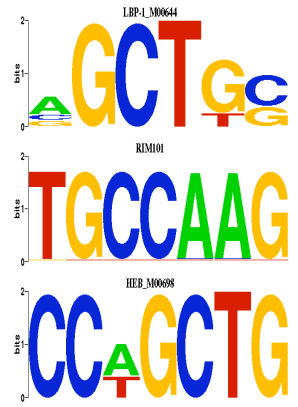

**8\_bp\_motif\_pair\_12**

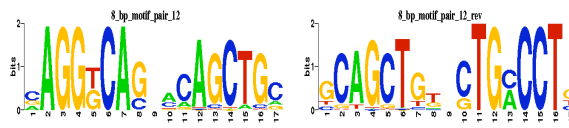

*forward*

*reverse compliment*

| <i>Name</i>     | <i>E value</i> | <i>Alignment</i>                           |
|-----------------|----------------|--------------------------------------------|
| fadR            | 8.3766e-07     | GCAGCTGKNCTGMCCTN--<br>--ARCTGGTCNGAYNWNTW |
| myogenin_M00712 | 9.8346e-07     | GCAGCTGKNCTGMCCTN<br>NCAGSTG-----          |
| AP-4_M00927     | 3.2181e-06     | GCAGCTGKNCTGMCCTN<br>RCAGCTGN-----         |
| LBP-1_M00644    | 4.1196e-06     | GCAGCTGKNCTGMCCTN<br>SCAGCN-----           |
| QELEMENTZM13    | 1.0424e-05     | GCAGCTGKNCTGMCCTN<br>-----TGACCT-          |

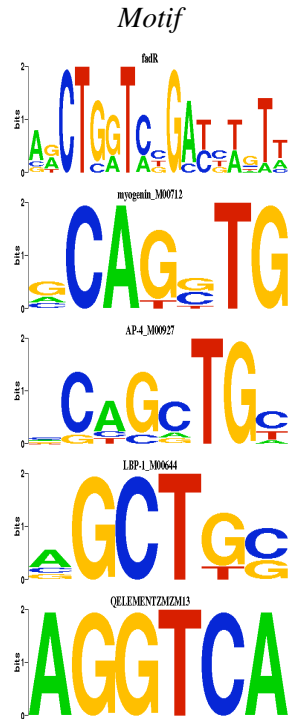

**10\_bp\_motif\_5**

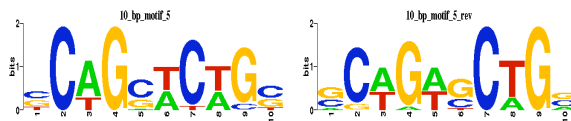

|                 | <i>forward</i> | <i>reverse compliment</i>                    |              |
|-----------------|----------------|----------------------------------------------|--------------|
| <i>Name</i>     | <i>E value</i> | <i>Alignment</i>                             | <i>Motif</i> |
| Eve_M00629      | 2.5169e-06     | SCWGWGCTGN<br>GCNGNSSWN-                     |              |
| Dde_M00304      | 2.4450e-05     | NCAGCWCWGS-<br>---GCTCAGCC                   |              |
| Sry-beta_M00666 | 3.5655e-05     | NCAGCWCWGS<br>GCATCWCT--                     |              |
| SMb20667        | 5.0651e-05     | -----NCAGCWCWGS-----<br>GGTTGGCAGCGCTGCCAAAA |              |
| D4GMAUX28       | 6.2154e-05     | NCAGCWCWGS<br>ACAGCACTA-                     |              |

**10\_bp\_motif\_pair\_8**

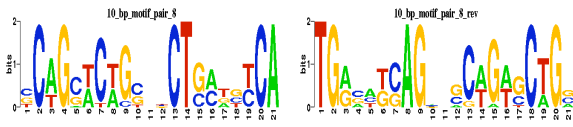

|                 | <i>forward</i> | <i>reverse compliment</i>                     |              |
|-----------------|----------------|-----------------------------------------------|--------------|
| <i>Name</i>     | <i>E value</i> | <i>Alignment</i>                              | <i>Motif</i> |
| Eve_M00629      | 1.8556e-04     | TGRNNKCAGNNSCWGWGCTGN<br>-----GCNGNSSWN-      |              |
| Myf             | 5.1490e-04     | NCAGCWCWGSNNCTGMNNYCA<br>-----CAGCAGYTGCYK--- |              |
| Dde_M00304      | 6.8358e-04     | NCAGCWCWGSNNCTGMNNYCA<br>---GCTCAGCC-----     |              |
| Sry-beta_M00666 | 9.3272e-04     | NCAGCWCWGSNNCTGMNNYCA<br>GCATCWCT-----        |              |

LBP-1\_M00644 1.2135e-03

NCAGCWCWGSNNCTGMNNYCA  
SCAGCN-----

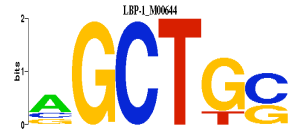

**10\_bp\_motif\_pair\_14**

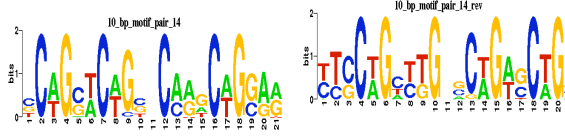

*forward*

*reverse compliment*

| Name         | E value    | Alignment                                    | Motif |
|--------------|------------|----------------------------------------------|-------|
| Eve_M00629   | 2.2152e-04 | YTCCWGYYTGNNCWGWSC TGN<br>-----GCNGNSSWN-    |       |
| HEB_M00698   | 3.6926e-04 | NCAGSWCWGNNCARRCWGGAR<br>-----CAGCWGG--      |       |
| Dde_M00304   | 8.2179e-04 | YTCCWGYYTGNNCWGWSC TGN<br>-----GGCTGAGC---   |       |
| CDC5_M00361  | 9.5759e-04 | YTCCWGYYTGNNCWGWSC TGN<br>-----NSCGCTGAGS--- |       |
| LBP-1_M00644 | 1.2875e-03 | YTCCWGYYTGNNCWGWSC TGN<br>--SCAGCN-----      |       |

**12\_bp\_motif\_13**

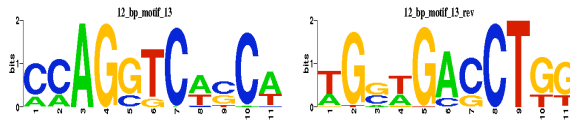

*forward*

*reverse compliment*

| Name | E value | Alignment | Motif |
|------|---------|-----------|-------|
|------|---------|-----------|-------|

|               |            |                                      |
|---------------|------------|--------------------------------------|
| bZIP911_1     | 3.6010e-07 | TGSWGACCTGG--<br>-GRTGACGTGGCC       |
| QELEMENTZM3   | 4.7185e-07 | CCAGGTCWSCA<br>--AGGTCA---           |
| bZIP911       | 5.9518e-07 | --CCAGGTCWSCA<br>GGCCACGTCAYC-       |
| Pax-6_M00979  | 8.1651e-07 | -----CCAGGTCWSCA<br>KAGTTCCAGGTCA--- |
| HBP-1a_M00936 | 8.7844e-07 | CCAGGTCWSCA<br>NCACGTCAS--           |

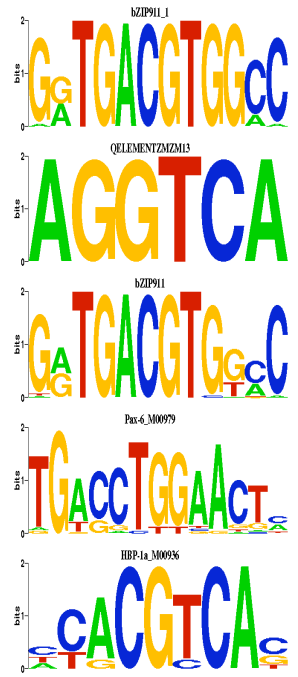

8\_bp\_motif\_10

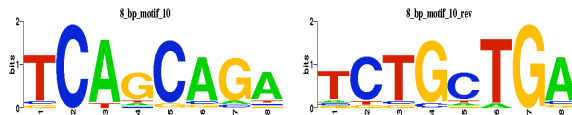

*forward*

*reverse compliment*

| Name             | E value    | Alignment                                     | Motif |
|------------------|------------|-----------------------------------------------|-------|
| LMAF_M01139      | 4.8101e-10 | -TCAGCAGA<br>STCAGCAG-                        |       |
| Bel-1_M00312     | 8.3565e-06 | -TCTGCTGA-----<br>ANCTGCTGAYRCWGMGNKNACTNYCNM |       |
| ANAERO2CONSENSUS | 1.9611e-05 | TCTGCTGA<br>GCTGCT--                          |       |
| bZIP910_M00357   | 2.8962e-05 | ---TCAGCAGA<br>ACGTCAGCAYS                    |       |
| HEB_M00698       | 3.9071e-05 | TCAGCAGA<br>-CAGCWGG                          |       |

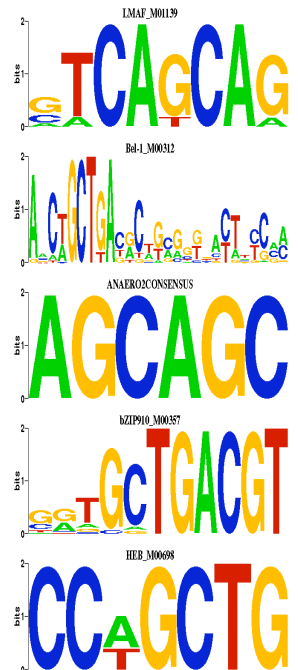

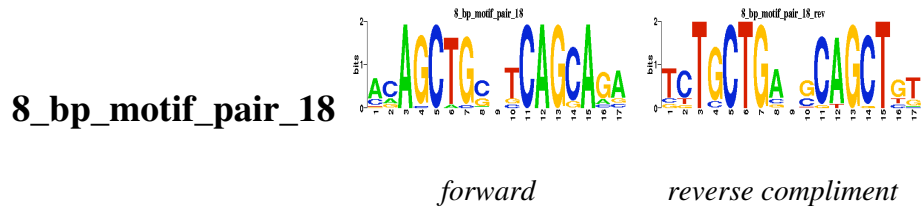

| <i>Name</i>     | <i>E value</i> | <i>Alignment</i>                                       | <i>Motif</i> |
|-----------------|----------------|--------------------------------------------------------|--------------|
| Bel-1_M00312    | 6.8351e-09     | -TCTGCTGANGCAGCTGT-----<br>ANCTGCTGAYRCWGMGNKNACTNYCNM |              |
| LMAF_M01139     | 6.8033e-07     | ACAGCTGCNTCAGCAGA<br>-----STCAGCAG-                    |              |
| E2A_M00804      | 8.9024e-07     | TCTGCTGANGCAGCTGT<br>---NMNGNGNCAGGTG-                 |              |
| myogenin_M00712 | 9.3465e-07     | ACAGCTGCNTCAGCAGA<br>-CASCTGN-----                     |              |
| LBP-1_M00644    | 1.1528e-06     | ACAGCTGCNTCAGCAGA<br>--NGCTGS-----                     |              |

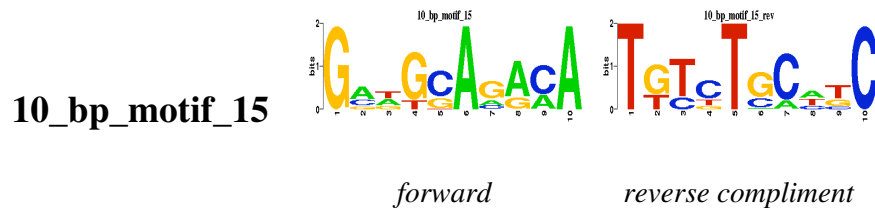

| <i>Name</i>  | <i>E value</i> | <i>Alignment</i>                 | <i>Motif</i> |
|--------------|----------------|----------------------------------|--------------|
| SMAD4_M00733 | 6.8940e-06     | ---TGTCTGCNKC-<br>RGNTGKCTGNMYSN |              |
| ARF          | 1.9934e-04     | GMNGCAGACA<br>----GAGACA         |              |

|                |            |                            |
|----------------|------------|----------------------------|
| ARF1           | 1.9934e-04 | GMNGCAGACA<br>----GAGACA   |
| ARFAT          | 1.9934e-04 | GMNGCAGACA<br>----GAGACA   |
| bZIP910_M00357 | 2.4184e-04 | -TGTCTGCNKC<br>ACGTCAGCAYS |

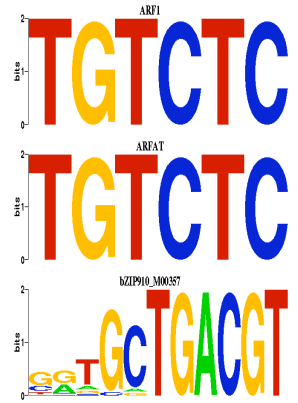

10\_bp\_motif\_pair\_17

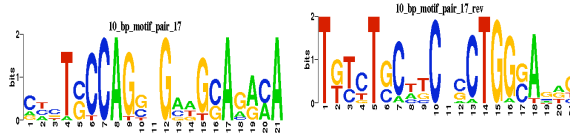

*forward*

*reverse compliment*

| <i>Name</i>  | <i>E value</i> | <i>Alignment</i>                               | <i>Motif</i> |
|--------------|----------------|------------------------------------------------|--------------|
| MAZ_M00649   | 5.4899e-05     | CNNTSCCAGSNGMNGCAGAMA<br>CCCTCCC-----          |              |
| EBF_M00977   | 6.1580e-05     | TKTCTGCNKCNSCTGGSANNG<br>-----TCCYWGRGN---     |              |
| Lyf-1_M00141 | 1.0823e-04     | CNNTSCCAGSNGMNGCAGAMA<br>-YCTCCAA-----         |              |
| DEC_M00997   | 2.7212e-04     | TKTCTGCNKCNSCTGGSANNG<br>-----NNNTCACNTGNN---- |              |
| BOXCPSAS1_3  | 4.7401e-04     | TKTCTGCNKCNSCTGGSANNG<br>-----GTGGGAG--        |              |

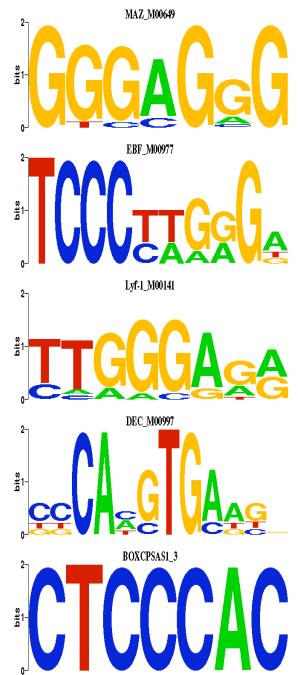

12\_bp\_motif\_20

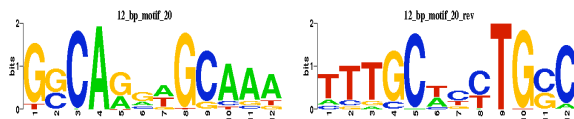



|             | <i>forward</i> | <i>reverse compliment</i>            |
|-------------|----------------|--------------------------------------|
| <i>Name</i> | <i>E value</i> | <i>Alignment</i>                     |
| sna         | 3.2668e-05     | TTTGCWYCTGSC<br>----CACCTG--         |
| Sn_M00060   | 4.3877e-05     | TTTGCWYCTGSC-<br>-NKRCACCTGTYN       |
| RAV1-B      | 4.6503e-05     | TTTGCWYCTGSC<br>----CACCTG--         |
| RAV1BAT     | 4.6503e-05     | TTTGCWYCTGSC<br>----CACCTG--         |
| RNFG2OS     | 5.7789e-05     | GSCAGRWGCAAA----<br>-CCAGGGGCACACTGG |

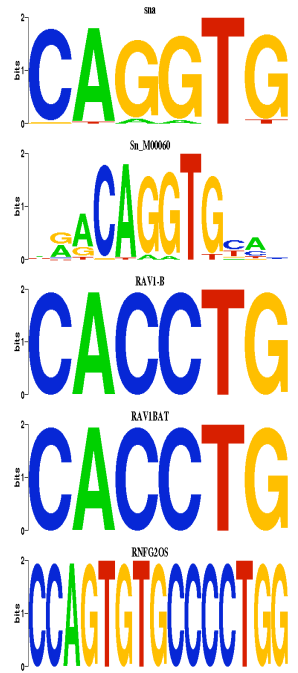

**10\_bp\_motif\_6**

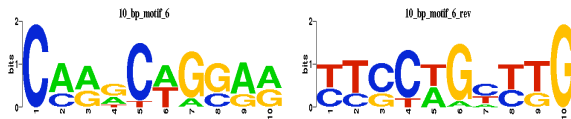

|               | <i>forward</i> | <i>reverse compliment</i>        |
|---------------|----------------|----------------------------------|
| <i>Name</i>   | <i>E value</i> | <i>Alignment</i>                 |
| Barbie_M00238 | 2.9175e-05     | -YTCCWGYITG---<br>CMNNCNSCTTTNNN |
| HEB_M00698    | 3.0153e-05     | CARRCWGGAR<br>-CAGCWGG--         |
| RBENTGA3      | 3.7070e-05     | --CARRCWGGAR<br>TCCAAGTTGGA-     |
| LBP-1_M00644  | 1.7282e-04     | YTCCWGYITG<br>--SCAGCN--         |

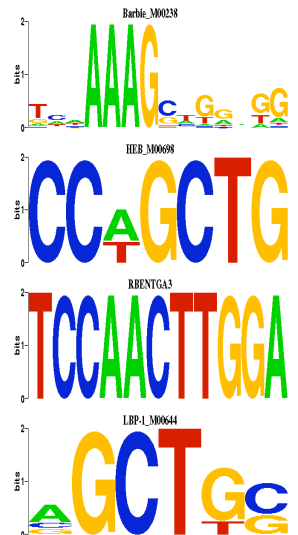

Stamp Results

09/05/08

KAISO\_M01119 2.7966e-04

CARRCWGGAR  
NTNGCAGGA-

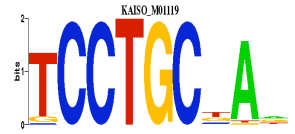

10\_bp\_motif\_pair\_16

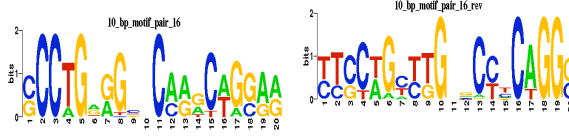

*forward*

*reverse compliment*

| Name              | E value    | Alignment                                     | Motif |
|-------------------|------------|-----------------------------------------------|-------|
| TFAP2A            | 9.5223e-05 | SCCTGRGGNNCARRCWGGAR<br>SCNNNNGGC-----        |       |
| AP-2alphaA_M01045 | 4.4591e-04 | ---SCCTGRGGNNCARRCWGGAR<br>NNNSCTNAGGCNN----- |       |
| HEB_M00698        | 5.8862e-04 | SCCTGRGGNNCARRCWGGAR<br>-----CAGCWGG--        |       |
| RNFG2OS           | 6.8632e-04 | SCCTGRGGNNCARRCWGGAR<br>-CCAGGGGCACACTGG----  |       |
| AP-2alpha_M00469  | 1.7270e-03 | SCCTGRGGNNCARRCWGGAR<br>SCNNNNGG-----         |       |

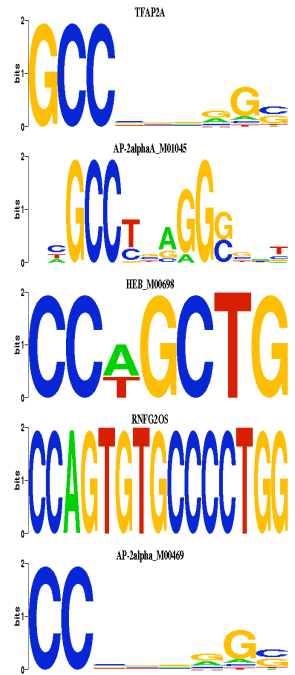

10\_bp\_motif\_pair\_10

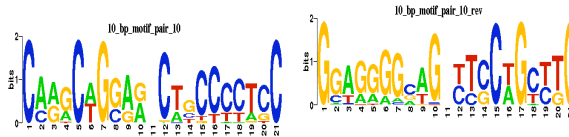

*forward*

*reverse compliment*

| Name | E value | Alignment | Motif |
|------|---------|-----------|-------|
|------|---------|-----------|-------|

Stamp Results

09/05/08

|                  |            |                                                  |
|------------------|------------|--------------------------------------------------|
| MAZ_M00649       | 9.9365e-05 | CARGCWGGARNCTNCCCCTCC-<br>-----CCCTCCC           |
| SMAD4_M00733     | 2.3887e-04 | GGAGGGGNAGNYTCCWGCYTG<br>--NSRKNCAGMCANCY-----   |
| UF1H3BETA_M01068 | 2.8318e-04 | -----GGAGGGGNAGNYTCCWGCYTG<br>GYGGGGGAGGGGC----- |
| HEB_M00698       | 5.8854e-04 | GGAGGGGNAGNYTCCWGCYTG<br>-----CCWGCIG-           |
| MAF_M00648       | 8.3733e-04 | CARGCWGGARNCTNCCCCTCC<br>-----NSNMMACTTCCYYCN-   |

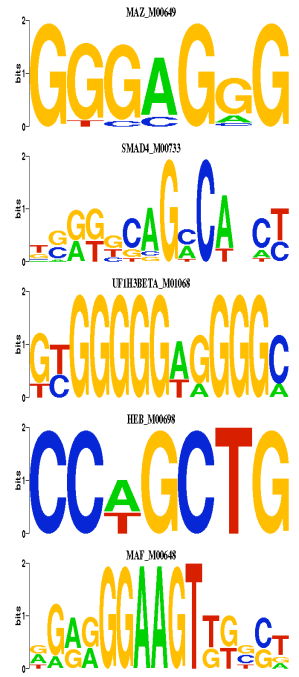

10\_bp\_motif\_pair\_18

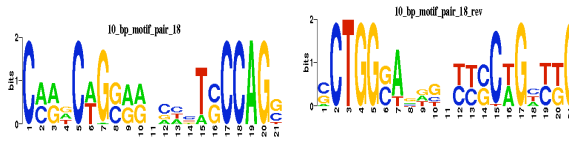

*forward*

*reverse compliment*

| Name         | E value    | Alignment                                        |
|--------------|------------|--------------------------------------------------|
| MAZ_M00649   | 6.1165e-05 | CMRNCWGSRRNNNNTSCCAGS<br>-----CCCTCCC---         |
| Lyf-1_M00141 | 1.1725e-04 | CMRNCWGSRRNNNNTSCCAGS<br>-----YCTCCCAA-          |
| YcjW_EC      | 2.7920e-04 | -SCTGGSANNNNYSCWGNKYG<br>WMNTGGKAGCGSTCCCAIRA--  |
| SAV1329      | 4.4751e-04 | CMRNCWGSRRNNNNTSCCAGS-<br>--NACTGTGAGCGCTCACAGTA |

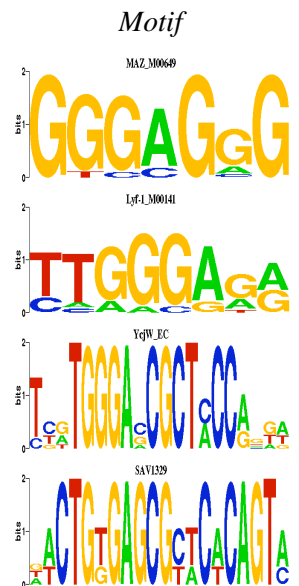

BOXCPSAS1\_3 5.0975e-04

SCTGGSANNNNYSCWGNKYK  
-GTGGGAG-----

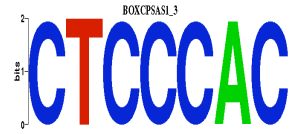

8\_bp\_motif\_13

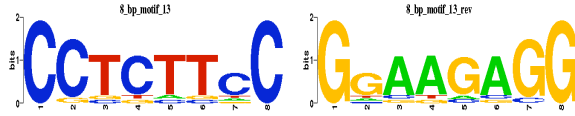

*forward*

*reverse compliment*

| Name           | E value    | Alignment                          |
|----------------|------------|------------------------------------|
| Nrf-2_M00108   | 2.4532e-08 | --GGAAGAGG<br>CCGGAAGNS-           |
| GABPA          | 8.2304e-08 | ---GGAAGAGG<br>ACCGAAGNS-          |
| NODCON2GM      | 2.0622e-06 | GGAAGAGG<br>--AAGAG-               |
| OSE2ROOTNODULE | 2.0622e-06 | GGAAGAGG<br>--AAGAG-               |
| IXR1           | 2.3075e-05 | -----GGAAGAGG--<br>AARCCGKAAGCGGTG |

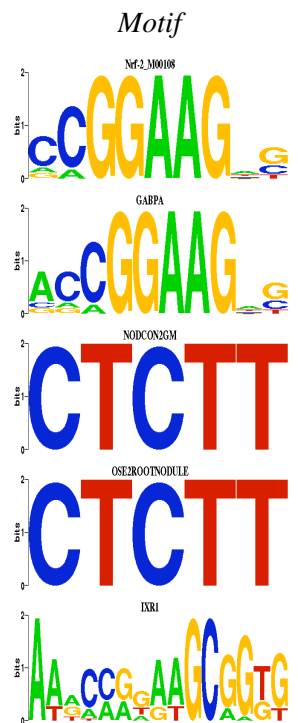

8\_bp\_motif\_pair\_7

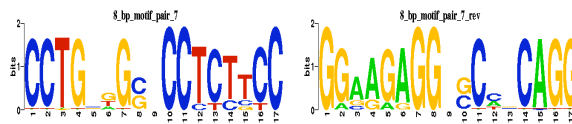

*forward*

*reverse compliment*

| Name         | E value    | Alignment                             |
|--------------|------------|---------------------------------------|
| Nrf-2_M00108 | 5.5746e-05 | --GGAAGAGGNSCNNCAGG<br>CCGGAAGNS----- |

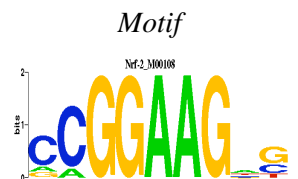

|                |            |                                        |
|----------------|------------|----------------------------------------|
| ABRECE3ZMRAB28 | 5.8515e-05 | GGAAGAGGNSCNCAGG<br>-GAGGAGGC GCGT---- |
| NODCON2GM      | 6.5958e-05 | GGAAGAGGNSCNCAGG<br>--AAGAG-----       |
| OSE2ROOTNODULE | 6.5958e-05 | GGAAGAGGNSCNCAGG<br>--AAGAG-----       |
| ERE            | 1.5383e-04 | CCTGNNGSNCTCTTCC<br>-----GCGGCTCTTA-   |

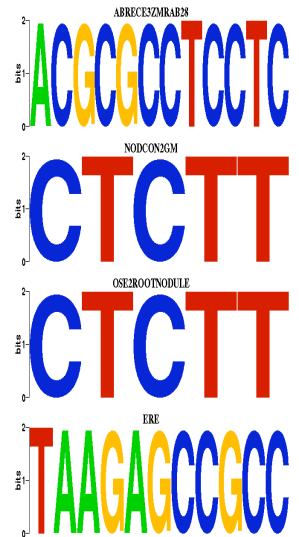

8\_bp\_motif\_pair\_19

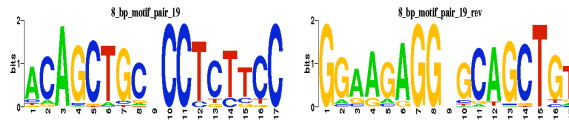

*forward*

*reverse compliment*

| Name            | E value    | Alignment                               |
|-----------------|------------|-----------------------------------------|
| myogenin_M00712 | 6.7044e-07 | ACAGCTGCNCCTCTTCC<br>-CASCTGN-----      |
| AP-4_M00927     | 1.7800e-06 | GGAAGAGGNGCAGCTGT<br>-----RCAGCTGN      |
| LBP-1_M00644    | 4.1953e-06 | GGAAGAGGNGCAGCTGT<br>-----SCAGCN--      |
| ABRECE3ZMRAB28  | 1.5908e-05 | GGAAGAGGNGCAGCTGT<br>-GAGGAGGC GCGT---- |
| Nrf-2_M00108    | 4.5578e-05 | ACAGCTGCNCCTCTTCC--<br>-----SNCTTCCGG   |

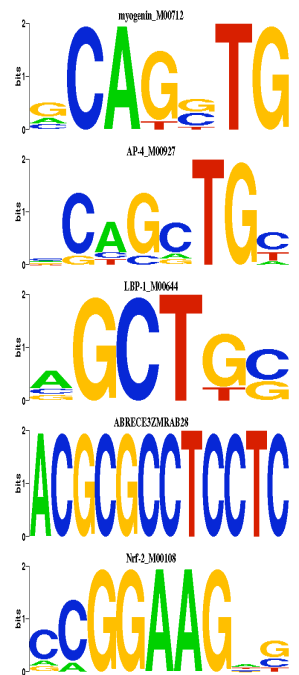

**10\_bp\_motif\_9**

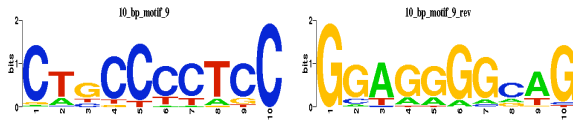

*forward*

*reverse compliment*

| Name             | E value    | Alignment                         |
|------------------|------------|-----------------------------------|
| UF1H3BETA_M01068 | 3.9237e-08 | CTGCCCTCC-----<br>--GCCCTCCCCRC   |
| MAZ_M00649       | 2.4440e-06 | -GGAGGGCAG<br>GGGAGGG----         |
| Alfin1_M00479    | 2.1940e-05 | CTGCCCTCC----<br>MNNCCCCACNYNYN   |
| MZF1_M00084      | 2.7952e-05 | CTGCCCTCC--<br>TTNCCCCTCNNN       |
| RNFG2OS          | 6.3639e-05 | GGAGGGCAG-----<br>CCAGGGGCACACTGG |

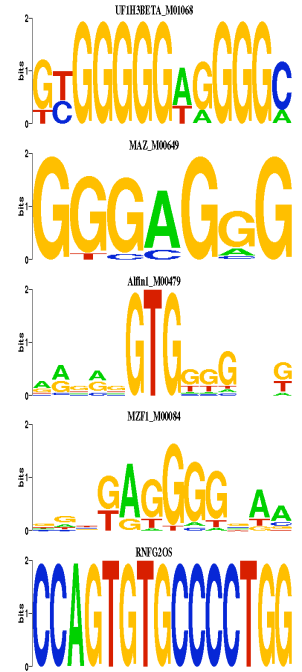

**10\_bp\_motif\_pair\_9**

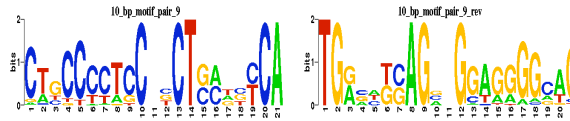

*forward*

*reverse compliment*

| Name             | E value    | Alignment                                    |
|------------------|------------|----------------------------------------------|
| UF1H3BETA_M01068 | 1.9055e-07 | TGRNKSAGNNGGAGGGGCAG<br>-----GYGGGGGAGGGGC-- |
| MAZ_M00649       | 7.7234e-05 | CTGCCCTCCNNTSMNNYCA<br>----CCCTCC-----       |

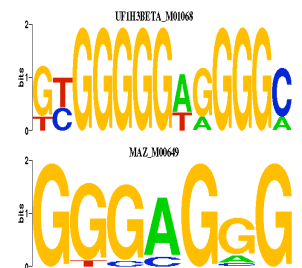

|               |            |                                            |
|---------------|------------|--------------------------------------------|
| TFII-I_M00706 | 5.3432e-04 | TGRNNKSAGNNGGAGGGGCAG<br>-----GANGKAG----- |
| Alfin1_M00479 | 8.9603e-04 | CTGCCCTCCNCTSMNNYCA<br>MNNCCCCACNYNYN----- |
| MNF1ZMPPC1    | 1.4984e-03 | TGRNNKSAGNNGGAGGGGCAG<br>-----AAGGGCAC     |

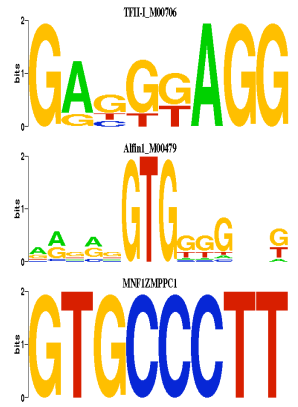

10\_bp\_motif\_pair\_1

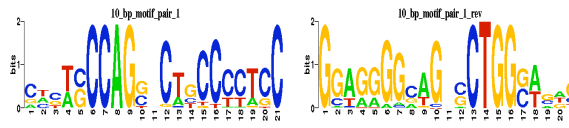

*forward*                      *reverse compliment*

| Name             | E value    | Alignment                                                     | Motif |
|------------------|------------|---------------------------------------------------------------|-------|
| PE3ASPHYA3       | 8.9793e-06 | -----GGAGGGGNAGNSCTGGSANNS-<br>ACCGGCGCGGATGGGAGGCCATGGGAGCTG |       |
| SMb20667         | 7.4696e-05 | GGAGGGGNAGNSCTGGSANNS<br>-GGTTGGCAGCGCTGCCAAAA                |       |
| MAZ_M00649       | 9.9026e-05 | SNNTSCCAGSNCTNCCCCCTCC-<br>-----CCCTCCC                       |       |
| UF1H3BETA_M01068 | 2.5424e-04 | SNNTSCCAGSNCTNCCCCCTCC-----<br>-----GCCCTCCCCRC               |       |
| Eve_M00629       | 6.1766e-04 | GGAGGGGNAGNSCTGGSANNS<br>-----GCNGNSWN-----                   |       |

10\_bp\_motif\_pair\_4

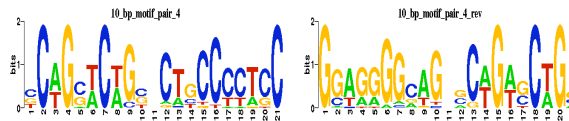

|                  | <i>forward</i> | <i>reverse compliment</i>                      |                                                                                     |
|------------------|----------------|------------------------------------------------|-------------------------------------------------------------------------------------|
| <i>Name</i>      | <i>E value</i> | <i>Alignment</i>                               | <i>Motif</i>                                                                        |
| GAL4             | 7.6524e-07     | GGAGGGGCAGNNCWGWSCTGN<br>-NCGGNGNANTNYNNTCCG-- |  |
| MAZ_M00649       | 9.2956e-05     | -GGAGGGGCAGNNCWGWSCTGN<br>GGGAGGG-----         |  |
| Eve_M00629       | 1.0850e-04     | GGAGGGGCAGNNCWGWSCTGN<br>-----GCNGNSSWN-----   |  |
| UF1H3BETA_M01068 | 2.2099e-04     | NCAGSWCWGNNCTGCCCTCC-----<br>-----GCCCTCCCCRC  |  |
| Dde_M00304       | 8.0321e-04     | GGAGGGGCAGNNCWGWSCTGN<br>-----GGCTGAGC-----    |  |

**12\_bp\_motif\_9**

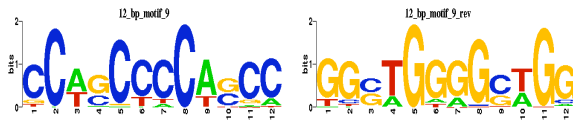

|                    | <i>forward</i> | <i>reverse compliment</i>          |                                                                                       |
|--------------------|----------------|------------------------------------|---------------------------------------------------------------------------------------|
| <i>Name</i>        | <i>E value</i> | <i>Alignment</i>                   | <i>Motif</i>                                                                          |
| Alfin1_M00479      | 3.5246e-08     | ---GGSTGGGGCWGG<br>NRNRNGTGGGGNNK- |  |
| CAC-binding_M00720 | 2.8952e-07     | CCWGCCCCASCC-<br>-----CCCASCCY     |  |
| GBF_M00633         | 4.5652e-07     | GGSTGGGGCWGG<br>---TNGGGGTN-       |  |
| KROX_M00982        | 2.2341e-06     | -GGSTGGGGCWGG<br>GNNNGGGGGCGG      |  |



UF1H3BETA\_M01068 3.4296e-06

GGSTGGGGCWGG---  
 --GYGGGGGAGGGGC

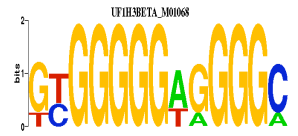

12\_bp\_motif\_pair\_1

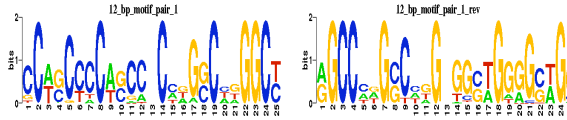

*forward*                      *reverse compliment*

| Name               | E value    | Alignment                                       | Motif |
|--------------------|------------|-------------------------------------------------|-------|
| UF1H3BETA_M01068   | 8.8664e-06 | CCWSCCCASCNCNNGSCNNGGCY<br>---GCCCTCCCCRC-----  |       |
| CAC-binding_M00720 | 1.0578e-05 | CCWSCCCASCNCNNGSCNNGGCY<br>-----CCASCY-----     |       |
| GBF_M00633         | 1.8998e-05 | CCWSCCCASCNCNNGSCNNGGCY<br>-NACCCNA-----        |       |
| Alfin1_M00479      | 2.5117e-05 | CCWSCCCASCNCNNGSCNNGGCY<br>-MNNCCCCACNYNYN----- |       |
| KROX_M00982        | 2.6734e-04 | RGCCNNGSCNNGNGGSTGGGGSWGG<br>-----GNNNGGGGGCGG- |       |

12\_bp\_motif\_pair\_7

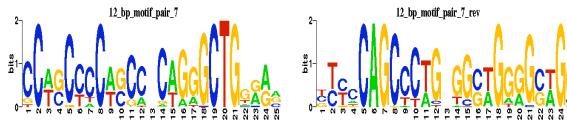

*forward*                      *reverse compliment*

| Name             | E value    | Alignment                                          | Motif |
|------------------|------------|----------------------------------------------------|-------|
| UF1H3BETA_M01068 | 7.2530e-07 | NTYCCAGCCCTGNGGSTGGGGSWGG<br>-----GYGGGGGAGGGGC--- |       |

|                    |            |                                                |
|--------------------|------------|------------------------------------------------|
| CAC-binding_M00720 | 1.8086e-05 | CCWSCCCASCNCAGGGCTGGRAN<br>-----CCCASCCY-----  |
| GBF_M00633         | 3.3506e-05 | NTYCCAGCCCTGNNGGSTGGGGSWGG<br>-----TNGGGGTN-   |
| Alfin1_M00479      | 8.8548e-05 | CCWSCCCASCNCAGGGCTGGRAN<br>-MNNCCCCACNYYN----- |
| E2FAT              | 1.7683e-04 | CCWSCCCASCNCAGGGCTGGRAN<br>-----GCGGGARA       |

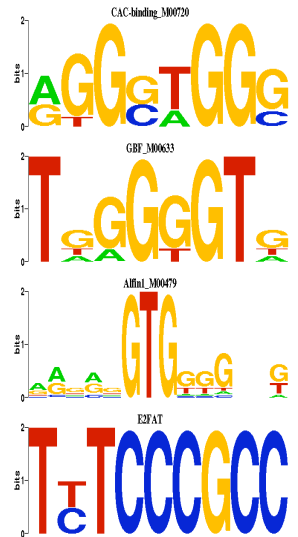

**12\_bp\_motif\_pair\_8**

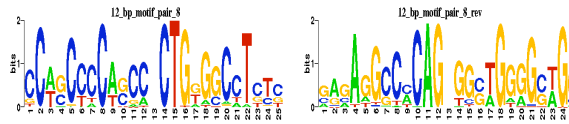

*forward*

*reverse compliment*

| <i>Name</i>        | <i>E value</i> | <i>Alignment</i>                                       | <i>Motif</i> |
|--------------------|----------------|--------------------------------------------------------|--------------|
| CAC-binding_M00720 | 8.4158e-06     | CCWSCCCASCNCCTGKGGCCTSTS<br>-----CCCASCCY-----         |              |
| GBF_M00633         | 9.5902e-06     | SASAGCCMCAGNNGGSTGGGGSWGG<br>-----TNGGGGTN-            |              |
| UF1H3BETA_M01068   | 1.0834e-05     | CCWSCCCASCNCCTGKGGCCTSTS<br>---GCCCTCCCCRC-----        |              |
| Alfin1_M00479      | 1.1273e-05     | CCWSCCCASCNCCTGKGGCCTSTS<br>-MNNCCCCACNYYN-----        |              |
| LUN-1_M00480       | 3.7330e-05     | SASAGCCMCAGNNGGSTGGGGSWGG<br>----TCCCAAAGTAGCTGGG----- |              |

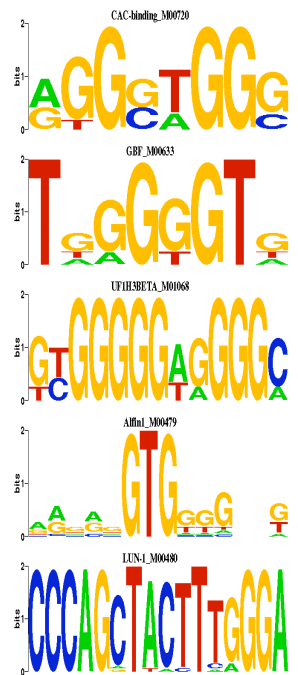

12\_bp\_motif\_pair\_12

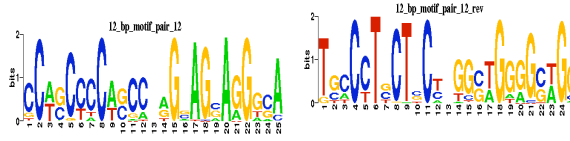

*forward*

*reverse compliment*

| <i>Name</i>        | <i>E value</i> | <i>Alignment</i>                                | <i>Motif</i> |
|--------------------|----------------|-------------------------------------------------|--------------|
| CAC-binding_M00720 | 1.0578e-05     | CCWSCCCASCCNRGNAGNAGGGSA<br>-----CCCASCCY-----  |              |
| GBF_M00633         | 1.8998e-05     | CCWSCCCASCCNRGNAGNAGGGSA<br>-NACCCNA-----       |              |
| TAL1_M00993        | 1.3493e-04     | CCWSCCCASCCNRGNAGNAGGGSA<br>-----RNCAGNTGG---   |              |
| Alfin1_M00479      | 1.7215e-04     | CCWSCCCASCCNRGNAGNAGGGSA<br>-MNNCCCCACNYYN----- |              |
| UF1H3BETA_M01068   | 3.5286e-04     | ---CCWSCCCASCCNRGNAGNAGGGSA<br>GCCCTCCCCRC----- |              |

12\_bp\_motif\_pair\_13

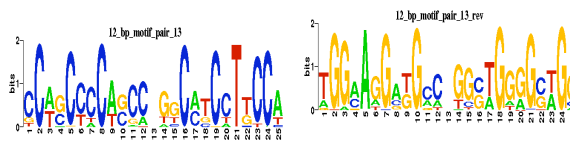

*forward*

*reverse compliment*

| <i>Name</i>        | <i>E value</i> | <i>Alignment</i>                               | <i>Motif</i> |
|--------------------|----------------|------------------------------------------------|--------------|
| CAC-binding_M00720 | 9.3693e-06     | CCWSCCCASCCNGKCMTCCTKCCA<br>-----CCCASCCY----- |              |
| GBF_M00633         | 9.3929e-06     | TGGMAGGAKGMCNGGSTGGGGSWGG<br>-----TNGGGGTN-    |              |

|                  |            |                                                    |
|------------------|------------|----------------------------------------------------|
| Alfin1_M00479    | 1.1001e-04 | TGGMAGGAKGMCNGGSTGGGGSWGG<br>-----NRNRNGTGGGGNNK-- |
| UF1H3BETA_M01068 | 1.1231e-04 | CCWSCCCASCNGKCMTCCTKCCA<br>---GCCCTCCCCRC-----     |
| KROX_M00982      | 2.5091e-04 | TGGMAGGAKGMCNGGSTGGGGSWGG<br>-----GNNNGGGGGGCGG    |

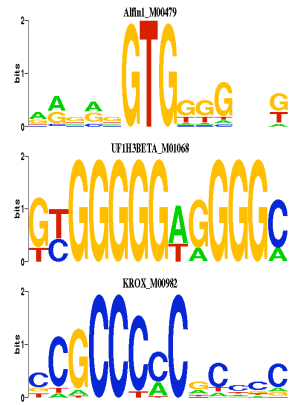

10\_bp\_motif\_11

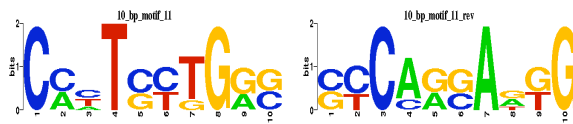

forward

reverse compliment

| Name         | E value    | Alignment                            |
|--------------|------------|--------------------------------------|
| LMAF_M01139  | 7.0766e-05 | CMNTSYTGGS<br>--CTGCTGAS             |
| Roaz         | 3.1838e-04 | -CMNTSYTGGS----<br>GNMMCCYTRGGKKSC   |
| TTF1_M00432  | 3.3947e-04 | CMNTSYTGGS<br>-AYACTTGAS             |
| PacC_M00247  | 3.4980e-04 | ---CMNTSYTGGS---<br>NNNNNNKCYTGCCNGN |
| Tel-2_M00678 | 4.7946e-04 | -CMNTSYTGGS<br>TACTTCCTG--           |

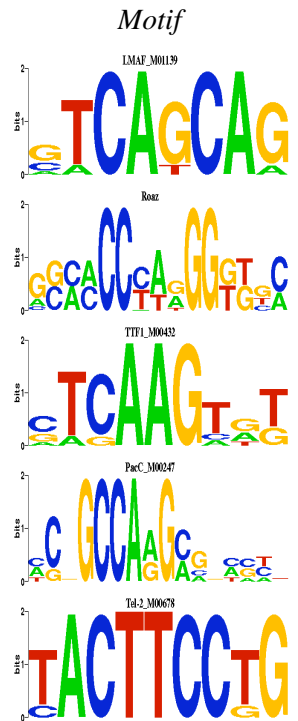

10\_bp\_motif\_pair\_15

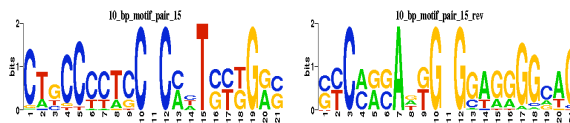

*forward*                      *reverse compliment*

| <i>Name</i>      | <i>E value</i> | <i>Alignment</i>                             | <i>Motif</i>                                                                        |
|------------------|----------------|----------------------------------------------|-------------------------------------------------------------------------------------|
| UF1H3BETA_M01068 | 4.5768e-08     | CTKCCCCTCCNCMNTSYKGRS<br>--GCCCTCCCCRC-----  |  |
| MAZ_M00649       | 9.8262e-05     | CTKCCCCTCCNCMNTSYKGRS<br>----CCCTCC-----     |  |
| Alfin1_M00479    | 3.4831e-04     | CTKCCCCTCCNCMNTSYKGRS<br>MNNCCCCACNYNYN----- |  |
| ABRECE3ZMRAB28   | 3.9395e-04     | CTKCCCCTCCNCMNTSYKGRS<br>ACGCGCCTCCTC-----   |  |
| ZNF219_M01122    | 8.8127e-04     | SYCMRSANKGNGGAGGGGMAG<br>-----GGNGGGGGGN--   |  |

**6\_bp\_motif\_6**

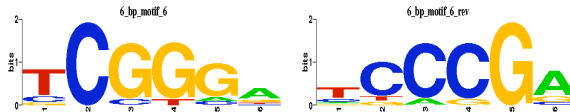

*forward*                      *reverse compliment*

| <i>Name</i> | <i>E value</i> | <i>Alignment</i>                      | <i>Motif</i>                                                                          |
|-------------|----------------|---------------------------------------|---------------------------------------------------------------------------------------|
| ANT_M00501  | 8.1812e-07     | -----TCCCGA--<br>ACANWTCCCRAG         | 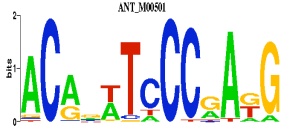 |
| ScrR_VC     | 1.0918e-06     | -----TCCCGA--<br>AATTGNNAACGTTCCCGAAA |  |
| ANT         | 1.4262e-05     | ---TCGGGA-----<br>RCNTNGGGAWNTGTGC    |  |
| E2F         | 2.2690e-05     | TCGGGA--<br>GCGGAAA                   |  |

E2F\_DP

2.2690e-05

TCGGGA--  
GCGGGAAA

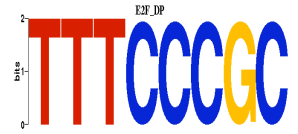

6\_bp\_motif\_pair\_17

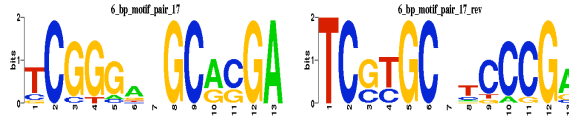

*forward*

*reverse compliment*

| Name             | E value    | Alignment                              | Motif |
|------------------|------------|----------------------------------------|-------|
| ABRECE3ZMRAB28   | 1.3223e-04 | TCGGGANGCACGA<br>-GAGGAGGCGCGT         |       |
| RHERPATEXPA7     | 3.8609e-04 | TCGTGCNTCCCGA<br>WCGTGM-----           |       |
| ABI4_2           | 6.1755e-04 | TCGGGANGCACGA<br>---GRNNGCACCG         |       |
| CCTCGTGTCTCGMGH3 | 8.0763e-04 | --TCGTGCNTCCCGA<br>CCTCGTGTCTC----     |       |
| PUT3             | 1.7706e-03 | ----TCGTGCNTCCCGA<br>NNNNNNTGGCTTCCCG- |       |

6\_bp\_motif\_8

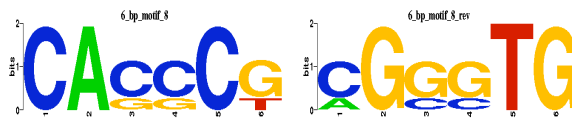

*forward*

*reverse compliment*

| Name    | E value    | Alignment          | Motif |
|---------|------------|--------------------|-------|
| YDR026C | 3.6408e-06 | -CGGGTG<br>CCGGGT- |       |

Stamp Results

09/05/08

Pax-4\_M00378 1.4745e-05

CGGGTG-----  
NGGGTGRNNNN

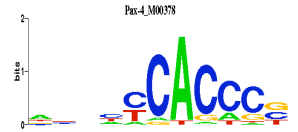

AFT2 1.7513e-05

CGGGTG--  
-GGGTGCN

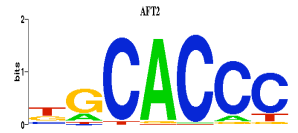

STB2 4.2368e-05

--CACCCG  
NTTACCCG

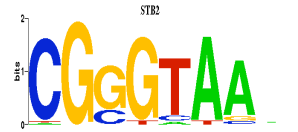

REB1 4.5052e-05

-CGGGTG-  
SCGGGTAA

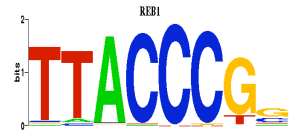

6\_bp\_motif\_pair\_6

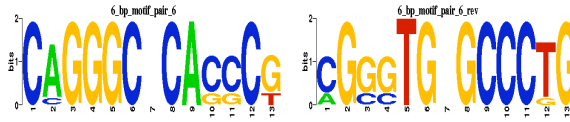

*forward*

*reverse compliment*

*Name*

*E value*

*Alignment*

*Motif*

GCBP2ZMGAPC4 1.9908e-06

CAGGGCNCACCCG  
-CGGGCCCAC---

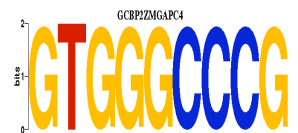

PCF2\_M00948 3.6887e-06

CGGGTNGCCCTG  
---GTGGGNCCN-

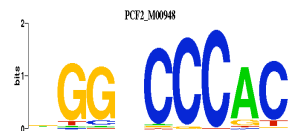

PCF2 2.2189e-05

CGGGTNGCCCTG  
---GTGGGNCCNN

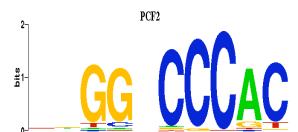

CACD\_M01113 4.7511e-05

CGGGTNGCCCTG  
-GGGYGTG-----

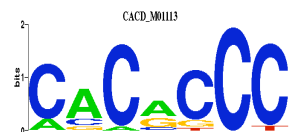

PE3ASPHYA3 6.0001e-05

-----CGGGTNGCCCTG-----  
ACCGGCGCGGATGGGAGAGCCATGGGAGCTG

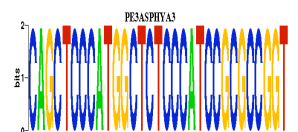

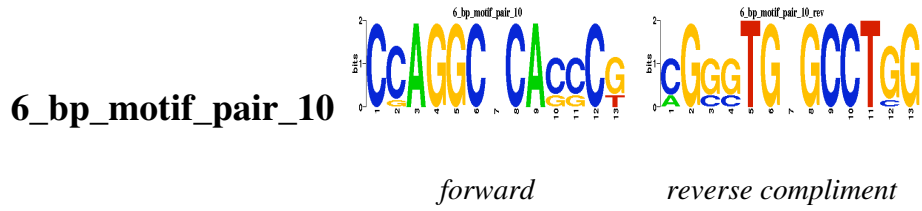

| <i>Name</i>   | <i>E value</i> | <i>Alignment</i>                  | <i>Motif</i> |
|---------------|----------------|-----------------------------------|--------------|
| RNFG2OS       | 6.1781e-06     | --CGGGTGNCCCTGG<br>CCAGTGTGCCCTGG |              |
| GCBP2ZMGAPC4  | 1.6746e-05     | CGGGTGNCCCTGG<br>---GTGGGCCCG--   |              |
| CACD_M01113   | 4.7494e-05     | CGGGTGNCCCTGG<br>-GGYGTG-----     |              |
| Dde_M00304    | 2.2921e-04     | CCAGGCNACCCG<br>----GCTCAGCC--    |              |
| Alfin1_M00479 | 2.5765e-04     | CCAGGCNACCCG--<br>-MNNCCCCACNYNYN |              |

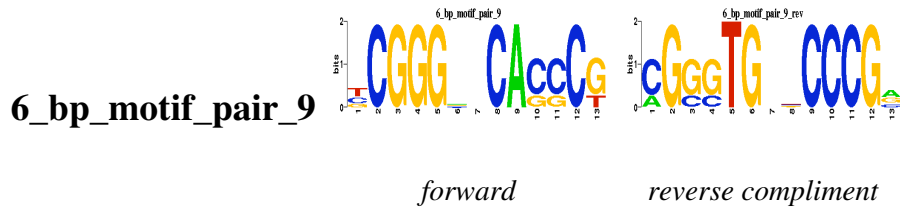

| <i>Name</i> | <i>E value</i> | <i>Alignment</i>               | <i>Motif</i> |
|-------------|----------------|--------------------------------|--------------|
| Zic1_M00448 | 2.9132e-06     | NCGGGNNACCCG<br>----GACNACCC-- |              |
| Zic3_M00450 | 5.5308e-06     | CGGGTGNCCCGN<br>-GGKGNTC-----  |              |



Stamp Results

09/05/08

GCBP2ZMGAPC4 6.0127e-06

NCGGGNNCACCCG  
-CGGGCCCAC---

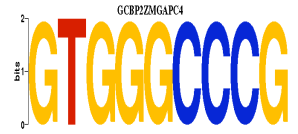

ABI4\_2 7.9049e-06

NCGGGNNCACCCG  
--GRNNGCACCG--

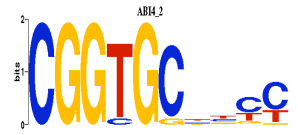

DEAF1\_M01001 8.1681e-06

-----NCGGGNNCACCCG-----  
NNNNNNCGGAAAYNCCCGARNNNG

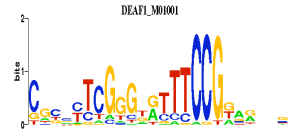

6\_bp\_motif\_12

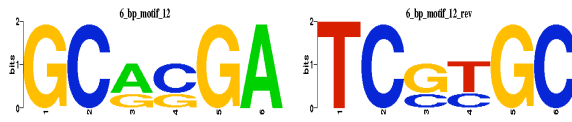

*forward*

*reverse compliment*

*Name*

*E value*

*Alignment*

*Motif*

RHERPATEXPA7 2.1035e-06

TCGTGC  
WCGTGM

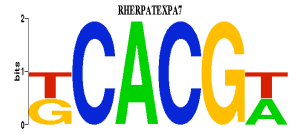

Ttk\_M00009 6.8759e-06

-TCGTGC  
GTCCGTC

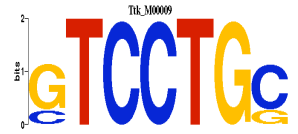

ABF1\_M00399 7.3116e-06

--TCGTGC-----  
NNTCNNGCCACGTGTCCCNNNW

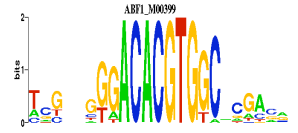

E2F-4-DP-2\_M00739 1.0016e-05

GCACGA-  
GCGSGAA

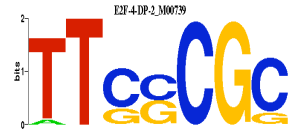

PE2FNTRNR1A 1.2692e-05

GCACGA--  
GCGCGAAT

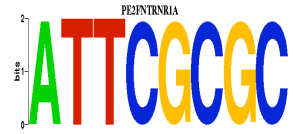

6\_bp\_motif\_pair\_13

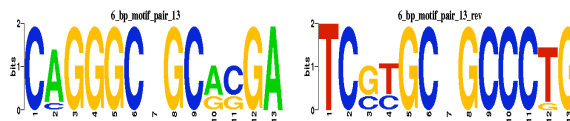

*forward*                      *reverse compliment*

| <i>Name</i> | <i>E value</i> | <i>Alignment</i>               | <i>Motif</i> |
|-------------|----------------|--------------------------------|--------------|
| GRAZMRAB28  | 6.9807e-05     | CAGGGCNGCACGA<br>---GGCGGCATG- |              |
| ERF1        | 2.0428e-04     | CAGGGCNGCACGA<br>---GGCGGC---- |              |
| GCC-box     | 2.0428e-04     | CAGGGCNGCACGA<br>---GGCGGC---- |              |
| GCCCORE     | 2.0428e-04     | CAGGGCNGCACGA<br>---GGCGGC---- |              |
| ERF2_M01057 | 2.4526e-04     | CAGGGCNGCACGA<br>---GGCGGC---- |              |

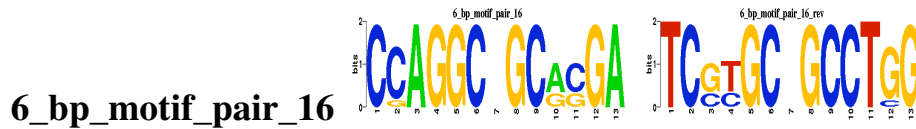

**6\_bp\_motif\_pair\_16**

*forward*                      *reverse compliment*

| <i>Name</i>         | <i>E value</i> | <i>Alignment</i>                              | <i>Motif</i> |
|---------------------|----------------|-----------------------------------------------|--------------|
| ABREMOTIFIIOSRAB16B | 6.2461e-05     | -CCAGGCNGCACGA<br>GCCACGCGGC----              |              |
| GRAZMRAB28          | 6.9807e-05     | CCAGGCNGCACGA<br>---GGCGGCATG-                |              |
| ABF1_M00399         | 1.1227e-04     | --TCGTGCNGCCTGG-----<br>NNTCNGGCCACGTGTCCNNNW |              |
| ERF1                | 2.0428e-04     | CCAGGCNGCACGA<br>---GGCGGC----                |              |

GCC-box

2.0428e-04

CCAGGCNGCACGA  
 ---GGCGGC---

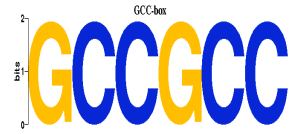

8\_bp\_motif\_3

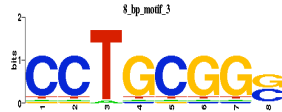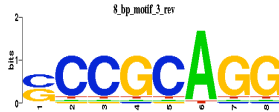

*forward*

*reverse compliment*

| Name        | E value    | Alignment                        | Motif |
|-------------|------------|----------------------------------|-------|
| AP-2_M00800 | 6.8282e-07 | SCCGCAGG-----<br>SCSSCRGGCNRNRNN |       |
| AP-2_M00189 | 2.9052e-06 | -SCCGCAGG--<br>NCCSCNNGGCG       |       |
| INTRONLOWER | 1.7692e-05 | CCTGCGGS<br>CCTGCA--             |       |
| gcm         | 1.9621e-05 | -SCCGCAGG<br>ACCCGCAT-           |       |
| HIF1_M00466 | 2.0641e-05 | SCCGCAGG---<br>NCNSCACGTM        |       |

8\_bp\_motif\_pair\_4

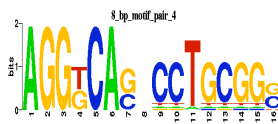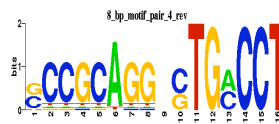

*forward*

*reverse compliment*

| Name         | E value    | Alignment                      | Motif |
|--------------|------------|--------------------------------|-------|
| QELEMENTZM13 | 4.3466e-06 | SCCGCAGGNCTGMCC<br>-----TGACCT |       |

|              |            |                                        |
|--------------|------------|----------------------------------------|
| Ttk_M00009   | 3.0768e-05 | SCCGCAGGNCTGMCCT<br>---GCAGGAC-----    |
| AP-2_M00189  | 2.8997e-04 | AGGKCAGNCCTGCGGS-<br>-----CGCCNGSGGGN  |
| ZBRK1_M01105 | 2.9899e-04 | -SCCGCAGGNCTGMCCT<br>GGSMGCAGNNNTTT--- |
| WBOXNTCHN48  | 3.6331e-04 | AGGKCAGNCCTGCGGS<br>-RGTCAG-----       |

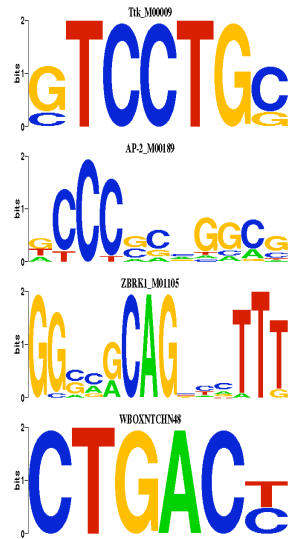

8\_bp\_motif\_pair\_3

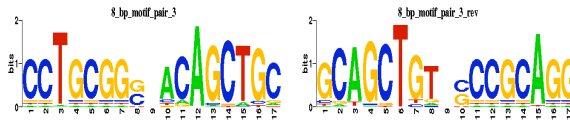

*forward*

*reverse compliment*

| Name            | E value    | Alignment                              |
|-----------------|------------|----------------------------------------|
| myogenin_M00712 | 6.7044e-07 | CCTGCGGSNACAGCTGC<br>-----CASCTGN      |
| AP-4_M00927     | 1.7800e-06 | GCAGCTGTNSCCGCAGG<br>RCAGCTGN-----     |
| LBP-1_M00644    | 4.1953e-06 | GCAGCTGTNSCCGCAGG<br>SCAGCN-----       |
| Adf-1_M00171    | 8.5332e-06 | CCTGCGGSNACAGCTGC<br>NMNGCNRCRGRGCG--  |
| Myf             | 8.6476e-06 | GCAGCTGTNSCCGCAGG<br>-CAGCAGYTGCYK---- |

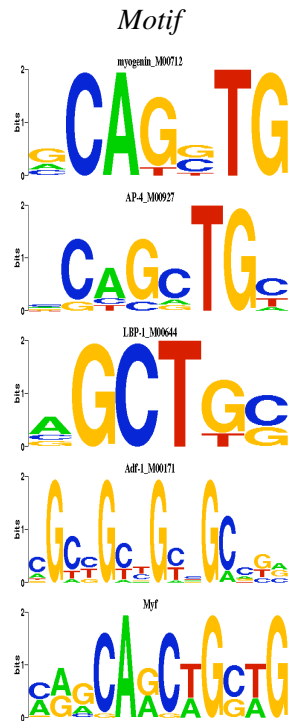

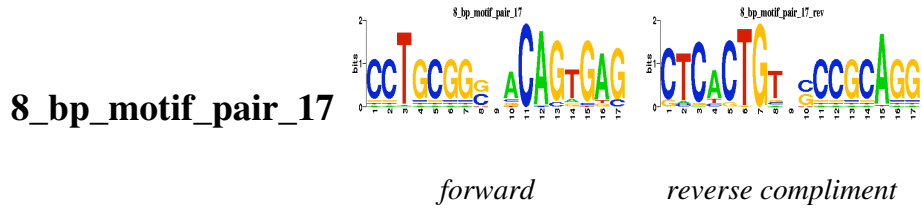

| <i>Name</i>       | <i>E value</i> | <i>Alignment</i>                         | <i>Motif</i> |
|-------------------|----------------|------------------------------------------|--------------|
| SORLIP5           | 2.1849e-05     | CTCACTGTNSCCGCAGG<br>CTCACTC-----        |              |
| SORLIP5AT         | 2.1849e-05     | CTCACTGTNSCCGCAGG<br>CTCACTC-----        |              |
| AhR_M00139        | 5.3848e-05     | -CTCACTGTNSCCGCAGG<br>TSTCACGCNASNYNGRG- |              |
| Adf-1_M00171      | 7.0533e-05     | CCTGCCGGSNACAGTGAG<br>NMNGCNRRCRGCRGCG-- |              |
| E2F-1-DP-2_M00737 | 9.3779e-05     | CCTGCCGGSNACAGTGAG<br>---GCCGGAA-----    |              |

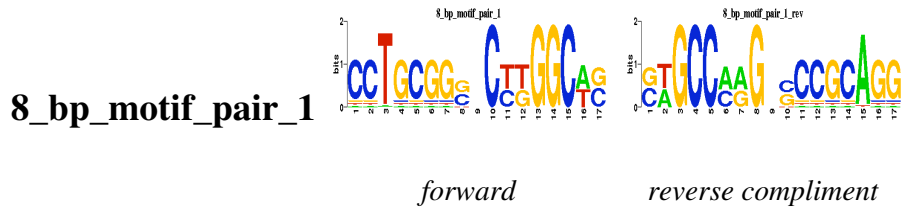

| <i>Name</i> | <i>E value</i> | <i>Alignment</i>                        | <i>Motif</i> |
|-------------|----------------|-----------------------------------------|--------------|
| RIM101      | 5.3733e-06     | SWGCCMRGNSCCGCAGG<br>-TGCCAAG-----      |              |
| GBOX10NT    | 2.1325e-04     | CCTGCCGGSNCYKGGCWS<br>-----GGCACGTGGC-- |              |

|                 |            |                                        |
|-----------------|------------|----------------------------------------|
| ERE             | 2.2159e-04 | CCTGCGGSNCYKGGCWS<br>--GGCGGCTCTTA---- |
| EREGCC          | 2.2159e-04 | CCTGCGGSNCYKGGCWS<br>--GGCGGCTCTTA---- |
| AMMORESVDCRNIA1 | 2.3845e-04 | SWGCCMRGNSCCGCAGG<br>---CCCGGGGCC----- |

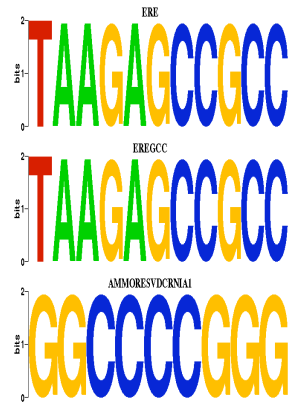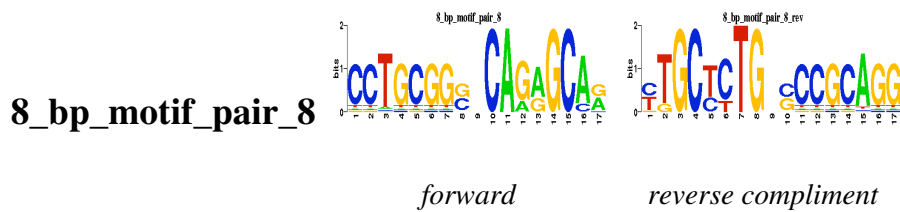

| Name         | E value    | Alignment                                     | Motif        |
|--------------|------------|-----------------------------------------------|--------------|
| SKN7         | 8.3870e-05 | CCTGCGGSNCAGAGCAR<br>-----GGSCYRGN-----       | SKN7         |
| LF-A1_M00646 | 2.2625e-04 | YTGCTCTGNSCCGCAGG<br>-----YWGASCC-----        | LF-A1_M00646 |
| INTRONLOWER  | 4.9523e-04 | CCTGCGGSNCAGAGCAR<br>CCTGCA-----              | INTRONLOWER  |
| GAL4         | 9.8797e-04 | CCTGCGGSNCAGAGCAR-----<br>---NCGGNANTNYNNTCCG | GAL4         |
| gcm          | 1.4741e-03 | YTGCTCTGNSCCGCAGG<br>-----ACCCGCAT-           | gcm          |

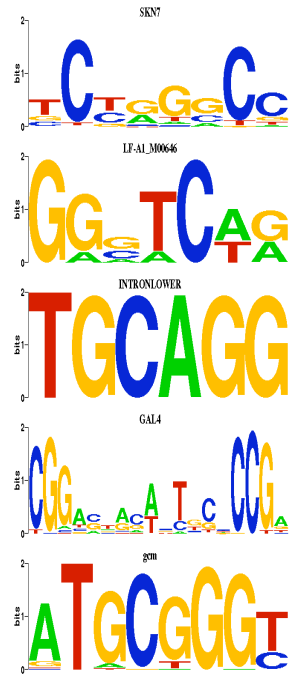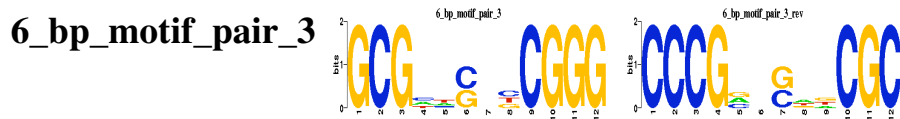

*forward* *reverse compliment*

*Name* *E value* *Alignment* *Motif*

|             |            |                                            |
|-------------|------------|--------------------------------------------|
| Mad         | 4.7888e-04 | GCGNNSNNCGGG<br>GCGNCGNCNS--               |
| NRSF_M00256 | 1.1320e-03 | -GCGNNSNNCGGG-----<br>GSYGCTGTCCGTGGTGCTGA |
| NRSE_M00325 | 1.5421e-03 | -GCGNNSNNCGGG-----<br>GGCRCTCTCCGNGGTGCTGA |
| SNF1        | 2.3653e-03 | -----GCGNNSNNCGGG<br>CCGRGTTTCGATYCYCGG-   |
| YDR026C     | 3.3860e-03 | GCGNNSNNCGGG-<br>-----CCGGGT               |

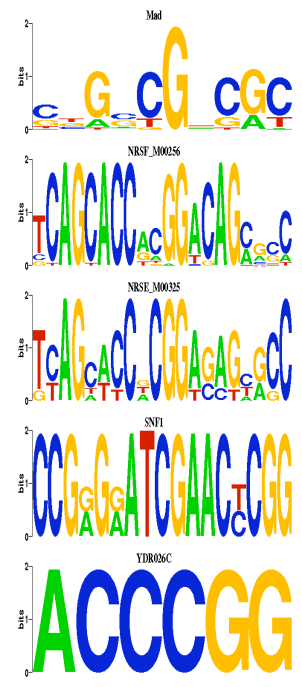

**6\_bp\_motif\_pair\_7**

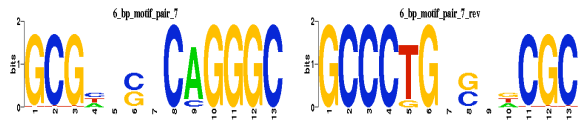

*forward* *reverse compliment*

*Name* *E value* *Alignment* *Motif*

|         |            |                                             |
|---------|------------|---------------------------------------------|
| Mad     | 5.3676e-06 | GCGNNSNCAGGGC<br>GCGNCGNCNS---              |
| SAV1329 | 2.0532e-04 | GCCCTGNSNNCGC-----<br>-TACTGTGAGCGCTCACAGTN |
| RFX1    | 2.3204e-03 | GCGNNSNCAGGGC---<br>--GTTGYCATGGNAAC        |
| Roaz    | 3.3222e-03 | ---GCCCTGNSNNCGC<br>GNMMCCYTRGGKKSC-        |

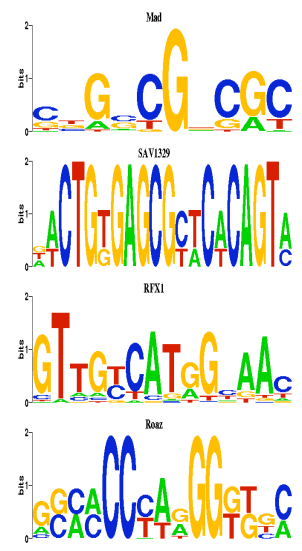

PE3ASPHYA3 5.0098e-03

-----GCCCTGNSNNCGC  
ACCGGCGCGGATGGGAGAGCCATGGGAGCTG

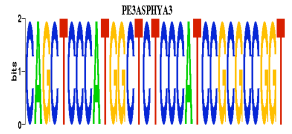

**6\_bp\_motif\_pair\_5**

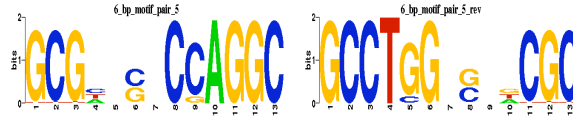

*forward*

*reverse compliment*

| Name         | E value    | Alignment                                      | Motif |
|--------------|------------|------------------------------------------------|-------|
| REST         | 1.6156e-04 | -----GCCTGGNSNNCGC<br>TCAGCACCWNGGACAGCNC      |       |
| CGTGTSPHZMC1 | 3.3613e-04 | --GCCTGGNSNNCGC--<br>ATGCATGGACGACACG          |       |
| Mad          | 1.0096e-03 | GCGNNSNCCAGGC<br>GCGNCGNCNS---                 |       |
| MarR_ec      | 1.3902e-03 | -----GCCTGGNSNNCGC--<br>ATTACTTGCCNGGGCAACCATT |       |
| AP-2_M00915  | 1.7353e-03 | GCGNNSNCCAGGC--<br>--NNNCCNCNGGCN              |       |

**6\_bp\_motif\_10**

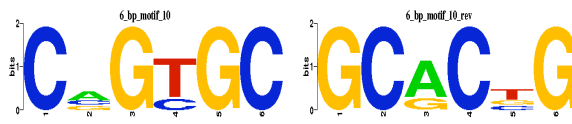

*forward*

*reverse compliment*

| Name | E value    | Alignment                            | Motif |
|------|------------|--------------------------------------|-------|
| Pax5 | 3.3113e-05 | ---GCACNG-----<br>NGNNNNNYGNWGCGRRCR |       |



Stamp Results

09/05/08

|             |            |                          |                                                                                     |
|-------------|------------|--------------------------|-------------------------------------------------------------------------------------|
| ABI4_M00958 | 6.9826e-05 | ---CNGTGC-<br>GGGCGGTGCN |  |
| ABI4_2      | 8.3601e-05 | ----GCACNG<br>GRNNGCACCG |  |
| ABI4        | 1.3811e-04 | ----GCACNG<br>NGNNGCRSCG |  |
| D4GMAUX28   | 1.8679e-04 | ---GCACNG<br>ACAGCACTA   |  |

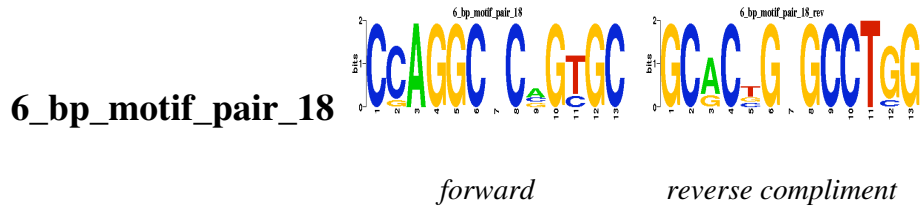

| Name            | E value    | Alignment                                         | Motif                                                                                 |
|-----------------|------------|---------------------------------------------------|---------------------------------------------------------------------------------------|
| Pax-5_M00143    | 1.3153e-05 | -----GCACNGGCCTGG<br>NNNSYSGCYMYNCWNCNNTGMNYNNG   | 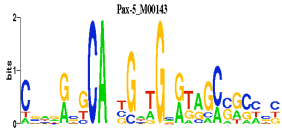 |
| myogenin_M00056 | 6.7600e-05 | -----GCACNGGCCTGG-<br>ASCTGTNNNNTTGGCACNSNGCCARNN |  |
| CDC5_M00361     | 1.0980e-04 | -GCACNGGCCTGG<br>NSCGTGAGS----                    |  |
| CDC5            | 3.9320e-04 | -GCACNGGCCTGG<br>NSCGTGAGSN---                    |  |
| SKN7            | 4.5094e-04 | CCAGGCNCNGTGC<br>---GGSCYRGN--                    |  |

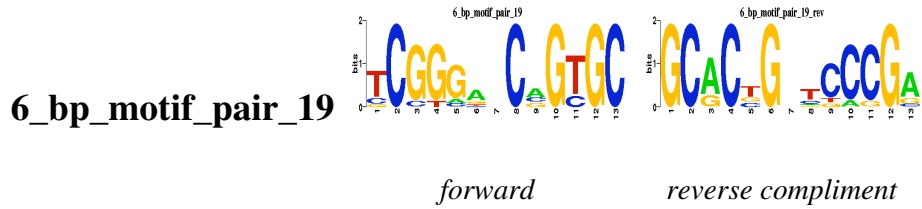

| <i>Name</i> | <i>E value</i> | <i>Alignment</i>                             |
|-------------|----------------|----------------------------------------------|
| ANT         | 1.8102e-09     | GCACNGNTCCCGA---<br>GCACANWTCCCNANGY         |
| ANT_M00501  | 8.1829e-06     | GCACNGNTCCCGA--<br>--ACANWTCCCRAKG           |
| IXR1        | 2.8611e-04     | GCACNGNTCCCGA---<br>-CACCGCTTMCGGYTT         |
| ScrR_VC     | 6.5135e-04     | --TCGGGANCNGTGC-----<br>TTTCGGGAACGTTNNCAATT |
| MalR_Cbu    | 7.9497e-04     | --TCGGGANCNGTGC-----<br>TTTCGGTAACGRTACCAWWN |

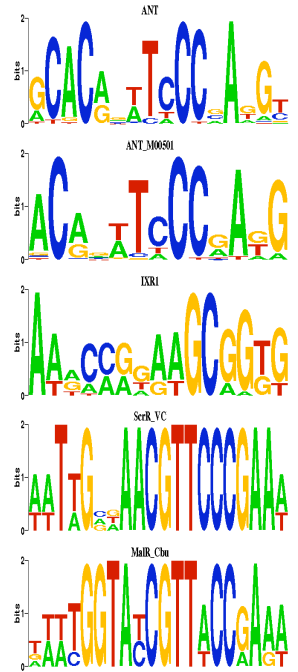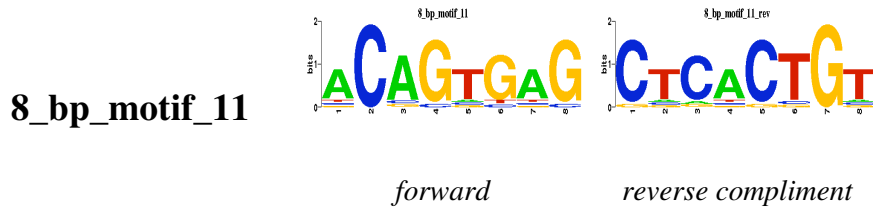

| <i>Name</i> | <i>E value</i> | <i>Alignment</i>                     |
|-------------|----------------|--------------------------------------|
| C1GMAUX28   | 5.9954e-11     | ---CTCACTGT-----<br>TAACTCACTGTTTTCA |
| SORLIP5     | 1.6201e-07     | CTCACTGT<br>CTCACTC-                 |

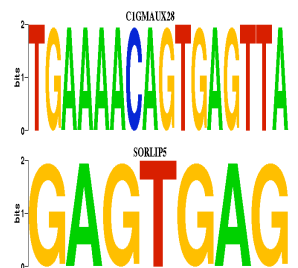

|             |            |                                        |
|-------------|------------|----------------------------------------|
| SORLIP5AT   | 1.6201e-07 | CTCACTGT<br>CTCACTC-                   |
| SUP_oneSite | 5.1999e-06 | CTCACTGT-<br>GACACTGTC                 |
| ER_M00191   | 7.1287e-06 | -----ACAGTGAG---<br>NNNGGTCANNNNNNNYNN |

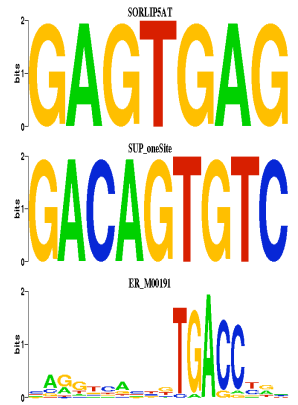

10\_bp\_motif\_1

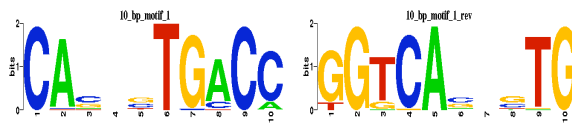

*forward*                      *reverse compliment*

| Name                       | E value    | Alignment                                      | Motif                      |
|----------------------------|------------|------------------------------------------------|----------------------------|
| PPARgamma-RXRalpha,_M00515 | 3.4102e-11 | -----CASNNTGACC-----<br>AANTAGGTCACNGTGACCTAST | PPARgamma-RXRalpha,_M00515 |
| ER_M00191                  | 4.8677e-11 | ---GGTCANNSTG-----<br>NNNGGTCANNNNNNNYNN       | ER_M00191                  |
| PPARG                      | 5.5354e-11 | -----CASNNTGACC-----<br>ANTRGGTCACNNTGACCTAN   | PPARG                      |
| ESR1                       | 2.1967e-10 | --GGTCANNSTG-----<br>NNGGYCANNGTGACCTNN        | ESR1                       |
| prd-PD                     | 1.2273e-06 | ----CASNNTGACC-----<br>NNTCAACCGTGACGANN       | prd-PD                     |

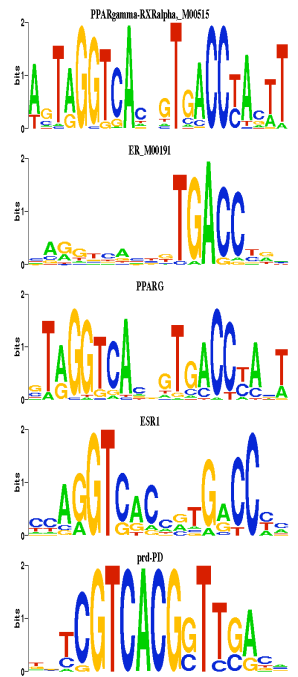

12\_bp\_motif\_1

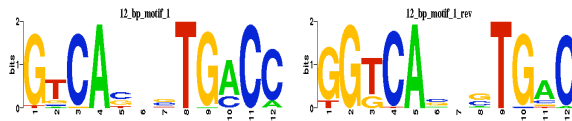

|                           | <i>forward</i> | <i>reverse compliment</i>                        |                                                                                     |
|---------------------------|----------------|--------------------------------------------------|-------------------------------------------------------------------------------------|
| <i>Name</i>               | <i>E value</i> | <i>Alignment</i>                                 | <i>Motif</i>                                                                        |
| ER_M00191                 | 4.6629e-15     | ---GGTCANNNTGAC---<br>NNNGGTCANNNNNNNNYNN        | 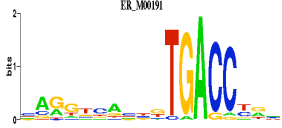 |
| PPARgamma-RXRalpha_M00515 | 7.9381e-14     | -----GTCANNNTGACC-----<br>AANTAGGTCACNGTGACCTAST |  |
| PPARG                     | 2.2649e-13     | ---GGTCANNNTGAC-----<br>NTAGGTCANNGTGACCYANT     |  |
| ESR1                      | 3.2419e-13     | ----GTCANNNTGACC--<br>NNAGGTCACNNTGRCCNN         |  |
| RNFG2OS                   | 1.6051e-04     | ----GGTCANNNTGAC<br>CCAGGGGCACACTGG-             |  |

**10\_bp\_motif\_pair\_13**

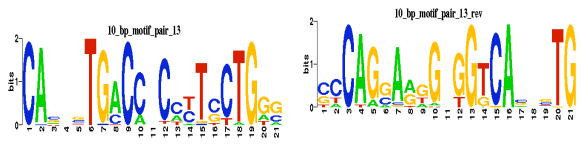

|               | <i>forward</i> | <i>reverse compliment</i>                           |                                                                                       |
|---------------|----------------|-----------------------------------------------------|---------------------------------------------------------------------------------------|
| <i>Name</i>   | <i>E value</i> | <i>Alignment</i>                                    | <i>Motif</i>                                                                          |
| NERF1a_M00531 | 5.0020e-08     | CANNNTGACCNCMYTSTGGS<br>----SNNASNYRCTTCCTGNY       |  |
| JERECRSTR     | 2.9610e-05     | CANNNTGACCNCMYTSTGGS---<br>CTCTTAGACCGCCTTCTTTGAAAG |  |
| VDR_M00444    | 3.0295e-05     | CANNNTGACCNCMYTSTGGS<br>----TSWCCYYNYTNMCC--        |  |

Zic1\_M00448

4.5619e-05

SCCAGSARKNGGTCANNNTG  
-----GGTNGTC-----

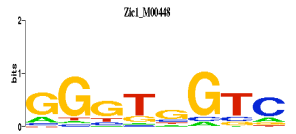

PPARgamma-RXRalpha,\_M00515 7.1147e-05

-----CANNNTGACCNCMYTSC TGGS  
AANTAGGTACNGTGACCTAST-----

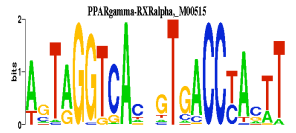

10\_bp\_motif\_pair\_20

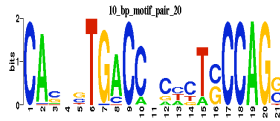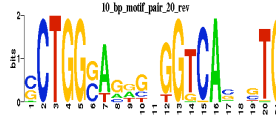

*forward*

*reverse compliment*

| Name          | E value    | Alignment                                      | Motif |
|---------------|------------|------------------------------------------------|-------|
| VDR_M00444    | 1.2588e-05 | CASNNTGACCNCNYTSCCAGS<br>-----TSWCCYYNYTNMCC-- |       |
| ZNF219_M01122 | 1.4261e-05 | SCTGGSARNGNGGTCANNSTG<br>---GGNGGGGGGN-----    |       |
| MAZ_M00649    | 2.0848e-05 | CASNNTGACCNCNYTSCCAGS<br>-----CCCTCCC---       |       |
| Zic1_M00448   | 3.3455e-05 | CASNNTGACCNCNYTSCCAGS<br>-----GACNACCC-----    |       |
| Zic3_M00450   | 5.2369e-05 | SCTGGSARNGNGGTCANNSTG<br>-----GGGKGNTC-----    |       |

6\_bp\_motif\_3

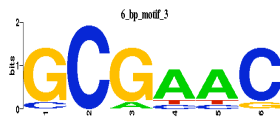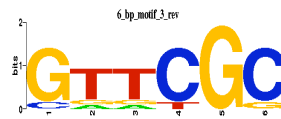

*forward*

*reverse compliment*

| <i>Name</i>      | <i>E value</i> | <i>Alignment</i>        | <i>Motif</i> |
|------------------|----------------|-------------------------|--------------|
| AMMORESIVDCRNIA1 | 9.1148e-06     | --GTTTCGC<br>AAGTTTCG-- |              |
| PE2FNTRNR1A      | 2.5012e-05     | --GCGAAC<br>GCGCGAAT    |              |
| E2F_M00425       | 2.9674e-05     | GTTTCGC--<br>-TTCGCGC   |              |
| STB1             | 3.5856e-05     | -GTTTCGC-<br>TTTTTCGCG  |              |
| E2F_M00427       | 1.3905e-04     | --GCGAAC<br>SCGCSAA--   |              |

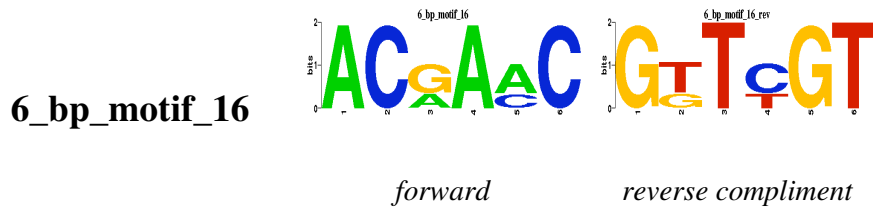

| <i>Name</i>      | <i>E value</i> | <i>Alignment</i>             | <i>Motif</i> |
|------------------|----------------|------------------------------|--------------|
| AACACOREOSGLUB1  | 4.4421e-06     | GTTTCGT-<br>GTTTGT           |              |
| AMMORESIVDCRNIA1 | 4.0948e-05     | --GTTTCGT<br>AAGTTTCG--      |              |
| CELLCYCLESC      | 1.0297e-04     | -GTTTCGT-<br>TTTTTCGTG       |              |
| GLUTAACAOS       | 1.2081e-04     | -----GTTTCGT-<br>ATAGAGTTTGT |              |

HFH4\_M00742

1.3377e-04

---ACGAAC---  
TAAACAAACAMW

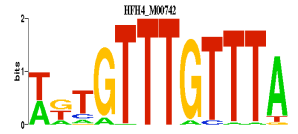

**6\_bp\_motif\_13**

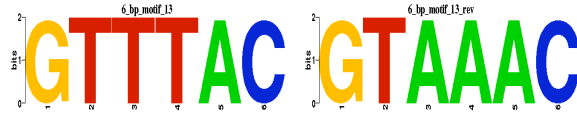

*forward*

*reverse compliment*

| Name         | E value    | Alignment                      |
|--------------|------------|--------------------------------|
| FOXD1        | 3.8041e-09 | --GTTTAC<br>NTGTTTAC           |
| FKH1         | 1.0861e-07 | --GTTTAC----<br>TTGTTTACNNNN   |
| FOXO1_M00474 | 1.2142e-07 | ---GTAAAC----<br>NNGTAAACAANN  |
| FOXO3_M00477 | 1.2159e-07 | ---GTAAAC----<br>WANGTAAACAANN |
| FOXO4_M00476 | 1.3384e-07 | ---GTAAAC----<br>NANGTAAACAACN |

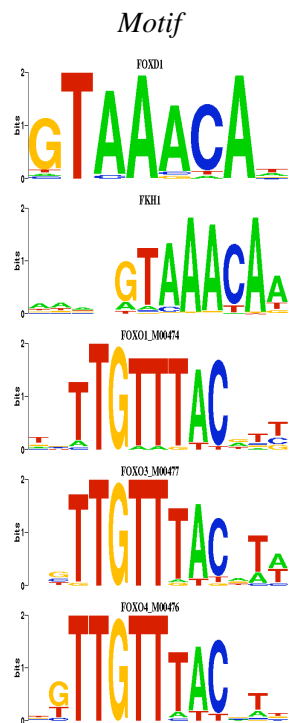

**10\_bp\_motif\_2**

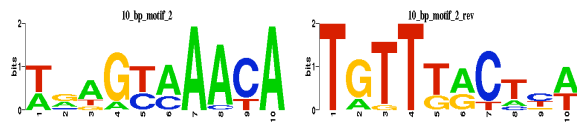

*forward*

*reverse compliment*

| Name           | E value    | Alignment                          |
|----------------|------------|------------------------------------|
| Freac-4_M00292 | 2.9218e-12 | ----TGTTTRCTYA-<br>NNNNTGTTTACWTWR |

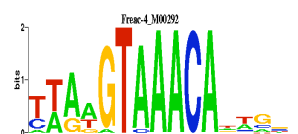

HNF3beta\_M00131 2.9936e-11

----TGTTTRCTYA  
GNANTRITTRYTTW

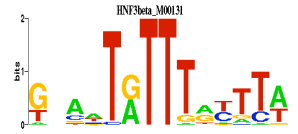

FOX\_M00809 4.5112e-10

TRAGYAAACA--  
WAAAYAAACANT

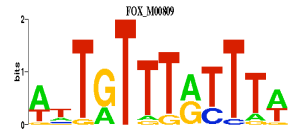

HNF3alpha\_M00724 3.7618e-09

-TRAGYAAACA  
NWRARCAAAY-

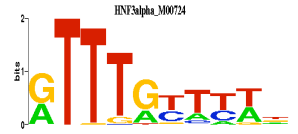

Foxa2 1.4741e-08

TRAGYAAACA---  
-AARYAAATANTN

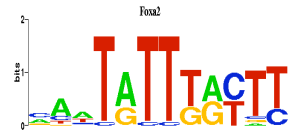

12\_bp\_motif\_2

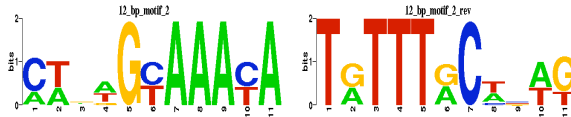

*forward*

*reverse compliment*

*Name*

*E value*

*Alignment*

*Motif*

Freac-4\_M00292 1.1626e-09

----TRTTTRCWNWG  
NNNNTGTTTACWTWR

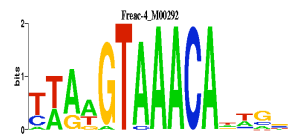

HNF3beta\_M00131 1.2572e-09

----TRTTTRCWNWG  
GNANTRITTRYTTW-

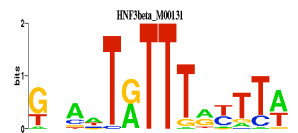

D3GMAUX28 1.2239e-08

TRTTTRCWNWG  
TATTGCTTAA

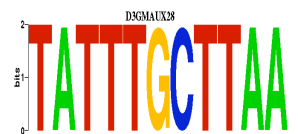

HNF3alpha\_M00724 1.2731e-08

CWNWGYYAAYA  
NWRARCAAAY-

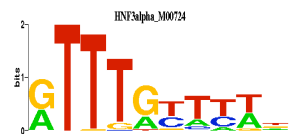

FOX\_M00809 4.4116e-08

CWNWGYYAAYA--  
-WAAAYAAACANT

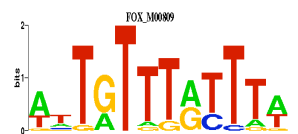



**8\_bp\_motif\_2**

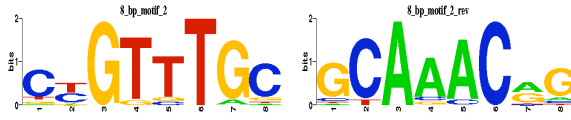

*forward*

*reverse compliment*

| Name             | E value    | Alignment                                  | Motif |
|------------------|------------|--------------------------------------------|-------|
| Sn_M00044        | 2.6878e-07 | ----CYGTTTGC--<br>NNANNTGNTNNA             |       |
| DBP_M00624       | 9.2554e-07 | CYGTTTGC<br>--NWNATC                       |       |
| 2SSEEDPROTBANAPA | 4.0844e-06 | CYGTTTGC<br>GIGTTTGC--                     |       |
| PurR             | 6.3871e-06 | -----CYGTTTGC--<br>AMGCAAACGTTTGCCT        |       |
| MalR_ST          | 1.3569e-05 | -----CYGTTTGC-----<br>TTATGCAANCGNTTGCCKWA |       |

**8\_bp\_motif\_8**

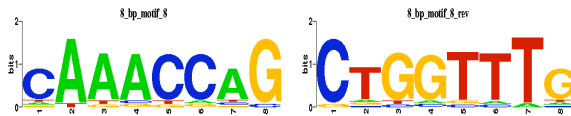

*forward*

*reverse compliment*

| Name                          | E value    | Alignment                      | Motif |
|-------------------------------|------------|--------------------------------|-------|
| Grainyhead-Elf-1-NTF-1_M00951 | 8.6018e-11 | CAAACCAG<br>-AAACCRG           |       |
| CP2-LBP-1c-LSF_M00947         | 2.9219e-09 | -----CAAACCAG<br>CNRGNNNANCCAG |       |

|            |            |                          |  |
|------------|------------|--------------------------|--|
| MYB1AT     | 1.1906e-07 | CAAACCAG<br>-WAACCA-     |  |
| grh        | 3.2880e-07 | --CAAACCAG<br>RNNRAACCAG |  |
| CP2_M00072 | 8.2667e-07 | CTGGTTG--<br>CTGGKTNGNG  |  |

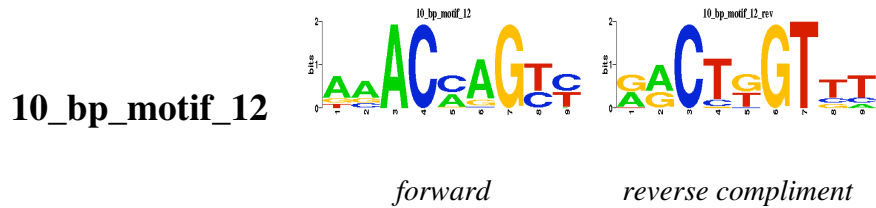

| Name                          | E value    | Alignment                    | Motif |
|-------------------------------|------------|------------------------------|-------|
| Grainyhead-Elf-1-NTF-1_M00951 | 2.6976e-09 | AAACMAGTY<br>AAACCRG--       |       |
| MYB2                          | 1.9794e-06 | AAACMAGTY-<br>-AACSAGTTA     |       |
| grh                           | 2.5118e-06 | ---AAACMAGTY<br>RNNRAACCAG-- |       |
| MYB1AT                        | 4.0985e-06 | RACTKGTTT<br>---TGGTTW       |       |
| ACE2                          | 4.3820e-06 | RACTKGTTT<br>TRCKGGTT-       |       |

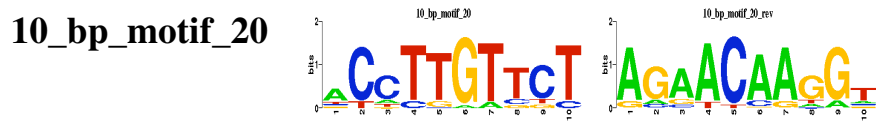

|                           | <i>forward</i> | <i>reverse compliment</i>             |                                                                                     |
|---------------------------|----------------|---------------------------------------|-------------------------------------------------------------------------------------|
| <i>Name</i>               | <i>E value</i> | <i>Alignment</i>                      | <i>Motif</i>                                                                        |
| RORA_1                    | 1.2075e-06     | --ACCTTGGTCT<br>TGACCTNNWW--          |  |
| SF1_M00727                | 2.5131e-06     | AGAACAAGGT-<br>----CAAGGTC            |  |
| GR_M00921                 | 3.3177e-06     | ACCTTGGTCT<br>---NIGTNCT              |  |
| PPARalpha-RXRalpha_M00242 | 3.5748e-06     | -----ACCTTGGTCT<br>TGACCTTTGNCTAGWTYW |  |
| RORalpha1_M00156          | 1.0071e-05     | ---ACCTTGGTCT<br>NTGACCTNNWWN-        |  |

**6\_bp\_motif\_9**

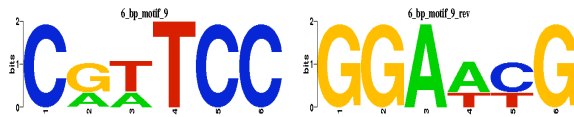

|              | <i>forward</i> | <i>reverse compliment</i>                |                                                                                       |
|--------------|----------------|------------------------------------------|---------------------------------------------------------------------------------------|
| <i>Name</i>  | <i>E value</i> | <i>Alignment</i>                         | <i>Motif</i>                                                                          |
| shn-ZFP1     | 4.7754e-07     | -----CGTTCC-<br>GGGAACGWTCCC             |  |
| STB4         | 3.1813e-06     | -CGTTCC--<br>TCGNNCGA                    |  |
| Pax-1_M00326 | 3.8134e-06     | -----GGAACG<br>ATATCTAGAGCGGAACG         |  |
| AGR_pAT_567  | 5.1115e-06     | -----CGTTCC-----<br>TARYGGGAACGTTCCCRTWA |  |

ScrR\_VC

5.1115e-06

-----GGAACG-----  
TTTCGGGAACGTTNNCAATT

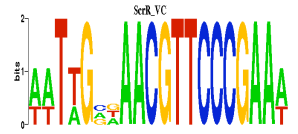

8\_bp\_motif\_6

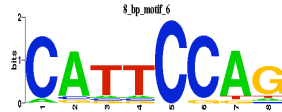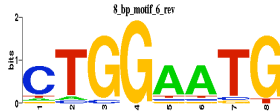

*forward*

*reverse compliment*

*Name*

*E value*

*Alignment*

*Motif*

Opaque-2\_M00010

2.1242e-07

-----CTGGAATG  
YATCTACGTGGAATG

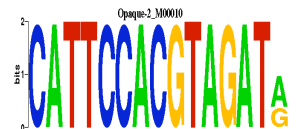

TEAD1

8.8025e-07

--CATTCCAG--  
YACATTCCWSNG

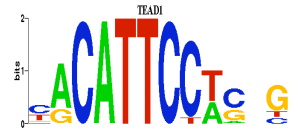

STAT5B\_M00459

1.2865e-05

-CATTCCAG-----  
NRNTTCCNGGAAWN

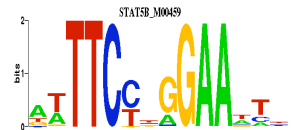

TE2F2NTPCNA

2.0984e-05

-CTGGAATG  
GCGGGAAT-

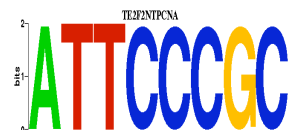

SV40COREENHAN

4.8024e-05

CATTCCAG  
CNWWCCAC

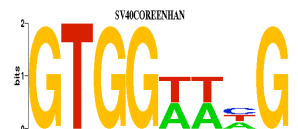

8\_bp\_motif\_pair\_20

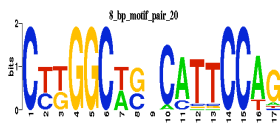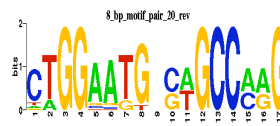

*forward*

*reverse compliment*

*Name*

*E value*

*Alignment*

*Motif*

RIM101

1.9865e-05

CYKGGCWSNCATTCCAG  
CTTGGCA-----

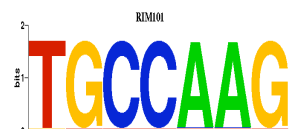

|              |            |                                               |
|--------------|------------|-----------------------------------------------|
| SMb20667     | 1.2671e-04 | --CTGGAATGNSWGCCMRG--<br>GGTTGGCAGCGCTGCCAAAA |
| TEF-1_M00704 | 8.7765e-04 | CYKGGCWSNCATTCCAG<br>-----CATYY---            |
| TEAD1        | 2.1613e-03 | CYKGGCWSNCATTCCAG--<br>-----YACATTCCWSNG      |
| TE2F2NTPCNA  | 2.2611e-03 | -CTGGAATGNSWGCCMRG<br>GCGGGAAT-----           |

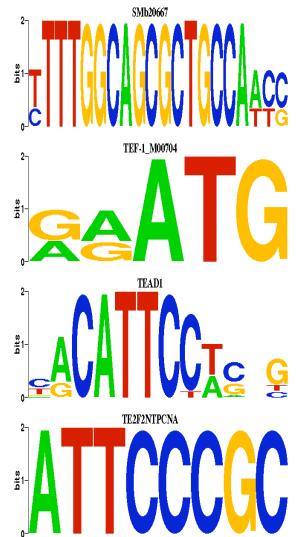

**10\_bp\_motif\_16**

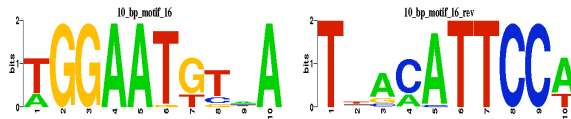

*forward*

*reverse compliment*

| <i>Name</i> | <i>E value</i> | <i>Alignment</i>                        |
|-------------|----------------|-----------------------------------------|
| TEAD1       | 9.1279e-08     | TNACATTCCA---<br>-YACATTCCWSNG          |
| AbaA_M00027 | 1.4757e-06     | ---TNACATTCCA-----<br>NNNYNCATTCCNNNNNN |
| sd          | 5.8909e-06     | ---TGGAATGTNA<br>NYNNNRAATKWN-          |
| hu          | 9.4354e-06     | --TNACATTCCA-----<br>TATTCATNCCATNAG    |
| CARg2       | 2.5397e-05     | -TNACATTCCA-----<br>CTTACCTTTCATGGATTA  |

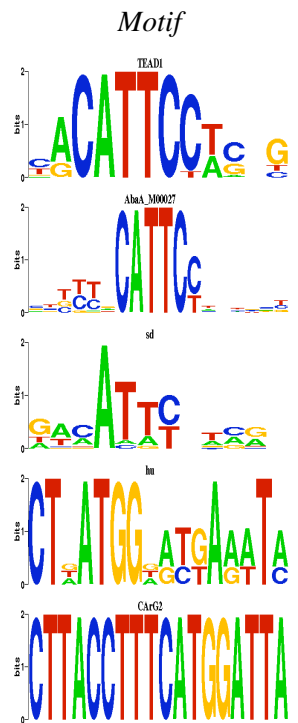

12\_bp\_motif\_16

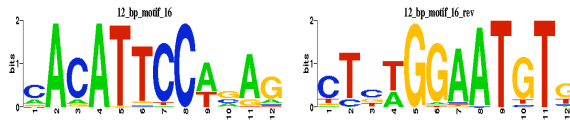

*forward*

*reverse compliment*

| Name       | E value    | Alignment                        |
|------------|------------|----------------------------------|
| TEAD1      | 2.2411e-08 | CTNTGGAAATGTG<br>CNSWGGAAATGTR   |
| sd         | 8.8889e-08 | CTNTGGAAATGTG<br>NYNNNRAATKWN    |
| p120       | 7.4549e-05 | CACATTCCANAG<br>AACATTCAATAG     |
| HSF_M00169 | 1.2957e-04 | -CACATTCCANAG-<br>GAANNTTCNNGAAN |
| AtMYC2     | 2.1681e-04 | CTNTGGAAATGTG<br>-----CATGTG     |

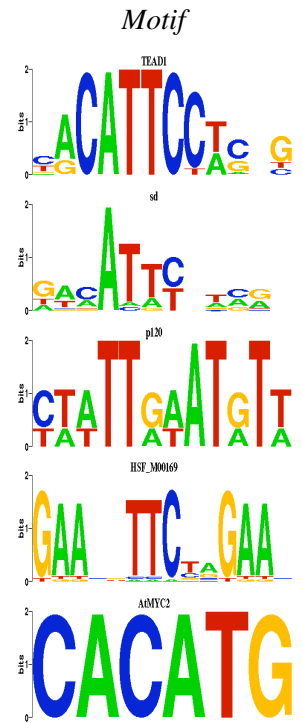

6\_bp\_motif\_19

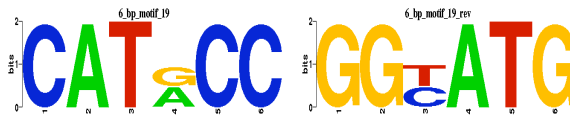

*forward*

*reverse compliment*

| Name       | E value    | Alignment                             |
|------------|------------|---------------------------------------|
| GRAZMRAB28 | 4.9478e-07 | ---GGYATG<br>GGCGGCATG                |
| p53_M00034 | 1.1283e-05 | ---CATRCC-----<br>RGACATGCCCGGGCATGTC |

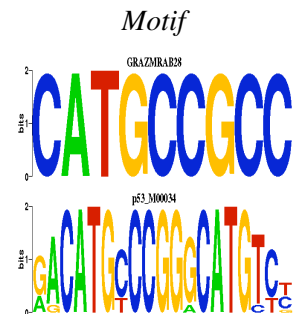

|      |            |                                             |                                                                                     |
|------|------------|---------------------------------------------|-------------------------------------------------------------------------------------|
| EIL1 | 2.3770e-05 | -----CATRCC-----<br>TTCAAGATACATGCCCCCTTGAA | 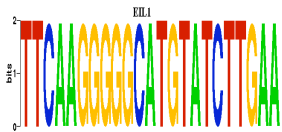 |
| EIL2 | 2.3770e-05 | -----CATRCC-----<br>TTCAAGATACATGCCCCCTTGAA |  |
| EIL3 | 2.3770e-05 | -----CATRCC-----<br>TTCAAGATACATGCCCCCTTGAA |  |

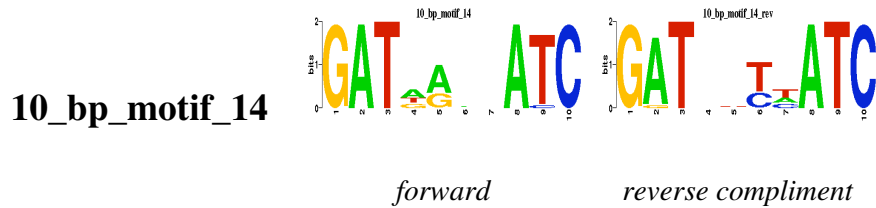

| <i>Name</i>  | <i>E value</i> | <i>Alignment</i>             | <i>Motif</i>                                                                          |
|--------------|----------------|------------------------------|---------------------------------------------------------------------------------------|
| BOX1PSGS2    | 2.3721e-08     | GATNANNATC--<br>-ATAGAAATCAA |   |
| AT1BOX       | 9.0339e-07     | GATNANNATC--<br>AATAAAAATATT |  |
| CCA1         | 3.1679e-06     | GATNANNATC-<br>---AAMAATCT   |  |
| CCA1ATLHCB1  | 3.1679e-06     | GATNANNATC-<br>---AAMAATCT   |  |
| Abd-B_M01094 | 8.1643e-06     | GATNNTNATC<br>---TTTTAT-     |  |

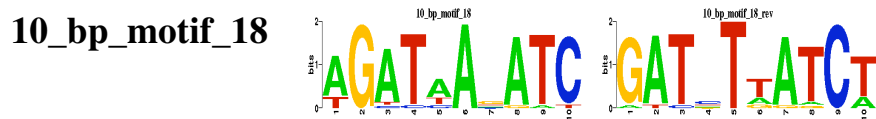

|               | <i>forward</i> | <i>reverse compliment</i>          |                                                                                     |
|---------------|----------------|------------------------------------|-------------------------------------------------------------------------------------|
| <i>Name</i>   | <i>E value</i> | <i>Alignment</i>                   | <i>Motif</i>                                                                        |
| GLN3          | 9.7500e-13     | GATNTTATCT<br>NATCTTATCN           |  |
| Evi-1_M00078  | 5.2360e-11     | -GATNTTATCT----<br>TTATCTTATCTTRTC |  |
| Evi1          | 7.2086e-11     | ---GATNTTATCT-<br>NNTTATCTTRICTN   |  |
| GATA-3_M00350 | 3.2082e-10     | GATNTTATCT-<br>--TNTTATCTY         |  |
| GATA-2_M00349 | 3.2953e-10     | GATNTTATCT-<br>--TNTTATCTS         |  |

Sequence logo generation powered by [weblogo](#)  
 STAMP is written by Shaun Mahony
