# Supplementary material
Source: PubMed Central journal article supplement (PMC2852354)
Supplement: me.2009-0499_4.pdf [file me.2009-0499_4.pdf]

|     | SRC3    |   |   |   |   |   | ER $\alpha$ |          | Gene Symbol        | Gene ID | SRC3 |     |     |     |    |     | ER $\alpha$ |    |    |     |    |    |     |    |  |
|-----|---------|---|---|---|---|---|-------------|----------|--------------------|---------|------|-----|-----|-----|----|-----|-------------|----|----|-----|----|----|-----|----|--|
|     | E2      |   |   | C |   |   | V           |          |                    |         | E2   |     | V   |     | E2 |     | V           |    | E2 |     | V  |    |     |    |  |
|     | 1       | 2 | 3 | 4 | 1 | 2 | 3           | 4        |                    |         | 1    | 2   | F   | H   | F  | H   | F           | H  | F  | H   | F  | H  |     |    |  |
| TFs | Antigen |   |   |   |   |   |             |          | SRC3 / NCOA3*      | 8202    | 325  | 165 | 286 | 201 | 74 | 332 | 215         | 52 | 73 | 142 | 36 | 23 | 6   | 4  |  |
|     |         |   |   |   |   |   |             |          | ER $\alpha$ / ESR1 | 2099    |      |     |     |     |    |     |             |    |    |     | 56 | 39 | 110 | 72 |  |
|     |         |   |   |   |   |   |             |          | ELF1*              | 1997    |      |     |     |     |    |     |             |    |    |     | 3  | 1  |     |    |  |
|     |         |   |   |   |   |   |             |          | TRPS1              | 7227    |      |     | 2   | 2   |    |     |             |    |    |     |    |    | 2   |    |  |
|     |         |   |   |   |   |   |             |          | RELA               | 5970    |      | 3   | 1   |     |    |     |             |    |    |     |    |    |     |    |  |
|     |         |   |   |   |   |   |             |          | RFX1               | 5989    |      | 1   |     |     |    |     |             |    |    |     |    |    |     |    |  |
|     |         |   |   |   |   |   |             |          | RXRB               | 6257    |      | 1   |     |     |    |     |             |    |    |     |    |    |     |    |  |
|     |         |   |   |   |   |   |             |          | RXRA               | 6256    |      | 2   |     |     |    |     |             |    |    |     |    |    |     |    |  |
|     |         |   |   |   |   |   |             |          | NR2F2              | 7026    |      | 2   |     |     |    |     |             |    |    |     |    |    |     | 1  |  |
|     |         |   |   |   |   |   |             |          | MAX                | 4149    | 4    |     |     |     |    |     |             |    |    |     |    |    |     |    |  |
|     |         |   |   |   |   |   |             |          | ZIM2               | 23619   |      |     |     |     | 1  |     |             |    |    |     |    |    |     |    |  |
|     |         |   |   |   |   |   |             |          | MTA2*              | 9219    |      | 9   |     |     |    |     |             |    | 4  | 3   | 1  | 2  |     |    |  |
|     |         |   |   |   |   |   |             |          | GATAD2A*           | 54815   | 1    | 7   |     |     |    |     |             |    | 3  | 2   |    |    |     |    |  |
|     |         |   |   |   |   |   |             |          | GATAD2B            | 57459   |      | 3   |     |     |    |     |             |    |    |     |    |    |     |    |  |
|     |         |   |   |   |   |   |             |          | HDAC2              | 3066    |      | 2   |     |     |    |     |             |    | 1  |     |    |    |     |    |  |
|     |         |   |   |   |   |   |             | HDAC1    | 3065               |         | 9    | 1   | 1   |     |    |     |             | 2  | 2  | 3   | 3  |    |     |    |  |
|     |         |   |   |   |   |   |             | RBBP4    | 5928               |         | 2    |     |     |     |    |     |             |    |    |     |    |    |     |    |  |
|     |         |   |   |   |   |   |             | CHD4     | 1108               |         |      |     |     |     |    |     |             | 3  | 2  |     |    | 1  |     |    |  |
|     |         |   |   |   |   |   |             | EHMT1    | 79813              |         |      |     |     |     |    |     |             | 1  |    |     |    |    |     |    |  |
|     |         |   |   |   |   |   |             | IRF2BP1  | 26145              |         | 2    | 1   |     |     |    |     |             |    |    |     |    |    |     |    |  |
|     |         |   |   |   |   |   |             | PAF1     | 54623              | 2       |      | 4   |     |     |    |     |             |    |    |     |    |    |     |    |  |
|     |         |   |   |   |   |   |             | WDR61    | 80349              |         |      | 1   |     |     |    |     |             |    |    |     |    |    |     |    |  |
|     |         |   |   |   |   |   |             | PPP2CA   | 5515               |         | 2    |     |     |     |    |     |             |    |    |     |    |    |     |    |  |
|     |         |   |   |   |   |   |             | PPP1CA   | 5499               |         | 5    |     |     |     |    | 1   |             | 1  |    |     |    |    |     |    |  |
|     |         |   |   |   |   |   |             | PPP1CC   | 5501               |         |      | 5   |     |     |    |     | 1           |    |    |     |    |    | 2   |    |  |
|     |         |   |   |   |   |   |             | PPP1CB   | 5500               |         |      | 1   |     |     |    |     |             |    |    |     |    |    |     |    |  |
|     |         |   |   |   |   |   |             | TCEB2    | 6923               |         | 1    |     |     |     |    |     |             | 2  | 2  | 5   | 3  |    |     |    |  |
|     |         |   |   |   |   |   |             | TCEB1    | 6921               |         |      | 3   |     |     |    |     |             |    |    |     |    |    | 2   |    |  |
|     |         |   |   |   |   |   |             | DDX5     | 1655               | 12      | 31   | 44  | 7   | 4   | 5  | 6   | 1           | 1  |    | #   | #  | #  | #   |    |  |
|     |         |   |   |   |   |   |             | DDX17    | 10521              | 2       | 10   | 15  |     |     | 3  |     |             |    |    | #   | #  | #  | #   |    |  |
|     |         |   |   |   |   |   |             | DDX52    | 11056              | 7       |      | 3   |     |     |    |     |             |    | #  | #   | #  | #  |     |    |  |
|     |         |   |   |   |   |   |             | KIAA0460 | 23248              | 1       | 5    | 5   |     | 6   | 1  |     |             | 2  |    |     |    |    |     |    |  |
|     |         |   |   |   |   |   |             | COIL     | 8161               |         | 10   | 3   |     |     | 1  |     |             | 1  | 1  |     |    | 3  |     |    |  |
|     |         |   |   |   |   |   |             | TRIP12   | 9320               |         |      | 4   | 9   |     |    | 7   | 1           |    |    |     |    | 7  |     |    |  |
|     |         |   |   |   |   |   |             | MYST2    | 11143              |         |      | 5   |     | 2   |    |     |             |    |    |     |    |    | 1   |    |  |
|     |         |   |   |   |   |   |             | KIAA1967 | 57805              | 5       | 4    | 15  | 4   |     |    |     |             |    |    | 1   |    | 2  | 3   |    |  |
|     |         |   |   |   |   |   |             | PCMTD1   | 115294             |         | 2    | 3   |     |     |    |     |             |    | 3  | 1   | 5  | 4  |     |    |  |
|     |         |   |   |   |   |   |             | PDXDC1*  | 23042              |         | 9    |     |     |     |    |     |             | 3  | 1  |     |    |    |     |    |  |
|     |         |   |   |   |   |   |             | ARFGAP2  | 84364              |         | 9    |     |     |     |    |     |             | 2  |    |     |    | 1  |     |    |  |
|     |         |   |   |   |   |   |             | GTF3C4   | 9329               |         | 7    |     |     |     |    |     |             |    |    |     |    |    | 1   |    |  |
|     |         |   |   |   |   |   |             | SMARCA1  | 6594               |         | 3    |     |     |     |    |     |             |    |    | 3   |    |    | 2   |    |  |
|     |         |   |   |   |   |   |             | MAP2K2   | 5605               |         | 2    |     |     |     |    |     |             | 2  |    |     |    | 3  |     |    |  |
|     |         |   |   |   |   |   |             | SMARCB1  | 6598               |         | 2    |     |     |     |    |     |             | 1  |    |     |    |    |     |    |  |
|     |         |   |   |   |   |   |             | PCMTD2   | 55251              |         |      | 4   |     |     |    |     |             |    | 4  |     |    |    | 3   | 2  |  |
|     |         |   |   |   |   |   |             | ATAD2    | 29028              |         |      | 4   |     |     |    |     |             |    |    |     |    |    | 2   |    |  |
|     |         |   |   |   |   |   |             | UBR5     | 51366              |         |      | 1   |     |     |    |     |             |    | 2  |     |    |    | 6   | 3  |  |
|     |         |   |   |   |   |   |             | SMARCE1  | 6605               |         |      | 1   |     |     |    |     |             |    |    |     |    |    |     | 4  |  |
|     |         |   |   |   |   |   |             | RACGAP1  | 29127              | 2       | 12   | 9   |     | 7   | 7  |     |             |    |    |     |    |    |     |    |  |
|     |         |   |   |   |   |   |             | TAX1BP1  | 8887               | 5       | 7    | 2   |     |     |    | 1   |             |    |    |     |    |    |     |    |  |
|     |         |   |   |   |   |   |             | CSTF2    | 1478               | 2       |      |     |     |     | 5  |     |             |    |    |     |    |    |     |    |  |
|     |         |   |   |   |   |   |             | RAD18    | 56852              |         | 3    |     |     |     | 4  |     |             |    |    |     |    |    |     |    |  |
|     |         |   |   |   |   |   |             | TP53BP2  | 7159               |         | 1    |     |     |     | 6  |     |             |    |    |     |    |    |     |    |  |
|     |         |   |   |   |   |   |             | C17orf28 | 283987             |         |      | 17  |     | 4   |    |     | 1           |    |    |     |    |    |     |    |  |
|     |         |   |   |   |   |   |             | GTF2H4   | 2968               |         |      |     | 1   |     |    |     |             |    |    |     |    |    |     |    |  |
|     |         |   |   |   |   |   |             | TAF4     | 6874               |         |      |     | 1   |     |    |     | 1           |    |    |     |    |    |     |    |  |
|     |         |   |   |   |   |   |             | C14orf4  | 64207              | 4       | 8    | 14  | 2   |     |    |     |             | 1  |    |     |    |    |     |    |  |
|     |         |   |   |   |   |   |             | AGGF1    | 55109              | 3       | 2    | 1   | 2   |     |    |     |             |    |    |     |    |    |     |    |  |
|     |         |   |   |   |   |   |             | C9orf140 | 89958              | 2       |      | 1   |     |     |    |     |             |    |    |     |    |    |     |    |  |
|     |         |   |   |   |   |   |             | C20orf77 | 58490              |         | 2    | 2   |     |     |    |     |             |    |    |     |    |    |     |    |  |
|     |         |   |   |   |   |   |             | SCYL2    | 55681              |         | 2    | 2   |     |     |    |     |             |    |    |     |    |    |     |    |  |
|     |         |   |   |   |   |   |             | SEH1L    | 81929              |         | 2    | 2   |     |     |    |     |             |    |    |     |    |    |     |    |  |
|     |         |   |   |   |   |   |             | NFKB1    | 4790               |         |      |     | 2   | 1   |    |     |             |    |    |     |    |    |     |    |  |
|     |         |   |   |   |   |   |             | PHF15    | 23338              |         |      |     | 2   | 1   |    |     |             |    |    |     |    |    |     |    |  |
|     |         |   |   |   |   |   |             | CDC42EP4 | 23580              | 2       |      |     |     |     |    |     |             |    |    |     |    |    |     |    |  |
|     |         |   |   |   |   |   |             | DIABLO   | 56616              | 3       |      |     |     |     |    |     |             |    |    |     |    |    |     |    |  |
|     |         |   |   |   |   |   |             | TP53BP1  | 7158               | 1       |      |     |     |     |    |     |             |    |    |     |    |    |     |    |  |
|     |         |   |   |   |   |   |             | MED20    | 9477               |         | 2    |     |     |     |    |     |             |    |    |     |    |    |     |    |  |
|     |         |   |   |   |   |   |             | MED30    | 90390              |         | 3    |     |     |     |    |     |             |    |    |     |    |    |     |    |  |
|     |         |   |   |   |   |   |             | GTF3C3   | 9330               |         | 8    |     |     |     |    |     |             |    |    |     |    |    |     |    |  |
|     |         |   |   |   |   |   |             | CNOT3    | 4849               |         | 3    |     |     |     |    |     |             |    |    |     |    |    |     |    |  |
|     |         |   |   |   |   |   |             | GTF2IRD1 | 9569               |         | 5    |     |     |     |    |     |             |    |    |     |    |    |     |    |  |
|     |         |   |   |   |   |   |             | NFATC2IP | 84901              |         | 2    |     |     |     |    |     |             |    |    |     |    |    |     |    |  |
|     |         |   |   |   |   |   |             | BRD2     | 6046               |         | 1    |     |     |     |    |     |             |    |    |     |    |    |     |    |  |
|     |         |   |   |   |   |   |             | ARL1     | 400                |         | 3    |     |     |     |    |     |             |    |    |     |    |    |     |    |  |
|     |         |   |   |   |   |   |             | ARHGEF1  | 9138               |         | 1    |     |     |     |    |     |             |    |    |     |    |    |     |    |  |
|     |         |   |   |   |   |   |             | CNOT10   | 25904              |         | 3    |     |     |     |    |     |             |    |    |     |    |    |     |    |  |
|     |         |   |   |   |   |   |             | ARF6     | 382                |         | 4    |     |     |     |    |     |             |    |    |     |    |    |     |    |  |
|     |         |   |   |   |   |   |             | TIA1     | 7072               |         |      | 1   |     |     |    |     |             |    |    |     |    |    |     |    |  |
|     |         |   |   |   |   |   |             | MED12    | 9968               |         |      | 1   |     |     |    |     |             |    |    |     |    |    |     |    |  |
|     |         |   |   |   |   |   |             | TRRAP    | 8295               |         |      | 2   |     |     |    |     |             |    |    |     |    |    |     |    |  |
|     |         |   |   |   |   |   |             | INOC1    | 54617              |         |      |     | 2   |     |    |     |             |    |    |     |    |    |     |    |  |
|     |         |   |   |   |   |   |             | NFRKB    | 4798               |         |      |     | 1   |     |    |     |             |    |    |     |    |    |     |    |  |
|     |         |   |   |   |   |   |             | GYG1     | 2992               |         |      |     | 2   |     |    |     |             |    |    |     |    |    |     |    |  |
|     |         |   |   |   |   |   |             | ARID1B   | 57492              |         |      |     |     | 1   |    |     |             |    |    |     |    |    |     |    |  |
|     |         |   |   |   |   |   |             | TRIP13   | 9319               |         |      |     |     |     | 9  |     |             |    |    |     |    |    |     |    |  |
|     |         |   |   |   |   |   |             | C11orf30 | 56946              |         |      |     |     |     | 6  |     |             |    |    |     |    |    |     |    |  |
|     |         |   |   |   |   |   |             | SLTM     | 79811              |         |      |     |     |     | 4  |     |             |    |    |     |    |    |     |    |  |
|     |         |   |   |   |   |   |             | CREBBP   | 1387               |         |      |     |     |     | 2  |     |             |    |    |     |    |    |     |    |  |
|     |         |   |   |   |   |   |             | CHD8     | 57680              |         |      |     |     |     |    | 1   |             |    |    |     |    |    |     |    |  |
|     |         |   |   |   |   |   |             | ARID4B   | 51742              |         |      |     |     |     |    |     | 1           |    |    |     |    |    |     |    |  |
|     |         |   |   |   |   |   |             | PSMB6    | 5694               |         |      |     |     |     |    |     |             | 3  |    |     |    |    |     |    |  |

**Supplementary Material 8:** Treatment-dependent SRC-3 and ER interactomes from nuclear extract of E2-, vehicle- (V) treated and untreated (C) MFC-7 breast cancer cells as identified by IP/MS. SRC-3 does not form a multisubunit steady-state core complex, but there are preferred interacting partners that associate with SRC-3 depending on cell signaling states. Proteins that show apparent differences in abundance between treatments are listed. Spectral counts of associated proteins corresponding to the heatmap representation are shown to the right for several experiments. #: Both antibodies used for ER IPs (F:F-10, H: HC-20, SantaCruz BioTechnology) cross-react to DDX5, DDX17 and DDX52, thus, the changes in associations with ER could not be evaluated. \*: Proteins consistently found at higher levels in E2 treated cells for both SRC3 and ER IPs.

**Combined Analysis**

| GID | Symbol          | SRC-3 E2 |     |     |     | SRC-3 CYC |     |     |    | SRC-3 V |     | ER E2 |    | ER V |    | NURSA CoRID |
|-----|-----------------|----------|-----|-----|-----|-----------|-----|-----|----|---------|-----|-------|----|------|----|-------------|
|     |                 | 1        | 2   | 3   | 4   | 1         | 2   | 3   | 4  | 1       | 2   | F     | H  | F    | H  |             |
| 1   | 8202 NCOA3      | 325      | 165 | 286 | 201 | 74        | 332 | 215 | 52 | 73      | 142 | 36    | 23 | 6    | 4  | C91         |
| 2   | 22880 MORC2     | 35       | 22  | 40  | 18  | 8         | 8   | 9   |    |         | 19  |       |    |      |    |             |
| 7   | 23248 KIAA0460  | 1        | 5   | 5   |     |           | 6   | 1   |    |         |     | 2     |    |      |    |             |
| 8   | 8161 COIL       |          | 10  | 3   |     |           |     | 1   |    |         |     | 1     | 1  |      | 3  |             |
| 9   | 115294 PCMTD1   |          | 2   | 3   |     |           |     |     |    |         |     | 3     | 1  | 5    | 4  |             |
| 10  | 6737 TRIM21     |          | 7   |     |     |           |     |     |    |         |     | #     | #  | #    | #  |             |
| 11  | 64207 C14orf4   | 4        | 8   | 14  | 2   |           | 4   | 2   | 2  | 1       |     |       |    |      |    |             |
| 12  | 353116 RILPL1   | 7        |     | 2   | 4   |           | 12  | 3   |    |         |     |       |    |      |    |             |
| 14  | 8467 SMARCA5    |          | 4   |     |     |           |     |     |    |         |     | 5     | 2  | 3    | 6  |             |
| 15  | 2099 ESR1       |          | 3   |     |     |           |     |     |    |         |     | 56    | 39 | 110  | 72 |             |
| 16  | 9320 TRIP12     |          |     | 4   | 9   |           |     | 7   | 1  |         |     |       |    | 7    |    | C156        |
| 17  | 51592 TRIM33    |          |     | 1   |     |           |     |     |    |         |     | 1     | 4  | 3    | 4  |             |
| 18  | 55109 AGGF1     | 3        | 2   | 1   | 2   |           |     |     |    |         |     |       |    |      |    |             |
| 20  | 54815 GATAD2A   | 1        | 7   |     |     |           |     |     |    |         |     | 3     | 2  |      |    |             |
| 21  | 8887 TAX1BP1    | 5        |     | 7   | 2   |           |     |     | 1  |         |     |       |    |      |    |             |
| 23  | 23186 RCOR1     |          | 4   | 1   |     |           |     |     |    |         |     | 1     | 2  |      |    | C194        |
| 24  | 11056 DDX52     |          | 7   |     | 3   |           |     |     |    |         |     | #     | #  | #    | #  |             |
| 25  | 9219 MTA2       |          | 9   |     |     |           |     |     |    |         |     | 4     | 3  | 1    | 2  | C197        |
| 26  | 63897 HEATR6    |          | 6   |     |     |           |     |     |    |         |     | 1     |    | 6    | 3  |             |
| 28  | 55251 PCMTD2    |          |     | 4   |     |           |     |     |    |         |     | 4     |    | 3    | 2  |             |
| 29  | 51366 UBR5      |          |     | 1   |     |           |     |     |    |         |     | 2     |    | 6    | 3  | C11         |
| 31  | 23613 ZMYND8    |          |     |     | 1   |           |     |     |    |         |     | 2     |    | 2    | 1  |             |
| 34  | 357 SHROOM2     | 2        |     | 3   |     |           | 5   |     |    |         |     |       |    |      |    |             |
| 38  | 10849 CD3EAP    |          | 3   | 1   |     |           |     | 1   |    |         |     |       |    |      |    |             |
| 39  | 91748 C14orf43  |          | 2   |     | 1   |           |     |     |    |         |     |       |    |      | 1  |             |
| 40  | 5832 ALDH18A1   |          | 5   |     |     | 12        | 3   |     |    |         |     |       |    |      |    |             |
| 41  | 5499 PPP1CA     |          | 5   |     |     |           |     |     | 1  |         |     |       |    |      |    |             |
| 42  | 23042 PDXDC1    |          | 9   |     |     |           |     |     |    |         |     | 1     |    |      |    |             |
| 43  | 1997 ELF1       |          | 4   |     |     |           |     |     |    |         |     | 3     | 1  |      |    |             |
| 45  | 84364 ARFGAP2   |          | 9   |     |     |           |     |     |    |         |     | 3     | 1  |      |    |             |
| 46  | 5605 MAP2K2     |          | 2   |     |     |           |     |     |    |         |     | 2     |    | 1    |    |             |
| 47  | 55929 DMAP1     |          | 3   |     |     |           |     |     |    |         |     | 2     |    | 3    |    |             |
| 48  | 6594 SMARCA1    |          | 3   |     |     |           |     |     |    |         |     |       | 3  |      | 2  |             |
| 49  | 9328 GTF3C5     |          | 7   |     |     |           |     |     |    |         |     |       |    | 3    | 2  |             |
| 52  | 7227 TRPS1      |          |     | 2   | 2   |           |     |     |    |         |     |       |    | 2    |    |             |
| 54  | 11143 MYST2     |          |     | 5   |     | 2         |     |     |    |         |     |       |    |      | 1  | C87         |
| 55  | 5501 PPP1CC     |          |     | 5   |     |           |     | 1   |    |         |     |       |    | 2    |    |             |
| 56  | 6921 TCEB1      |          |     | 3   |     |           |     |     | 3  |         |     |       |    |      | 2  |             |
| 58  | 10363 HMG20A    |          |     | 2   |     |           |     |     |    |         |     |       |    | 1    | 1  |             |
| 60  | 25885 POLR1A    |          |     |     | 3   |           |     |     |    | 2       |     |       |    |      |    |             |
| 61  | 55601 DDX60     |          |     |     | 1   |           |     |     |    |         |     | 3     |    | 3    |    |             |
| 62  | 57592 ZNF687    |          |     |     | 2   |           |     |     |    |         |     |       | 1  | 5    |    |             |
| 63  | 6878 TAF6       |          |     |     |     |           |     | 1   |    |         |     |       | 1  | 1    |    |             |
| 64  | 196528 ARID2    |          |     |     |     |           |     |     |    |         |     | 2     | 2  | 2    |    |             |
| 65  | 11177 BAZ1A     |          |     |     |     |           |     |     |    |         |     | 1     | 2  | 1    |    | C332        |
| 66  | 6667 SP1        |          |     |     |     |           |     |     |    |         |     | 2     | 1  |      | 1  |             |
| 68  | 6923 TCEB2      |          |     |     |     |           |     |     | 1  |         |     | 2     | 2  | 5    | 3  |             |
| 69  | 57473 ZNF512B   |          | 1   |     |     |           |     |     |    |         |     | 2     | 2  | 4    | 2  |             |
| 70  | 4221 MEN1       |          |     |     |     |           |     |     |    |         |     | 2     |    | 1    | 1  | C351        |
| 71  | 8239 USP9X      |          |     |     |     |           |     |     |    |         |     |       | 5  | 3    | 11 |             |
| 76  | 54623 PAF1      | 2        |     | 4   |     |           |     |     |    |         |     |       |    |      |    |             |
| 77  | 89958 C9orf140  | 2        |     | 1   |     |           |     |     |    |         |     |       |    |      |    |             |
| 78  | 23360 FBNP4     | 2        |     | 5   | 3   |           |     |     |    |         |     |       |    |      |    |             |
| 79  | 1478 CSTF2      | 2        |     |     |     |           | 5   |     | 1  |         |     |       |    |      |    |             |
| 84  | 5970 RELA       |          | 3   | 1   |     |           |     |     |    |         |     |       |    |      |    | C220        |
| 85  | 58490 C20orf77  |          | 2   | 2   |     |           |     |     |    |         |     |       |    |      |    |             |
| 86  | 55681 SCYL2     |          | 2   | 2   |     |           |     |     |    |         |     |       |    |      |    |             |
| 87  | 81929 SEH1L     |          | 2   | 2   |     |           |     |     |    |         |     |       |    |      |    |             |
| 88  | 26145 IRF2BP1   |          | 2   | 1   |     |           |     |     |    |         |     |       |    |      |    |             |
| 89  | 56852 RAD18     |          | 3   |     |     |           |     | 4   |    |         |     |       |    |      |    |             |
| 90  | 7159 TP53BP2    |          | 1   |     |     |           |     | 6   |    |         |     |       |    |      |    |             |
| 93  | 3066 HDAC2      |          | 2   |     |     |           |     |     |    |         |     | 1     |    |      |    | C67         |
| 100 | 9329 GTF3C4     |          | 7   |     |     |           |     |     |    |         |     |       |    |      | 1  |             |
| 101 | 7026 NR2F2      |          | 2   |     |     |           |     |     |    |         |     |       |    |      | 1  |             |
| 103 | 4790 NFKB1      |          |     | 2   | 1   |           |     |     |    |         |     |       |    |      |    |             |
| 104 | 23338 PHF15     |          |     | 2   | 1   |           |     |     |    |         |     |       |    |      |    |             |
| 105 | 283987 C17orf28 |          |     | 17  |     | 4         |     |     |    |         |     |       |    |      |    |             |
| 106 | 7343 UBTf       |          |     | 1   |     |           |     |     |    |         |     | 1     |    |      |    |             |
| 110 | 2976 GTF3C2     |          |     | 8   |     |           |     |     |    |         |     |       |    |      | 5  |             |
| 111 | 29028 ATAD2     |          |     | 4   |     |           |     |     |    |         |     |       |    |      | 2  |             |
| 116 | 7030 TFE3       |          |     |     | 3   |           |     |     |    |         |     |       |    |      |    |             |
| 117 | 6874 TAF4       |          |     |     | 1   |           | 2   |     | 1  |         |     |       |    |      |    |             |
| 118 | 2968 GTF2H4     |          |     |     | 1   |           |     |     | 1  |         |     |       |    |      |    |             |
| 120 | 1523 CUX1       |          |     |     |     |           | 2   |     |    |         |     |       | 1  |      |    |             |
| 121 | 26115 TANC2     |          |     |     |     |           | 2   |     |    |         |     |       |    |      | 1  |             |
| 122 | 55226 NAT10     |          |     |     | 1   |           |     |     | 5  |         |     |       |    | 1    | 7  |             |
| 123 | 25939 SAMHD1    |          | 2   | 2   |     |           |     |     |    |         |     | 2     | 1  | 4    |    |             |
| 125 | 11235 PDCD10    |          |     |     |     |           |     |     |    |         |     | 4     |    | 4    |    |             |
| 127 | 23307 FKBP15    |          |     |     |     |           |     |     |    |         |     | 2     |    | 1    |    |             |
| 128 | 1729 DIAPH1     |          |     |     |     |           |     |     |    |         |     | 2     |    | 1    |    |             |
| 131 | 4599 MX1        |          |     |     |     |           |     |     |    |         |     | 2     |    |      | 2  |             |
| 132 | 3933 LCN1       |          |     |     |     |           |     |     |    |         |     |       | 7  | 3    |    |             |
| 133 | 9739 SETD1A     |          |     |     |     |           |     |     |    |         |     |       | 1  | 1    |    |             |
| 134 | 9842 PLEKHM1    |          |     |     |     |           |     |     |    |         |     |       | 1  | 1    |    |             |
| 136 | 285527 FRYL     |          |     |     |     |           |     |     |    |         |     |       | 3  |      | 3  |             |
| 137 | 135112 NCOA7    |          |     |     |     |           |     |     |    |         |     |       | 2  |      | 4  | C96         |
| 138 | 5524 PPP2R4     |          |     |     |     |           |     |     |    |         |     |       | 1  |      | 5  |             |
| 139 | 9687 GREB1      |          |     |     |     |           |     |     |    |         |     |       |    | 39   | 26 |             |
| 141 | 11272 PRR4      |          |     |     |     |           |     |     |    |         |     |       |    | 4    | 2  |             |
| 143 | 10607 TBL3      |          |     |     |     |           |     |     |    |         |     |       |    | 4    | 1  |             |
| 144 | 64897 C12orf43  |          |     |     |     |           |     |     |    |         |     |       |    | 3    | 2  |             |



|     |        |           |  |  |  |   |   |      |
|-----|--------|-----------|--|--|--|---|---|------|
| 283 | 85456  | TNKS1BP1  |  |  |  | 3 |   |      |
| 284 | 84140  | FLJ13305  |  |  |  | 3 |   |      |
| 285 | 282996 | RBM20     |  |  |  | 3 |   |      |
| 286 | 23019  | CNOT1     |  |  |  | 2 |   | C348 |
| 287 | 3665   | IRF7      |  |  |  | 2 |   |      |
| 288 | 55224  | ETNK2     |  |  |  | 1 |   |      |
| 289 | 3101   | HK3       |  |  |  | 1 |   |      |
| 290 | 11215  | AKAP11    |  |  |  | 1 |   |      |
| 291 | 5545   | PRB4      |  |  |  | 1 |   |      |
| 292 | 55308  | DDX19A    |  |  |  | 1 |   |      |
| 293 | 3482   | IGF2R     |  |  |  | 1 |   |      |
| 294 | 3757   | KCNH2     |  |  |  | 1 |   |      |
| 295 | 23093  | TLL5      |  |  |  | 1 |   | C213 |
| 297 | 392    | ARHGAP1   |  |  |  |   | 4 |      |
| 298 | 7707   | ZNF148    |  |  |  |   | 3 |      |
| 299 | 7916   | BAT2      |  |  |  |   | 3 |      |
| 300 | 79039  | DDX54     |  |  |  |   | 3 | C49  |
| 301 | 22984  | PDCD11    |  |  |  |   | 2 |      |
| 302 | 51490  | C9orf114  |  |  |  |   | 2 |      |
| 303 | 51339  | DACT1     |  |  |  |   | 2 |      |
| 305 | 29117  | BRD7      |  |  |  |   | 1 |      |
| 308 | 9898   | UBAP2L    |  |  |  |   | 1 |      |
| 309 | 55131  | RBM28     |  |  |  |   | 1 |      |
| 310 | 3295   | HSD17B4   |  |  |  |   | 1 |      |
| 311 | 5868   | RAB5A     |  |  |  |   | 1 |      |
| 312 | 25831  | HECTD1    |  |  |  |   | 1 |      |
| 313 | 23331  | TTC28     |  |  |  |   | 1 |      |
| 314 | 3839   | KPNA3     |  |  |  |   | 1 |      |
| 315 | 80222  | TARS2     |  |  |  |   | 1 |      |
| 316 | 2990   | GUSB      |  |  |  |   | 1 |      |
| 317 | 85441  | PRIC285   |  |  |  |   | 1 | C17  |
| 318 | 65264  | UBE2Z     |  |  |  |   | 1 |      |
| 319 | 1595   | CYP51A1   |  |  |  |   | 1 |      |
| 320 | 120935 | CCDC38    |  |  |  |   | 1 |      |
| 321 | 1288   | COL4A6    |  |  |  |   | 1 |      |
| 322 | 23101  | MCF2L2    |  |  |  |   | 1 |      |
| 323 | 10053  | AP1M2     |  |  |  |   | 1 |      |
| 324 | 2975   | GTF3C1    |  |  |  |   | 2 | 3    |
| 325 | 5152   | PDE9A     |  |  |  |   |   | 3    |
| 326 | 9759   | HDAC4     |  |  |  |   | 2 | C276 |
| 327 | 7706   | TRIM25    |  |  |  |   | 2 | C338 |
| 328 | 22998  | LIMCH1    |  |  |  |   | 2 |      |
| 329 | 284009 | LOC284009 |  |  |  |   | 2 |      |
| 330 | 5931   | RBBP7     |  |  |  |   | 1 |      |
| 331 | 116092 | DNTTIP1   |  |  |  |   | 1 |      |
| 332 | 22882  | ZHX2      |  |  |  |   | 1 |      |
| 334 | 3800   | KIF5C     |  |  |  |   | 1 |      |
| 335 | 55907  | CMAS      |  |  |  |   | 1 |      |
| 336 | 563    | AZGP1     |  |  |  |   | 1 |      |
| 337 | 5580   | PRKCD     |  |  |  |   | 1 | C321 |
| 338 | 7957   | EPM2A     |  |  |  |   | 1 |      |
| 339 | 54665  | RSBN1     |  |  |  |   | 1 |      |
| 340 | 94025  | MUC16     |  |  |  |   | 1 |      |
| 341 | 761    | CA3       |  |  |  |   | 1 |      |
| 342 | 257    | ALX3      |  |  |  |   | 1 |      |
